# Supplementary material for: Copper-catalyzed regio- and stereoselective fluorocarboalkynylation of alkynes
Source: Royal Society of Chemistry journal article supplement (doi:10.1039/d1qo01201k), 2021-01-01

## Copper-Catalyzed Regio- and Stereoselective Fluorocarboalkynylation of Alkynes

### (Supporting Information)

Binlin Zhao,<sup>\*, a</sup> Yukun Zheng,<sup>a</sup> Tianxiang Zhu,<sup>a</sup> Mengning Wang,<sup>a</sup> Minyan Wang,<sup>\*, b</sup>  
Mengtao Ma<sup>a</sup>

<sup>a</sup>Department of Chemistry and Materials Science, College of Science, Nanjing Forestry  
University, Nanjing 210037, China.

<sup>b</sup>State Key Laboratory of Coordination Chemistry, School of Chemistry and Chemical  
Engineering, Nanjing University, Nanjing 210093, China.

|                                                                             |    |
|-----------------------------------------------------------------------------|----|
| 1. General Information.....                                                 | 2  |
| 2. Preparation of Starting Materials.....                                   | 2  |
| 3. General Procedures for the Synthesis of Trifluoromethyl 1, 3-enynes..... | 4  |
| 4. Characterization Data of the Products <b>3</b> .....                     | 4  |
| 5. Mechanistic Experiments.....                                             | 16 |
| 6. Crossover Experiments.....                                               | 17 |
| 7. Computational Details.....                                               | 19 |
| 8. References.....                                                          | 45 |
| 9. Copies of NMR Spectra.....                                               | 47 |

## 1. General Information.

Unless otherwise noted, all reactions were performed under an argon atmosphere using flame-dried glassware. All new compounds were fully characterized. NMR-spectra were recorded on Bruker AV-300, ARX-400 MHz or a ARX-600 Associated.  $^1\text{H}$  NMR spectra data were reported as  $\delta$  values in ppm relative to chloroform ( $\delta$  7.26) if collected in  $\text{CDCl}_3$ .  $^{13}\text{C}$  NMR spectra data were reported as  $\delta$  values in ppm relative to chloroform ( $\delta$  77.00).  $^1\text{H}$  NMR coupling constants were reported in Hz, and multiplicity was indicated as follows: s (singlet); d (doublet); t (triplet); q (quartet); quint (quintet); m (multiplet); dd (doublet of doublets); ddd (doublet of doublet of doublets); dddd (doublet of doublet of doublet of doublets); dt (doublet of triplets); td (triplet of doublets); ddt (doublet of doublet of triplets); dq (doublet of quartets); app (apparent); br (broad). Mass spectra were conducted at Micromass Q-ToF instrument (ESI) and Agilent Technologies 5973N (EI). All reactions were carried out in flame-dried 25-mL Schlenk tubes with Teflon screw caps under argon. Unless otherwise noted, materials obtained from commercial suppliers were used without further purification.

## 2. Preparation of Starting Materials.

### 2.1 Preparation of 1-(Trifluoromethyl)- $\lambda^3$ -benzo[*d*][1,2]iodaoxol-3(1*H*)-one (Togni's reagent II).

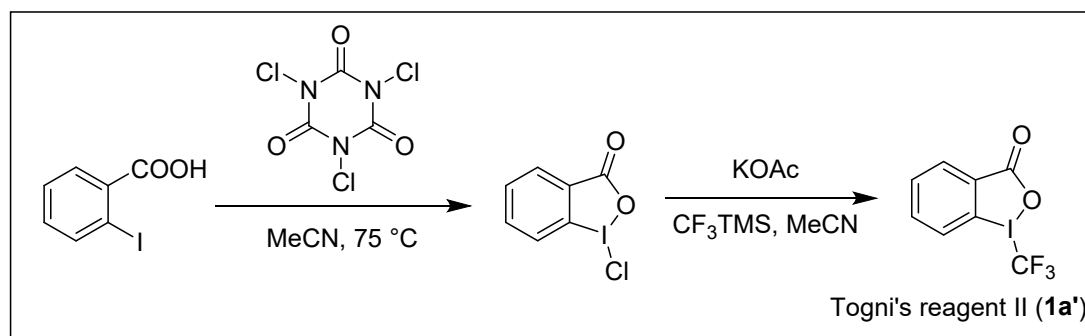

Togni's reagent II (**1a'**) was prepared according to the reported procedure.<sup>1</sup> A suspension of 2-iodobenzoic acid (15.0 g, 60 mmol, 1.0 equiv) in MeCN (100 mL) was

heated to 75 °C. A solution of trichloroisocyanuric acid (4.7 g, 20.4 mmol) in MeCN (25 mL) was added in one portion and the reaction mixture was heated at 75 °C for 10 min. The reaction mixture was diluted with MeCN (75 mL) and vacuum-filtered over an oven-preheated, sintered glass funnel and the filter cake was rinsed with additional hot MeCN (75 mL). The filtrate was concentrated in vacuo to near dryness and the resulting yellow solid was collected by filtration and washed with cold MeCN. The mother liquor from filtration was partially concentrated in vacuo, giving a second crop of crystals. The combined crops were dried under vacuum overnight to afford the title compound as a slightly yellow crystalline solid.

The obtained yellow crystalline solid (11.3 g, 40 mmol, 1.0 equiv), absolute dry KOAc (7.9 g, 80 mmol, 2.0 equiv) and MeCN (115 mL) were added and the reaction mixture was stirred at 75 °C for 2 h. The reaction mixture was cooled to rt, then CF<sub>3</sub>TMS (6.5 mL, 44 mmol, 1.1 equiv) was added in one portion and the reaction mixture was stirred at rt for 15 h. MeCN (80 mL) was then added and the brown reaction mixture was heated to 75 °C and the hot reaction mixture was filtered through a pad of Celite, concentrated to about 40 mL end volume, and cooled to –20 °C. The crystals were filtered off, washed with cold (–20 °C) MeCN (40 mL) and dried under vacuum. The mother liquor was again concentrated to approximately 10 mL end volume and cooled to –20 °C. The crystals were filtered off and washed with a cold (–20 °C) MeCN (10 mL). Both crystalline fractions were dried under a high vacuum to afford the title compound as a white crystalline solid.

## 2.2 Preparation of **1a'''**.

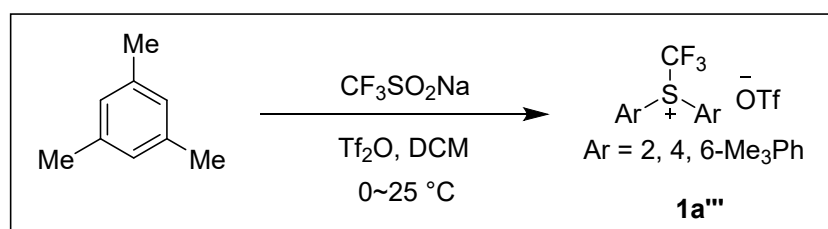

CF<sub>3</sub> reagent **1a'''** was prepared according to the reported procedure.<sup>2</sup> Mesitylene (7 mL, 50 mmol, 5.0 equiv) was added into a suspension of sodium trifluoromethylsulfonate (1.56 g, 10 mmol) in DCM (10 mL) at 0 °C. Tf<sub>2</sub>O (3.4 mL, 20 mmol, 2.0 equiv) was added dropwise over the course of 15 minutes. The reaction

mixture was allowed to warm up to room temperature on its own and stirred at this temperature for 24 hours. The final mixture was quenched with saturated aqueous sodium bicarbonate at 0 °C. Dichloromethane (35 mL) was added and the organic layer was separated. Concentration of the organic solution yielded a brown oil. Dichloromethane (1.5 mL) was added followed by diethyl ether (35 mL) to crash out the product as a white precipitate. This mixture was sonicated for 30 minutes and filtered to yield the product. The product was further purified by recrystallization via layering technique (diethyl ether over DCM at room temperature) to yield pure **1a** as a white solid.

### 3. General Procedures for the Synthesis of Trifluoromethyl 1, 3-enynes.

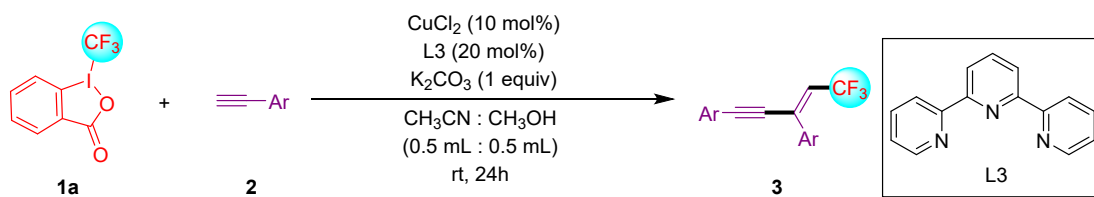

Flame-dried 10 mL Schlenk tube filled with argon, Togni's reagent II (**1a**) (0.2 mmol, 1.0 equiv), alkynes **2** (0.6 mmol, 3.0 equiv), CuCl<sub>2</sub> (0.02 mmol, 10 mol%), 2,2':6',2''-terpyridine (0.04 mmol, 20 mol%), K<sub>2</sub>CO<sub>3</sub> (0.2 mmol, 1.0 equiv), absolute dry CH<sub>3</sub>CN (0.5 mL) and absolute dry CH<sub>3</sub>OH (0.5 mL) were added under N<sub>2</sub>. The formed mixture was stirred at room temperature under N<sub>2</sub> for 24 h as monitored by TLC. The solvent was removed under vacuum directly. The crude product was purified by flash column chromatography on silica gel (eluent: PE/EA) to afford the product **3**.

#### 4. Characterization Data of the Products 3.

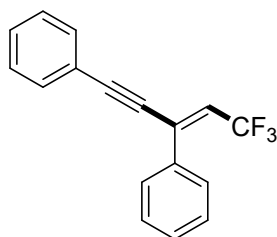

**3a**

**(E)-(5,5,5-Trifluoropent-3-en-1-yne-1,3-diyl)dibenzene (3a):** colorless oil, 39.5 mg (73% yield).  $^1\text{H NMR}$  (400 MHz,  $\text{CDCl}_3$ )  $\delta$  7.55 – 7.46 (m, 4H), 7.42 (dt,  $J = 4.4, 2.7$  Hz, 3H), 7.36 (td,  $J = 5.4, 2.6$  Hz, 3H), 6.22 (q,  $J = 8.7$  Hz, 1H);  $^{13}\text{C NMR}$  (101 MHz,  $\text{CDCl}_3$ )  $\delta$  135.4, 135.0 (q,  $J = 6.3$  Hz), 132.5, 131.8, 129.3, 129.2, 128.4, 128.2, 122.5 (q,  $J = 34.8$  Hz), 122.4 (q,  $J = 270.7$  Hz), 121.9, 94.5, 88.6;  $^{19}\text{F NMR}$  (376 MHz,  $\text{CDCl}_3$ )  $\delta$  -56.1; ATR-FTIR ( $\text{cm}^{-1}$ ): 3062, 2922, 2206, 1622, 1271, 1184, 1127, 759; HRMS  $m/z$  (ESI) calcd for  $\text{C}_{17}\text{H}_{12}\text{F}_3$  ( $\text{M} + \text{H}$ ) $^+$  273.0886, found 273.0889.

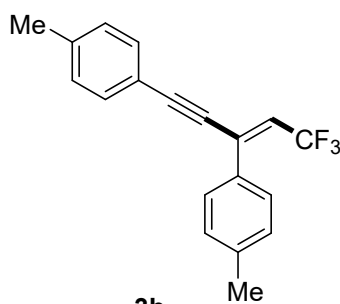

**3b**

**(E)-4,4'-(5,5,5-Trifluoropent-3-en-1-yne-1,3-diyl)bis(methylbenzene) (3b):** colorless oil, 42.7 mg (71% yield).  $^1\text{H NMR}$  (400 MHz,  $\text{CDCl}_3$ )  $\delta$  7.40 (d,  $J = 8.0$  Hz, 2H), 7.34 (d,  $J = 8.2$  Hz, 2H), 7.19 (d,  $J = 8.0$  Hz, 2H), 7.13 (d,  $J = 7.9$  Hz, 2H), 6.14 (q,  $J = 8.8$  Hz, 1H), 2.37 (s, 3H), 2.35 (s, 3H);  $^{13}\text{C NMR}$  (101 MHz,  $\text{CDCl}_3$ )  $\delta$  139.7, 139.4, 135.3 (q,  $J = 6.3$  Hz), 132.8, 131.9, 129.3, 129.1, 128.4 (q,  $J = 2.2$  Hz), 122.7 (q,  $J = 270.3$  Hz), 121.7 (q,  $J = 34.6$  Hz), 119.1, 94.6, 88.5, 21.7, 21.5;  $^{19}\text{F NMR}$  (376 MHz,  $\text{CDCl}_3$ )  $\delta$  -55.9; ATR-FTIR ( $\text{cm}^{-1}$ ):  $\nu = 3013, 2893, 2152, 1618, 1490, 1300, 1170, 1129, 900, 538$ ; HRMS  $m/z$  (ESI) calcd for  $\text{C}_{19}\text{H}_{16}\text{F}_3$  ( $\text{M} + \text{H}$ ) $^+$  301.1199, found 301.1196.

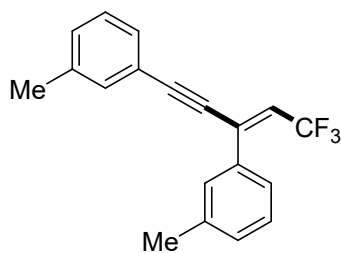

**3c**

**(E)-3,3'-(5,5,5-Trifluoropent-3-en-1-yne-1,3-diyl)bis(methylbenzene) (3c):**

colorless oil, 41.9 mg (71% yield).  $^1\text{H NMR}$  (400 MHz,  $\text{CDCl}_3$ )  $\delta$  7.28-7.16 (m, 8H), 6.17 (q,  $J = 8.6$  Hz, 1H), 2.38 (s, 3H), 2.32 (s, 3H);  $^{13}\text{C NMR}$  (101 MHz,  $\text{CDCl}_3$ )  $\delta$  138.2, 137.9, 135.4, 135.2 (q,  $J = 6.0$  Hz), 132.4, 130.2, 129.9, 128.9, 128.8, 128.3, 128.1, 125.3, 122.5 (q,  $J = 270.5$  Hz), 122.2 (q,  $J = 34.6$  Hz), 121.8, 94.6, 88.4, 21.4, 21.2;  $^{19}\text{F NMR}$  (376 MHz,  $\text{CDCl}_3$ )  $\delta$  -56.0; ATR-FTIR ( $\text{cm}^{-1}$ ): 3033, 2923, 2204, 1613, 1510, 1266, 1180, 1110, 817, 524; HRMS  $m/z$  (ESI) calcd for  $\text{C}_{19}\text{H}_{16}\text{F}_3$  ( $\text{M} + \text{H}$ ) $^+$  301.1199, found 301.1205.

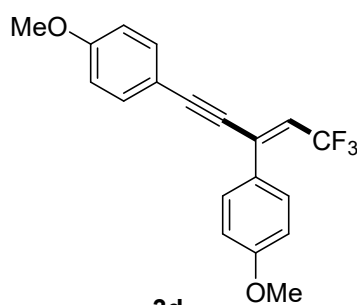

**3d**

**(E)-4,4'-(5,5,5-Trifluoropent-3-en-1-yne-1,3-diyl)bis(methoxybenzene) (3d):**

colorless oil, 46.3 mg (70% yield).  $^1\text{H NMR}$  (400 MHz,  $\text{CDCl}_3$ )  $\delta$  7.48 (d,  $J = 8.7$  Hz, 2H), 7.41 (d,  $J = 8.8$  Hz, 2H), 6.92 (d,  $J = 8.8$  Hz, 2H), 6.87 (d,  $J = 8.8$  Hz, 2H), 6.10 (q,  $J = 8.9$  Hz, 1H), 3.84 (s, 3H), 3.82 (s, 3H);  $^{13}\text{C NMR}$  (101 MHz,  $\text{CDCl}_3$ )  $\delta$  160.3, 134.7, 133.4, 129.9, 127.8, 122.7 (q,  $J = 268.9$  Hz), 120.5 (q,  $J = 34.5$  Hz), 114.1, 113.6, 94.2, 88.0, 55.32, 55.28;  $^{19}\text{F NMR}$  (376 MHz,  $\text{CDCl}_3$ )  $\delta$  -55.9; ATR-FTIR ( $\text{cm}^{-1}$ ): 2939, 2779, 2243, 1630, 1492, 1284, 1168, 1101, 1020, 760; HRMS  $m/z$  (ESI) calcd for  $\text{C}_{19}\text{H}_{15}\text{F}_3\text{NaO}_2$  ( $\text{M} + \text{Na}$ ) $^+$  355.0916, found 355.0920.

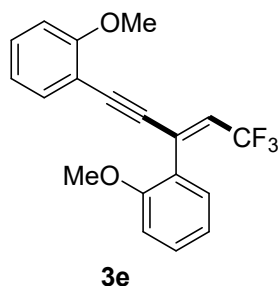

**(E)-2,2'-(5,5,5-Trifluoropent-3-en-1-yne-1,3-diyl)bis(methoxybenzene) (3e):** colorless oil, 53.9 mg (81% yield).  $^1\text{H NMR}$  (400 MHz,  $\text{CDCl}_3$ )  $\delta$  7.38 – 7.22 (m, 4H), 7.00 – 6.79 (m, 4H), 6.25 (q,  $J = 8.4$  Hz, 1H), 3.83 (s, 3H), 3.80 (s, 3H).;  $^{13}\text{C NMR}$  (101 MHz,  $\text{CDCl}_3$ )  $\delta$  160.2, 156.3, 133.7, 131.3 (q,  $J = 6.2$  Hz), 130.6, 130.1, 129.5, 124.6, 123.75 (q,  $J = 33.9$  Hz), 122.4 (q,  $J = 270.5$  Hz), 120.3, 120.2, 111.5, 111.0, 110.7, 92.2, 90.0, 55.7, 55.6;  $^{19}\text{F NMR}$  (376 MHz,  $\text{CDCl}_3$ )  $\delta$  -59.0; ATR-FTIR ( $\text{cm}^{-1}$ ): 2939, 2840, 2203, 1627, 1492, 1274, 1179, 1104, 1022, 751; HRMS  $m/z$  (ESI) calcd for  $\text{C}_{19}\text{H}_{16}\text{F}_3\text{O}_2$  ( $\text{M} + \text{H}$ ) $^+$  333.1097, found 333.1095.

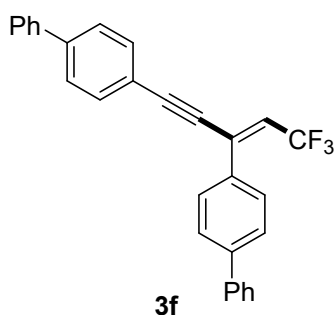

**(E)-4,4''-(5,5,5-trifluoropent-3-en-1-yne-1,3-diyl)di-1,1'-biphenyl (3f):** colorless oil, 71.8 mg (85% yield).  $^1\text{H NMR}$  (500 MHz,  $\text{CDCl}_3$ )  $\delta$  7.69 – 6.60 (m, 12H), 7.50 – 7.48 (m, 4H), 7.43 – 7.32 (m, 2H), 6.31 (q,  $J = 8.4$  Hz, 1H);  $^{13}\text{C NMR}$  (126 MHz,  $\text{CDCl}_3$ )  $\delta$  142.1, 142.0, 140.3, 140.0, 134.7 (q,  $J = 6.3$  Hz), 134.2, 132.9, 132.3, 128.9, 128.8, 127.9, 127.7, 127.12, 127.09, 127.0, 126.9, 122.5 (q,  $J = 270.6$  Hz), 122.3 (q,  $J = 34.6$  Hz), 120.7, 94.5, 89.3;  $^{19}\text{F NMR}$  (471 MHz,  $\text{CDCl}_3$ )  $\delta$  -55.8; ATR-FTIR ( $\text{cm}^{-1}$ ): 2921, 2855, 2209, 1609, 1439, 1256, 1178, 1130, 1026, , 820; HRMS  $m/z$  (ESI) calcd for  $\text{C}_{29}\text{H}_{19}\text{F}_3\text{Na}$  ( $\text{M} + \text{Na}$ ) $^+$  447.1331, found 447.1335.

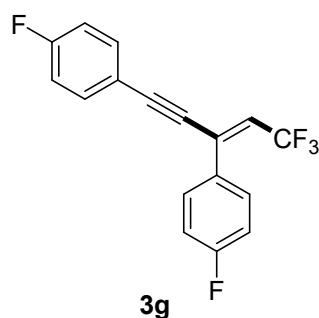

**(E)-4,4'-(5,5,5-trifluoropent-3-en-1-yne-1,3-diyl)bis(fluorobenzene) (3g):** colorless oil, 38.2 mg (62% yield).  $^1\text{H NMR}$  (400 MHz,  $\text{CDCl}_3$ )  $\delta$  7.55 – 7.38 (m, 4H), 7.18 – 6.94 (m, 4H), 6.20 (q,  $J = 8.6$  Hz, 1H);  $^{13}\text{C NMR}$  (101 MHz,  $\text{CDCl}_3$ )  $\delta$  163.2 (d,  $J = 249.4$  Hz), 163.1 (d,  $J = 251.6$  Hz), 133.9 (d,  $J = 8.6$  Hz), 131.2 (d,  $J = 3.0$  Hz), 130.2 (d,  $J = 8.8$  Hz), 122.7 (q,  $J = 34.7$  Hz), 122.3 (q,  $J = 270.6$  Hz), 117.9 (d,  $J = 3.2$  Hz), 115.9 (d,  $J = 22.2$  Hz), 115.4 (d,  $J = 21.8$  Hz), 93.6, 88.1;  $^{19}\text{F NMR}$  (376 MHz,  $\text{CDCl}_3$ )  $\delta$  -56.2, -108.8, -111.6; **ATR-FTIR** ( $\text{cm}^{-1}$ ): 2358, 2199, 1576, 1479, 1444, 1268, 1200, 1134, 952, 880; **HRMS m/z (ESI)** calcd for  $\text{C}_{17}\text{H}_{10}\text{F}_5$  ( $\text{M} + \text{H}$ ) $^+$  309.0697, found 309.0695.

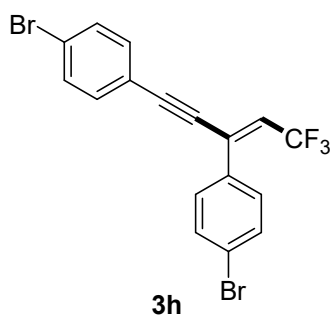

**(E)-4,4'-(5,5,5-trifluoropent-3-en-1-yne-1,3-diyl)bis(bromobenzene) (3h):** yellow oil, 57.0 mg (66% yield).  $^1\text{H NMR}$  (400 MHz,  $\text{CDCl}_3$ )  $\delta$  7.54 (d,  $J = 8.6$  Hz, 2H), 7.49 (d,  $J = 8.5$  Hz, 2H), 7.35 (d,  $J = 8.5$  Hz, 2H), 7.31 (d,  $J = 8.5$  Hz, 2H), 6.20 (q,  $J = 8.6$  Hz, 1H);  $^{13}\text{C NMR}$  (101 MHz,  $\text{CDCl}_3$ )  $\delta$  134.0, 133.6 (q,  $J = 6.4$  Hz), 133.2, 131.8, 131.5, 129.8, 124.1, 123.3 (q,  $J = 34.8$  Hz), 122.3 (q,  $J = 268.5$  Hz), 120.6, 93.7, 89.0;  $^{19}\text{F NMR}$  (376 MHz,  $\text{CDCl}_3$ )  $\delta$  -56.2; **ATR-FTIR** ( $\text{cm}^{-1}$ ): 2923, 2207, 1586, 1484, 1357, 1266, 1123, 1008, 823; **HRMS m/z (ESI)** calcd for  $\text{C}_{17}\text{H}_{10}\text{Br}_2\text{F}_3$  ( $\text{M} + \text{H}$ ) $^+$  428.9096, found 428.9099.



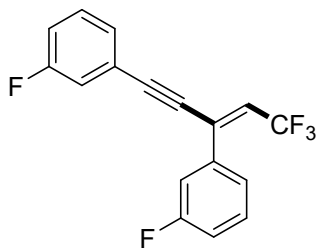

**3i**

**(E)-3,3'-(5,5,5-trifluoropent-3-en-1-yne-1,3-diyl)bis(fluorobenzene) (3i):** colorless oil, 34.3 mg (56% yield).  $^1\text{H NMR}$  (400 MHz,  $\text{CDCl}_3$ )  $\delta$  7.41 – 7.29 (m, 2H), 7.26 – 7.05 (m, 6H), 6.24 (q,  $J = 8.5$  Hz, 1H);  $^{13}\text{C NMR}$  (101 MHz,  $\text{CDCl}_3$ )  $\delta$  162.4 (d,  $J = 247.0$  Hz), 162.3 (d,  $J = 247.5$  Hz), 136.9 (d,  $J = 7.6$  Hz), 133.3 (q,  $J = 5.9$  Hz), 130.1 (d,  $J = 8.6$  Hz), 129.9 (d,  $J = 8.3$  Hz), 127.8 (d,  $J = 3.1$  Hz), 124.0, 123.9 (q,  $J = 34.5$  Hz), 122.0 (q,  $J = 270.5$  Hz), 118.6 (d,  $J = 22.9$  Hz), 116.8 (d,  $J = 21.2$  Hz), 116.3 (d,  $J = 20.9$  Hz), 115.4 (d,  $J = 23.1$  Hz), 93.4, 88.5;  $^{19}\text{F NMR}$  (376 MHz,  $\text{CDCl}_3$ )  $\delta$  -56.4, -112.3, -112.5; **ATR-FTIR** ( $\text{cm}^{-1}$ ): 2348, 2207, 1582, 1486, 1436, 1269, 1199, 1120, 943, 787; **HRMS m/z (ESI)** calcd for  $\text{C}_{17}\text{H}_{10}\text{F}_5$  ( $\text{M} + \text{H}$ ) $^+$  309.0697, found 309.0690.

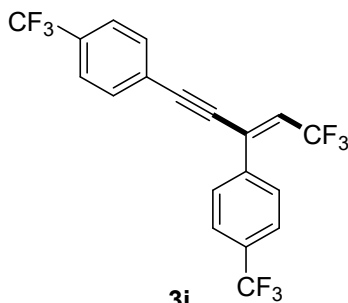

**3j**

**(E)-4,4'-(5,5,5-trifluoropent-3-en-1-yne-1,3-diyl)bis((trifluoromethyl)benzene) (3j):** colorless oil, 53.2 mg (65% yield).  $^1\text{H NMR}$  (400 MHz,  $\text{CDCl}_3$ )  $\delta$  7.41 – 7.29 (m, 2H), 7.26 – 7.05 (m, 6H), 6.24 (q,  $J = 8.5$  Hz, 1H);  $^{13}\text{C NMR}$  (101 MHz,  $\text{CDCl}_3$ )  $\delta$  138.5, 133.2 (q,  $J = 6.1$  Hz), 132.8, 132.1, 131.4 (q,  $J = 32.8$  Hz), 131.2 (q,  $J = 32.9$  Hz), 128.6 (q,  $J = 2.2$  Hz),  $\delta$  125.51, 125.47, 125.43, 125.39, 125.36, 124.9 (q,  $J = 35.0$  Hz), 121.9 (q,  $J = 271.0$  Hz), 93.6, 89.5;  $^{19}\text{F NMR}$  (376 MHz,  $\text{CDCl}_3$ )  $\delta$  -56.5, -62.9, -63.1; **ATR-FTIR** ( $\text{cm}^{-1}$ ): 2957, 2207, 1498, 1436, 1256, 1123, 1045, 943, 871, 787; **HRMS m/z (ESI)** calcd for  $\text{C}_{19}\text{H}_{10}\text{F}_9$  ( $\text{M} + \text{H}$ ) $^+$  409.0633, found 409.0639.

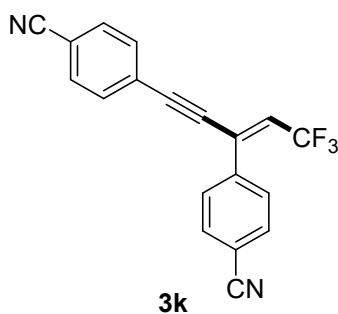

**(E)-4,4'-(5,5,5-trifluoropent-3-en-1-yne-1,3-diyl)dibenzonitrile (3k):** yellow oil, 43.1 mg (67% yield).  $^1\text{H NMR}$  (400 MHz,  $\text{CDCl}_3$ )  $\delta$  7.74 – 7.70 (m, 2H), 7.66 – 7.63 (m, 2H), 7.58 – 7.52 (m, 4H), 6.36 (q,  $J = 8.3$  Hz, 1H);  $^{13}\text{C NMR}$  (101 MHz,  $\text{CDCl}_3$ )  $\delta$  139.2, 132.3, 132.22, 132.17, 128.9 (d,  $J = 2.0$  Hz), 126.0, 125.6 (d,  $J = 35.2$  Hz), 121.7 (d,  $J = 271.1$  Hz), 118.1, 118.0, 113.3, 113.1, 93.4, 90.6;  $^{19}\text{F NMR}$  (376 MHz,  $\text{CDCl}_3$ )  $\delta$  -56.5; **ATR-FTIR** ( $\text{cm}^{-1}$ ): 3068, 2924, 2229, 1622, 1502, 1266, 1122, 838; **HRMS m/z (ESI)** calcd for  $\text{C}_{19}\text{H}_{10}\text{F}_3\text{N}_2$  ( $\text{M} + \text{H}$ ) $^+$  409.0633, found 409.0639.

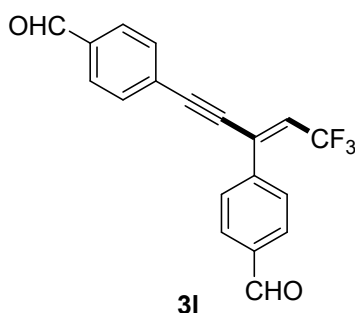

**(E)-4,4'-(5,5,5-Trifluoropent-3-en-1-yne-1,3-diyl)dibenzaldehyde (3l):** yellow oil, 28.3 mg (43% yield).  $^1\text{H NMR}$  (400 MHz,  $\text{CDCl}_3$ )  $\delta$  10.06 (s, 1H), 10.02 (s, 1H), 7.94 (d,  $J = 8.3$  Hz, 2H), 7.86 (d,  $J = 8.4$  Hz, 2H), 7.62 (dd,  $J = 12.2, 8.2$  Hz, 4H), 6.35 (q,  $J = 8.4$  Hz, 1H);  $^{13}\text{C NMR}$  (101 MHz,  $\text{CDCl}_3$ )  $\delta$  191.5, 191.2, 140.7, 136.7, 136.4, 133.2 (q,  $J = 5.9$  Hz), 132.4, 129.7, 129.6, 128.9, 127.5, 125.0 (q,  $J = 35.0$  Hz), 121.9 (q,  $J = 270.8$  Hz), 94.1, 90.7;  $^{19}\text{F NMR}$  (376 MHz,  $\text{CDCl}_3$ )  $\delta$  -56.4; **ATR-FTIR** ( $\text{cm}^{-1}$ ): 2923, 2207, 1683, 1606, 1357, 1259, 1183, 1110, 1023, 833; **HRMS m/z (ESI)** calcd for  $\text{C}_{19}\text{H}_{12}\text{F}_3\text{O}_2$  ( $\text{M} + \text{H}$ ) $^+$  329.0784, found 329.0788.

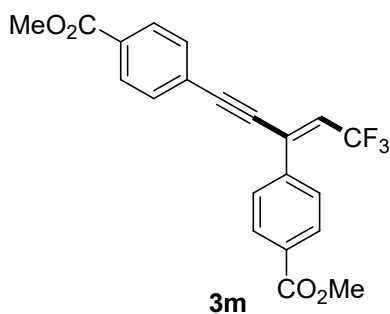

**Dimethyl 4,4'-(5,5,5-trifluoropent-3-en-1-yn-1,3-diyl)(E)-dibenzoate (3m):** yellow oil, 54.2 mg (70% yield).  $^1\text{H NMR}$  (400 MHz,  $\text{CDCl}_3$ )  $^1\text{H NMR}$  (400 MHz, Chloroform-*d*)  $\delta$  8.08 (d,  $J = 8.4$  Hz, 2H), 8.00 (d,  $J = 8.4$  Hz, 2H), 7.52 (dd,  $J = 12.7$ , 8.3 Hz, 4H), 6.30 (q,  $J = 8.4$  Hz, 1H), 3.93 (s, 3H), 3.91 (s, 3H);  $^{13}\text{C NMR}$  (101 MHz,  $\text{CDCl}_3$ )  $\delta$  166.4, 166.2, 139.4, 133.6 (q,  $J = 6.0$  Hz), 132.4, 131.7, 130.8, 130.6, 129.5, 128.2 (q,  $J = 1.8$  Hz), 126.1 (q,  $J = 7.9$  Hz), 124.3 (q,  $J = 35.0$  Hz), 122.0 (q,  $J = 270.9$  Hz), 94.1, 90.1, 52.3, 52.2;  $^{19}\text{F NMR}$  (376 MHz,  $\text{CDCl}_3$ )  $\delta$  -56.4; ATR-FTIR ( $\text{cm}^{-1}$ ): 2954, 2208, 1716, 1615, 1436, 1270, 1184, 1113, 966, 864; HRMS  $m/z$  (ESI) calcd for  $\text{C}_{21}\text{H}_{16}\text{F}_3\text{O}_4$  ( $\text{M} + \text{H}$ ) $^+$  389.0995, found 389.1001.

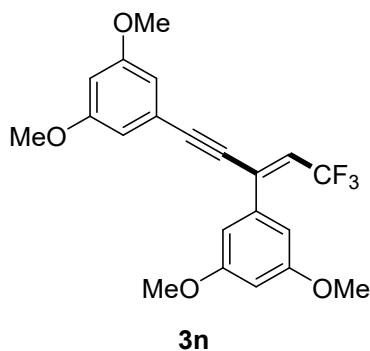

**(E)-5,5'-(5,5,5-Trifluoropent-3-en-1-yn-1,3-diyl)bis(1,3-dimethoxybenzene) (3n):** yellow oil, 55.5 mg (71% yield).  $^1\text{H NMR}$  (400 MHz,  $\text{CDCl}_3$ )  $\delta$  6.64 (d,  $J = 2.3$  Hz, 2H), 6.61 (d,  $J = 2.3$  Hz, 2H), 6.50 (t,  $J = 2.3$  Hz, 1H), 6.49 (t,  $J = 2.3$  Hz, 1H), 6.20 (q,  $J = 8.5$  Hz, 1H), 3.81 (s, 6H), 3.78 (s, 6H);  $^{13}\text{C NMR}$  (101 MHz,  $\text{CDCl}_3$ )  $\delta$  160.54, 160.45, 137.0, 134.8 (q,  $J = 6.1$  Hz), 122.7 (q,  $J = 34.7$  Hz), 120.2 (q,  $J = 270.6$  Hz), 110.2, 109.6, 106.3, 102.7, 101.2, 94.5, 87.7, 55.4, 55.38;  $^{19}\text{F NMR}$  (376 MHz,  $\text{CDCl}_3$ )  $\delta$  -56.1; ATR-FTIR ( $\text{cm}^{-1}$ ): 3008, 2940, 2843, 2205, 1588, 1457, 1276, 1200, 1116, 832; HRMS  $m/z$  (ESI) calcd for  $\text{C}_{21}\text{H}_{19}\text{F}_3\text{NaO}_4$  ( $\text{M} + \text{Na}$ ) $^+$  415.1128, found 415.1129.

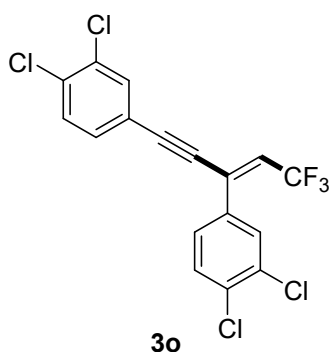

**(E)-4,4'-(5,5,5-trifluoropent-3-en-1-yne-1,3-diyl)bis(1,2-dichlorobenzene) (3o):** yellow oil, 47.2 mg (58% yield).  $^1\text{H NMR}$  (400 MHz,  $\text{CDCl}_3$ )  $\delta$  7.55 (s, 2H), 7.49 (d,  $J = 8.3$  Hz, 1H), 7.43 (d,  $J = 8.3$  Hz, 1H), 7.33 – 7.24 (m, 2H), 6.26 (q,  $J = 8.4$  Hz, 1H);

$^{13}\text{C NMR}$  (101 MHz,  $\text{CDCl}_3$ ) 134.6, 134.2, 133.8, 133.4, 132.9, 132.7, 132.0 (q,  $J = 6.1$  Hz), 130.9, 130.6, 130.4, 130.0, 127.5, 124.6 (q,  $J = 35.1$  Hz), 121.9 (d,  $J = 270.9$  Hz), 121.3, 92.7, 89.0;  $^{19}\text{F NMR}$  (376 MHz,  $\text{CDCl}_3$ )  $\delta$  -56.5; **ATR-FTIR** ( $\text{cm}^{-1}$ ): 2933, 2207, 1582, 1484, 1366, 1269, 1199, 1110, 943, 871, 787; **HRMS m/z (ESI)** calcd for  $\text{C}_{17}\text{H}_8\text{Cl}_4\text{F}_3$  ( $\text{M} + \text{H}$ ) $^+$  408.9327, found 408.9330.

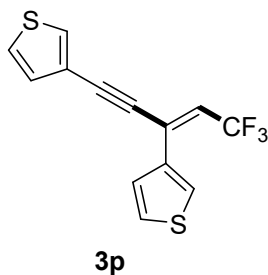

**(E)-3,3'-(5,5,5-Trifluoropent-3-en-1-yne-1,3-diyl)dithiophene (3p):** yellow oil, 25.1 mg (44% yield).  $^1\text{H NMR}$  (400 MHz,  $\text{CDCl}_3$ )  $\delta$  7.65 (t,  $J = 2.3$  Hz, 1H), 7.56 (dd,  $J = 3.0, 1.2$  Hz, 1H), 7.36-7.30 (m, 3H), 7.16 (dd,  $J = 5.0, 1.2$  Hz, 1H), 6.12 (q,  $J = 9.0$  Hz, 1H);  $^{13}\text{C NMR}$  (101 MHz,  $\text{CDCl}_3$ )  $\delta$  135.0, 130.3, 129.7, 129.0 (q,  $J = 6.5$  Hz), 127.9, 127.2, 125.8, 125.6, 122.5 (q,  $J = 270.3$  Hz), 120.8 (q,  $J = 35.4$  Hz), 88.3, 88.0;  $^{19}\text{F NMR}$  (376 MHz,  $\text{CDCl}_3$ )  $\delta$  -56.5; **ATR-FTIR** ( $\text{cm}^{-1}$ ): 3110, 2924, 2205, 1611, 1417, 1263, 1113, 782; **HRMS m/z (ESI)** calcd for  $\text{C}_{13}\text{H}_8\text{F}_3\text{S}_2$  ( $\text{M} + \text{H}$ ) $^+$  285.0014, found 285.0016.

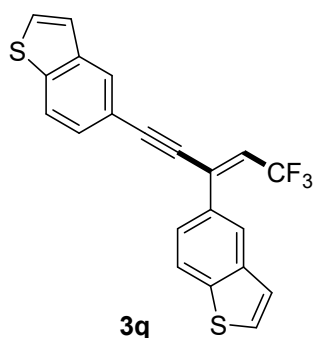

**(E)-5,5'-(5,5,5-trifluoropent-3-en-1-yne-1,3-diyl)bis(benzo[*b*]thiophene) (3q):** yellow oil, 51.7 mg (67% yield). <sup>1</sup>H NMR (400 MHz, CDCl<sub>3</sub>) δ 7.98 (dd, *J* = 16.8, 1.6 Hz, 2H), 7.93 (d, *J* = 8.4 Hz, 1H), 7.84 (d, *J* = 8.4 Hz, 1H), 7.54-7.48 (m, 3H), 7.44-7.39 (m, 2H), 7.31 (d, *J* = 5.6 Hz, 1H), 6.31 (q, *J* = 8.7 Hz, 1H); <sup>13</sup>C NMR (101 MHz, CDCl<sub>3</sub>) δ 140.6, 140.5, 139.5, 139.4, 135.2 (q, *J* = 6.3 Hz), 131.7, 127.7, 127.4, 127.3, 127.2, 124.2 (q, *J* = 1.7 Hz), 124.1, 123.6, 123.4 (q, *J* = 2.2 Hz), 122.6, 122.30, 122.25 (q, *J* = 34.6 Hz), 120.3 (d, *J* = 270.5 Hz), 117.7, 95.1, 88.4; <sup>19</sup>F NMR (376 MHz, CDCl<sub>3</sub>) δ -55.8; ATR-FTIR (cm<sup>-1</sup>): 3074, 2924, 2199, 1617, 1264, 1112, 1027, 813; HRMS *m/z* (ESI) calcd for C<sub>21</sub>H<sub>12</sub>F<sub>3</sub>S<sub>2</sub> (M + H)<sup>+</sup> 385.0327, found 385.0325.

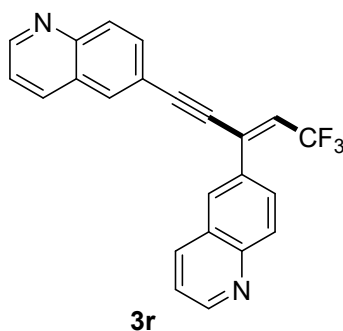

**(E)-6,6'-(5,5,5-Trifluoropent-3-en-1-yne-1,3-diyl)diquinoline (3r):** yellow oil, 49.8 mg (67% yield). <sup>1</sup>H NMR (500 MHz, CDCl<sub>3</sub>) δ 8.93 (dd, *J* = 21.8, 4.4 Hz, 2H), 8.19 (d, *J* = 8.3 Hz, 1H), 8.17 (d, *J* = 8.8 Hz, 1H), 8.11-8.01 (m, 2H), 7.95 (d, *J* = 2.1 Hz, 2H), 7.85 (dd, *J* = 8.8, 2.0 Hz, 1H), 7.71 (dd, *J* = 8.7, 1.8 Hz, 1H), 7.42 (ddd, *J* = 17.0, 8.3, 4.2 Hz, 2H), 6.38 (q, *J* = 8.5 Hz, 1H); <sup>13</sup>C NMR (126 MHz, CDCl<sub>3</sub>) δ 151.5, 151.4, 148.1, 148.0, 136.5, 135.8, 134.0 (q, *J* = 6.1 Hz), 133.3, 132.0, 131.7, 129.8, 129.6, 129.2 (q, *J* = 1.9 Hz), 127.8, 127.67, 127.66, 123.8 (q, *J* = 34.8 Hz), 122.2 (q, *J* = 270.8

Hz), 121.9, 121.7, 119.9, 94.7, 89.1;  $^{19}\text{F}$  NMR (471 MHz,  $\text{CDCl}_3$ )  $\delta$  -56.1; ATR-FTIR ( $\text{cm}^{-1}$ ): 3110, 2933, 2203, 1626, 1567, 1499, 1346, 1277, 1120, 760; HRMS  $m/z$  (ESI) calcd for  $\text{C}_{23}\text{H}_{13}\text{F}_3\text{N}_2\text{Na}$  ( $\text{M} + \text{Na}$ ) $^+$  397.0923, found 397.0925.

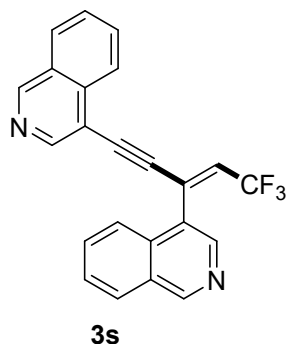

**(E)-4,4'-(5,5,5-Trifluoropent-3-en-1-yne-1,3-diyl)diisoquinoline (3s):** yellow oil, 46.9 mg (63% yield).  $^1\text{H}$  NMR (400 MHz,  $\text{CDCl}_3$ )  $\delta$  9.33 (d,  $J = 0.9$  Hz, 1H), 9.18 (d,  $J = 0.8$  Hz, 1H), 8.62 (s, 1H), 8.57 (s, 1H), 8.13-8.04 (m, 2H), 7.97-7.93 (m, 1H), 7.88 (dd,  $J = 8.2, 1.2$  Hz, 1H), 7.80 (ddd,  $J = 8.4, 6.9, 1.3$  Hz, 1H), 7.69-7.58 (m, 3H), 6.71 (q,  $J = 7.9$  Hz, 1H);  $^{13}\text{C}$  NMR (101 MHz,  $\text{CDCl}_3$ )  $\delta$  153.8, 153.1, 147.1, 141.7, 135.2, 133.1, 131.5, 131.2, 130.1 (q,  $J = 6.0$  Hz), 128.2, 128.13, 128.10, 128.0, 127.8, 127.6, 127.3 (q,  $J = 34.4$  Hz), 126.5, 124.5, 124.0, 121.9 (q,  $J = 271.1$  Hz), 114.3, 94.3, 91.4;  $^{19}\text{F}$  NMR (376 MHz,  $\text{CDCl}_3$ )  $\delta$  -57.4; ATR-FTIR ( $\text{cm}^{-1}$ ): 3064, 2924, 2205, 1628, 1577, 1504, 1351, 1283, 1120, 764; HRMS  $m/z$  (ESI) calcd for  $\text{C}_{23}\text{H}_{13}\text{F}_3\text{N}_2\text{Na}$  ( $\text{M} + \text{Na}$ ) $^+$  397.0923, found 397.0931.

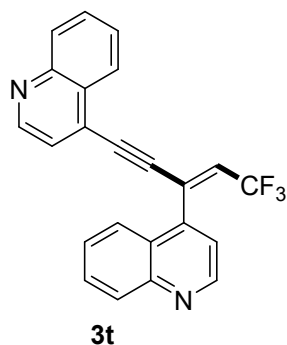

**(E)-4,4'-(5,5,5-trifluoropent-3-en-1-yne-1,3-diyl)diquinoline (3t):** yellow oil, 44.8 mg (60% yield).  $^1\text{H}$  NMR (400 MHz,  $\text{CDCl}_3$ )  $\delta$  9.01 (d,  $J = 4.4$  Hz, 1H), 8.87 (d,  $J = 4.5$  Hz, 1H), 8.23 (d,  $J = 8.5$  Hz, 1H), 8.10 (dd,  $J = 8.0, 4.9$  Hz, 2H), 7.92 – 7.87 (m, 1H), 7.81 (ddd,  $J = 8.4, 6.9, 1.3$  Hz, 1H), 7.72 (ddd,  $J = 8.4, 7.0, 1.4$  Hz, 1H), 7.66 (ddd,

$J = 8.2, 6.9, 1.2$  Hz, 1H), 7.51 (ddd,  $J = 8.2, 7.0, 1.1$  Hz, 1H), 7.43 (d,  $J = 4.5$  Hz, 2H), 6.73 (q,  $J = 7.8$  Hz, 1H);  $^{13}\text{C}$  NMR (101 MHz,  $\text{CDCl}_3$ )  $\delta$  149.9, 149.5, 148.3, 148.0, 140.9, 130.2, 130.12, 130.08, 130.0, 127.9 (q,  $J = 34.7$  Hz), 127.7, 127.5, 127.1, 125.3, 124.8, 124.4 (q,  $J = 276.8$  Hz), 124.0, 120.2, 94.5, 92.1.  $^{19}\text{F}$  NMR (376 MHz,  $\text{CDCl}_3$ )  $\delta$  -57.9; ATR-FTIR ( $\text{cm}^{-1}$ ): 3078, 2945, 2203, 1632, 1589, 1500, 1347, 1300, 1134, 759; HRMS  $m/z$  (ESI) calcd for  $\text{C}_{23}\text{H}_{13}\text{F}_3\text{N}_2\text{Na}$  ( $\text{M} + \text{Na}$ ) $^+$  397.0923, found 397.0925.

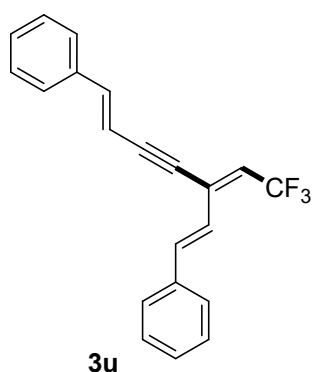

**((1E,5E,6E)-5-(2,2,2-trifluoroethylidene)hepta-1,6-dien-3-yne-1,7-diyl)dibenzene (3u):** yellow oil, 23.4 mg (36% yield).  $^1\text{H}$  NMR (400 MHz,  $\text{CDCl}_3$ )  $\delta$  7.55 – 7.51 (m, 2H), 7.48 – 7.44 (m, 2H), 7.42 – 7.28 (m, 7H), 7.21 – 7.08 (m, 2H), 6.39 (d,  $J = 16.3$  Hz, 1H), 5.96 (q,  $J = 9.0$  Hz, 1H).  $^{13}\text{C}$  NMR (126 MHz,  $\text{CDCl}_3$ )  $\delta$  143.4, 139.0, 135.7 (q,  $J = 5.8$  Hz), 131.9 (q,  $J = 5.9$  Hz), 129.2, 128.84, 128.81, 127.6, 126.5, 123.1 (q,  $J = 270.8$  Hz), 121.3, 120.6 (q,  $J = 34.5$  Hz), 106.9, 93.9, 87.0;  $^{19}\text{F}$  NMR (471 MHz,  $\text{CDCl}_3$ )  $\delta$  -55.7; ATR-FTIR ( $\text{cm}^{-1}$ ): 3031, 2925, 2196, 1589, 1324, 1122, 958; HRMS  $m/z$  (ESI) calcd for  $\text{C}_{21}\text{H}_{16}\text{F}_3$  ( $\text{M} + \text{H}$ ) $^+$  325.1199, found 325.1205.

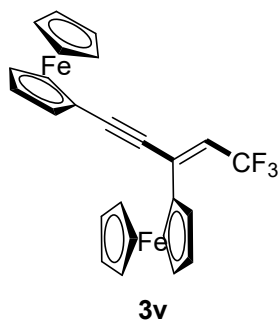

**(E)-(5,5,5-Trifluoropent-3-en-1-yne-1,3-diyl)diferrocene (3v):** red oil, 55.9 mg (57% yield).  $^1\text{H}$  NMR (400 MHz,  $\text{CDCl}_3$ )  $\delta$  5.93 (q,  $J = 9.6$  Hz, 1H), 4.73 (s, 2H), 4.55 (t,  $J$

= 1.8 Hz, 2H), 4.43 – 4.37 (m, 2H), 4.33 – 4.31 (m, 2H), 4.29 (s, 5H), 4.26 (s, 5H); <sup>13</sup>C NMR (126 MHz, CDCl<sub>3</sub>) δ 123.3 (d, *J* = 269.8 Hz), 116.7 (q, *J* = 36.0 Hz), 71.7, 70.3, 70.2, 70.1 (q, *J* = 3.1 Hz), 70.0, 69.4, 67.6; <sup>19</sup>F NMR (471 MHz, CDCl<sub>3</sub>) δ -56.4; ATR-FTIR (cm<sup>-1</sup>): 3094, 2923, 2853, 2206, 1605, 1470, 1263, 1141, 1100, 965, 818; HRMS *m/z* (ESI) calcd for C<sub>25</sub>H<sub>19</sub>F<sub>3</sub>Fe<sub>2</sub> (M + H)<sup>+</sup> 489.0210, found 489.0215.

## 5. Mechanistic Experiments

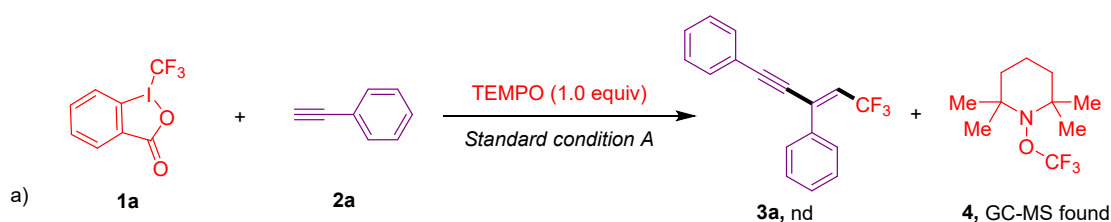

Flame-dried 10 mL Schlenk tube filled with argon, Togni's reagent II (**1a**) (0.2 mmol, 1.0 equiv), phenylacetylene (**2a**) (0.6 mmol, 3.0 equiv), CuCl<sub>2</sub> (0.02 mmol, 10 mol%), 2,2':6',2''-terpyridine (0.04 mmol, 20 mol%), K<sub>2</sub>CO<sub>3</sub> (0.2 mmol, 1.0 equiv), TEMPO (0.3 mmol, 1.5 equiv), absolute dry CH<sub>3</sub>CN (0.5 mL) and absolute dry CH<sub>3</sub>OH (0.5 mL) were added under N<sub>2</sub>. The formed mixture was stirred at room temperature under N<sub>2</sub> for 24 h. The reaction mixture was analyzed by GC-MS showing that no desired product **3a** was formed and CF<sub>3</sub>-TEMPO adduct **4** was detected.

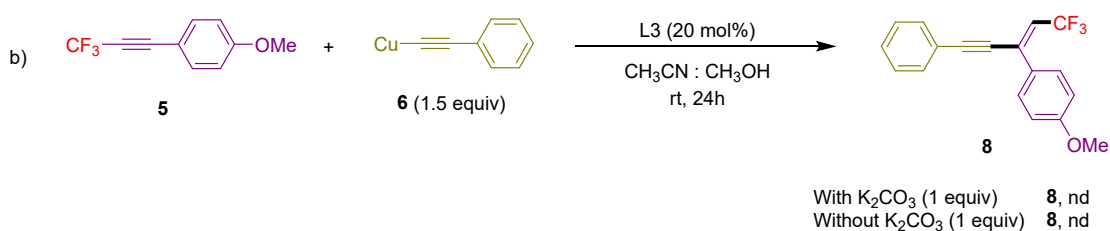

With K<sub>2</sub>CO<sub>3</sub>: Flame-dried 10 mL Schlenk tube filled with argon, 1-methoxy-4-(3,3,3-trifluoroprop-1-yn-1-yl)benzene (**5**)<sup>4</sup> (0.1 equiv, 1.0 equiv), copper acetylide **6**<sup>5</sup> (0.15 mmol, 1.5 equiv), 2,2':6',2''-terpyridine (0.02 mmol, 20 mol%), K<sub>2</sub>CO<sub>3</sub> (0.1 mmol, 1.0 equiv), absolute dry CH<sub>3</sub>CN (0.5 mL) and absolute dry CH<sub>3</sub>OH (0.5 mL) were added under N<sub>2</sub>. The formed mixture was stirred at room temperature under N<sub>2</sub> for 24 h. The reaction mixture was analyzed by GC-MS showing that no desired product **8** was detected.



Without  $K_2CO_3$ : Flame-dried 10 mL Schlenk tube filled with argon, 1-methoxy-4-(3,3,3-trifluoroprop-1-yn-1-yl)benzene (**5**) (0.1 equiv, 1.0 equiv), copper acetylide **6** (0.15 mmol, 1.5 equiv), 2,2':6',2''-terpyridine (0.02 mmol, 20 mol%), absolute dry  $CH_3CN$  (0.5 mL) and absolute dry  $CH_3OH$  (0.5 mL) were added under  $N_2$ . The formed mixture was stirred at room temperature under  $N_2$  for 24 h. The reaction mixture was analyzed by GC-MS showing that no desired product **8** was detected.

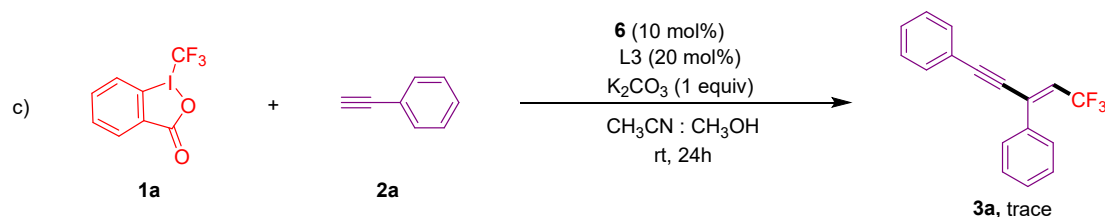

Flame-dried 10 mL Schlenk tube filled with argon, Togni's reagent II (**1a**) (0.2 mmol, 1.0 equiv), alkynes **2** (0.6 mmol, 3.0 equiv), copper acetylide **6** (0.02 mmol, 10 mol%), 2,2':6',2''-terpyridine (0.04 mmol, 20 mol%),  $K_2CO_3$  (0.2 mmol, 1.0 equiv), absolute dry  $CH_3CN$  (0.5 mL) and absolute dry  $CH_3OH$  (0.5 mL) were added under  $N_2$ . The formed mixture was stirred at room temperature under  $N_2$  for 24 h. The reaction mixture was analyzed by GC-MS showing that trace amount of desired product **3a** was detected.

## 6. Crossover Experiments

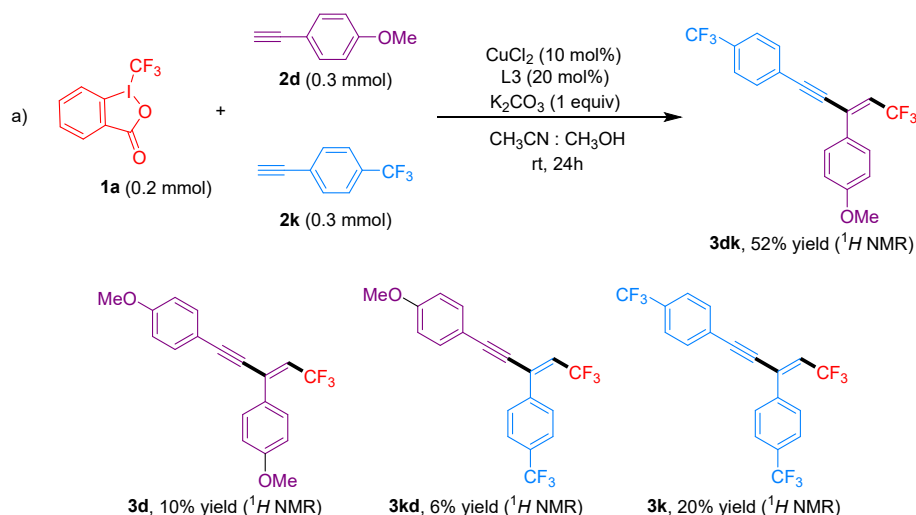

Flame-dried 10 mL Schlenk tube filled with argon, Togni's reagent II (**1a**) (0.2 mmol, 1.0 equiv), alkyne **2d** (0.3 mmol, 1.5 equiv), alkyne **2j** (0.3 mmol, 1.5 equiv),  $CuCl_2$  (0.02 mmol, 10 mol%), 2,2':6',2''-terpyridine (0.04 mmol, 20 mol%),  $K_2CO_3$  (0.2

mmol, 1.0 equiv), absolute dry CH<sub>3</sub>CN (0.5 mL) and absolute dry CH<sub>3</sub>OH (0.5 mL) were added under N<sub>2</sub>. The formed mixture was stirred at room temperature under N<sub>2</sub> for 24 h as monitored by TLC. The solvent was removed under vacuum directly. The crude product was analyzed by crude <sup>1</sup>H NMR using dibromomethane (0.2 mmol) as internal standard.

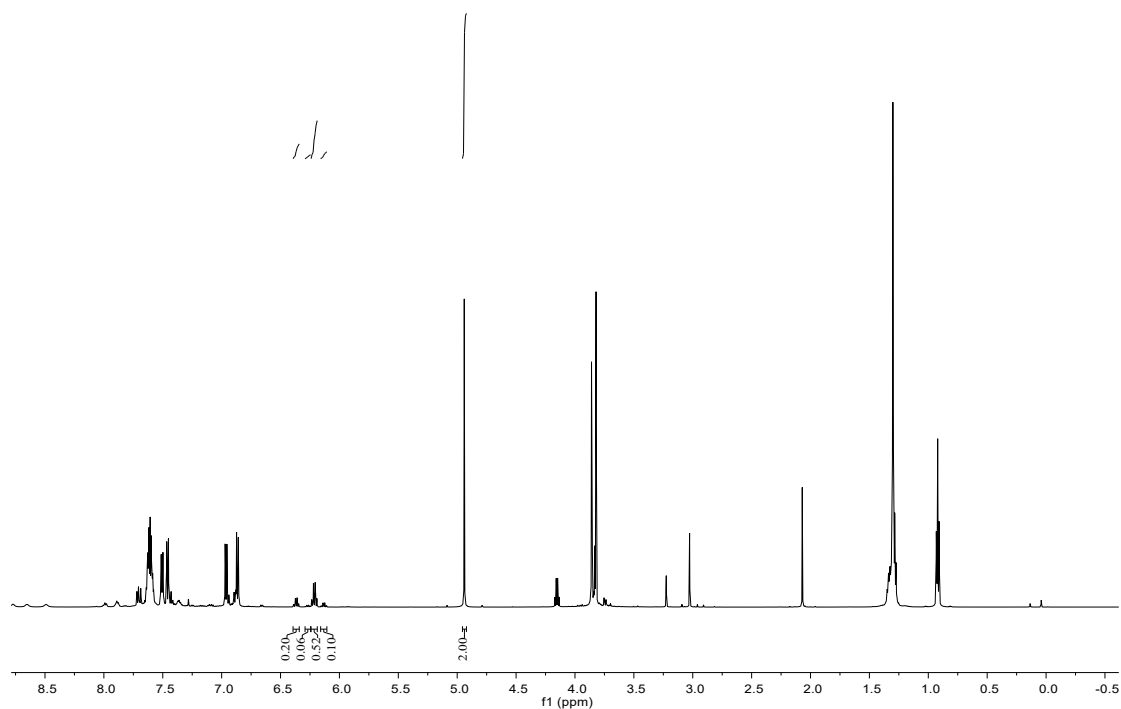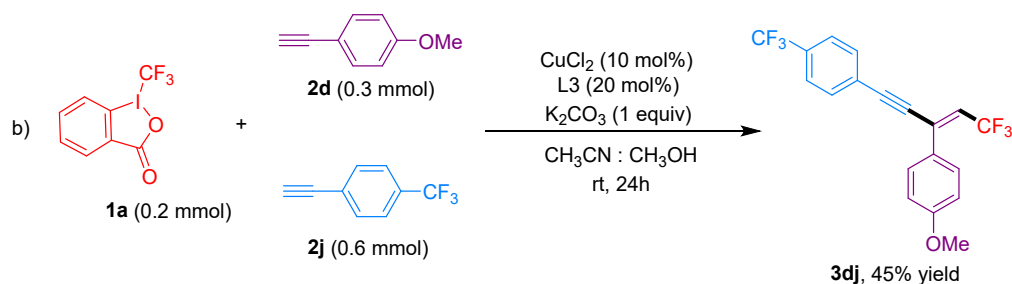

Flame-dried 10 mL Schlenk tube filled with argon, Togni's reagent II (**1a**) (0.2 mmol, 1.0 equiv), alkyne **2d** (0.3 mmol, 1.5 equiv), alkyne **2j** (0.6 mmol, 3.0 equiv), CuCl<sub>2</sub> (0.02 mmol, 10 mol%), 2,2':6',2''-terpyridine (0.04 mmol, 20 mol%), K<sub>2</sub>CO<sub>3</sub> (0.2 mmol, 1.0 equiv), absolute dry CH<sub>3</sub>CN (0.5 mL) and absolute dry CH<sub>3</sub>OH (0.5 mL) were added under N<sub>2</sub>. The formed mixture was stirred at room temperature under N<sub>2</sub> for 24 h as monitored by TLC. The solvent was removed under vacuum directly. The

crude product was purified by flash column chromatography on silica gel (eluent: PE/EA) to afford the product **3dj**.

**(E)-1-Methoxy-4-(5,5,5-trifluoro-1-(4-(trifluoromethyl)phenyl)pent-3-en-1-yn-3-yl)benzene:** colorless oil, 35.1 mg (48% yield). **<sup>1</sup>H NMR (600 MHz, CDCl<sub>3</sub>)** δ 7.60 (d, *J* = 8.2 Hz, 2H), 7.57 (d, *J* = 8.3 Hz, 2H), 7.47 (d, *J* = 8.5 Hz, 2H), 6.93 (d, *J* = 8.6 Hz, 2H), 6.18 (q, *J* = 8.7 Hz, 1H), 3.85 (s, 3H); **<sup>13</sup>C NMR (126 MHz, CDCl<sub>3</sub>)** δ 160.5, 134.3, 134.0 (q, *J* = 6.2 Hz), 133.5, 132.1, 130.8 (q, *J* = 32.8 Hz), 129.9 (d, *J* = 2.1 Hz), 127.0, 125.4 (q, *J* = 3.8 Hz), 122.4 (d, *J* = 270.6 Hz), 122.2 (q, *J* = 34.8 Hz), 113.7, 91.9, 90.8, 55.3; **<sup>19</sup>F NMR (376 MHz, CDCl<sub>3</sub>)** δ -56.3, -63.0; **ATR-FTIR (cm<sup>-1</sup>):** 2962, 2215, 1630, 1498, 1274, 1170, 1106, 1025, 749; **HRMS m/z (ESI)** calcd for C<sub>19</sub>H<sub>13</sub>F<sub>6</sub>O (M + H)<sup>+</sup> 371.0865, found 371.0869.

## 7. Computational Details

The DFT calculations were performed using the Gaussian 09 package<sup>[6]</sup>. Geometry optimizations of all the intermediates and transition states were carried out in gas phase with B3LYP<sup>[7]</sup> functional and a mixed basis set of SDD<sup>[8]</sup> for Cu and I atom and 6-31G\*<sup>[9]</sup> for all other atoms. Frequency computations were conducted at the same level theory to identify all the stationary points and to provide the thermal correction to free energies at 298.15 K and 1 atm pressure. In order to confirm the transition states, intrinsic reaction coordinate (IRC) calculations connected reactants and products were performed. Single-point solvation energies were calculated with M06<sup>[10]</sup> method and a mixed basis set of SDD (Cu and I) and 6-311+G(d,p)<sup>[11]</sup> for all other atoms with continuum model SMD<sup>[12]</sup> (solvent = methanol). All energies are reported here in kcal/mol. The calculated optimized structures are illustrated by CYLview.<sup>[13]</sup>

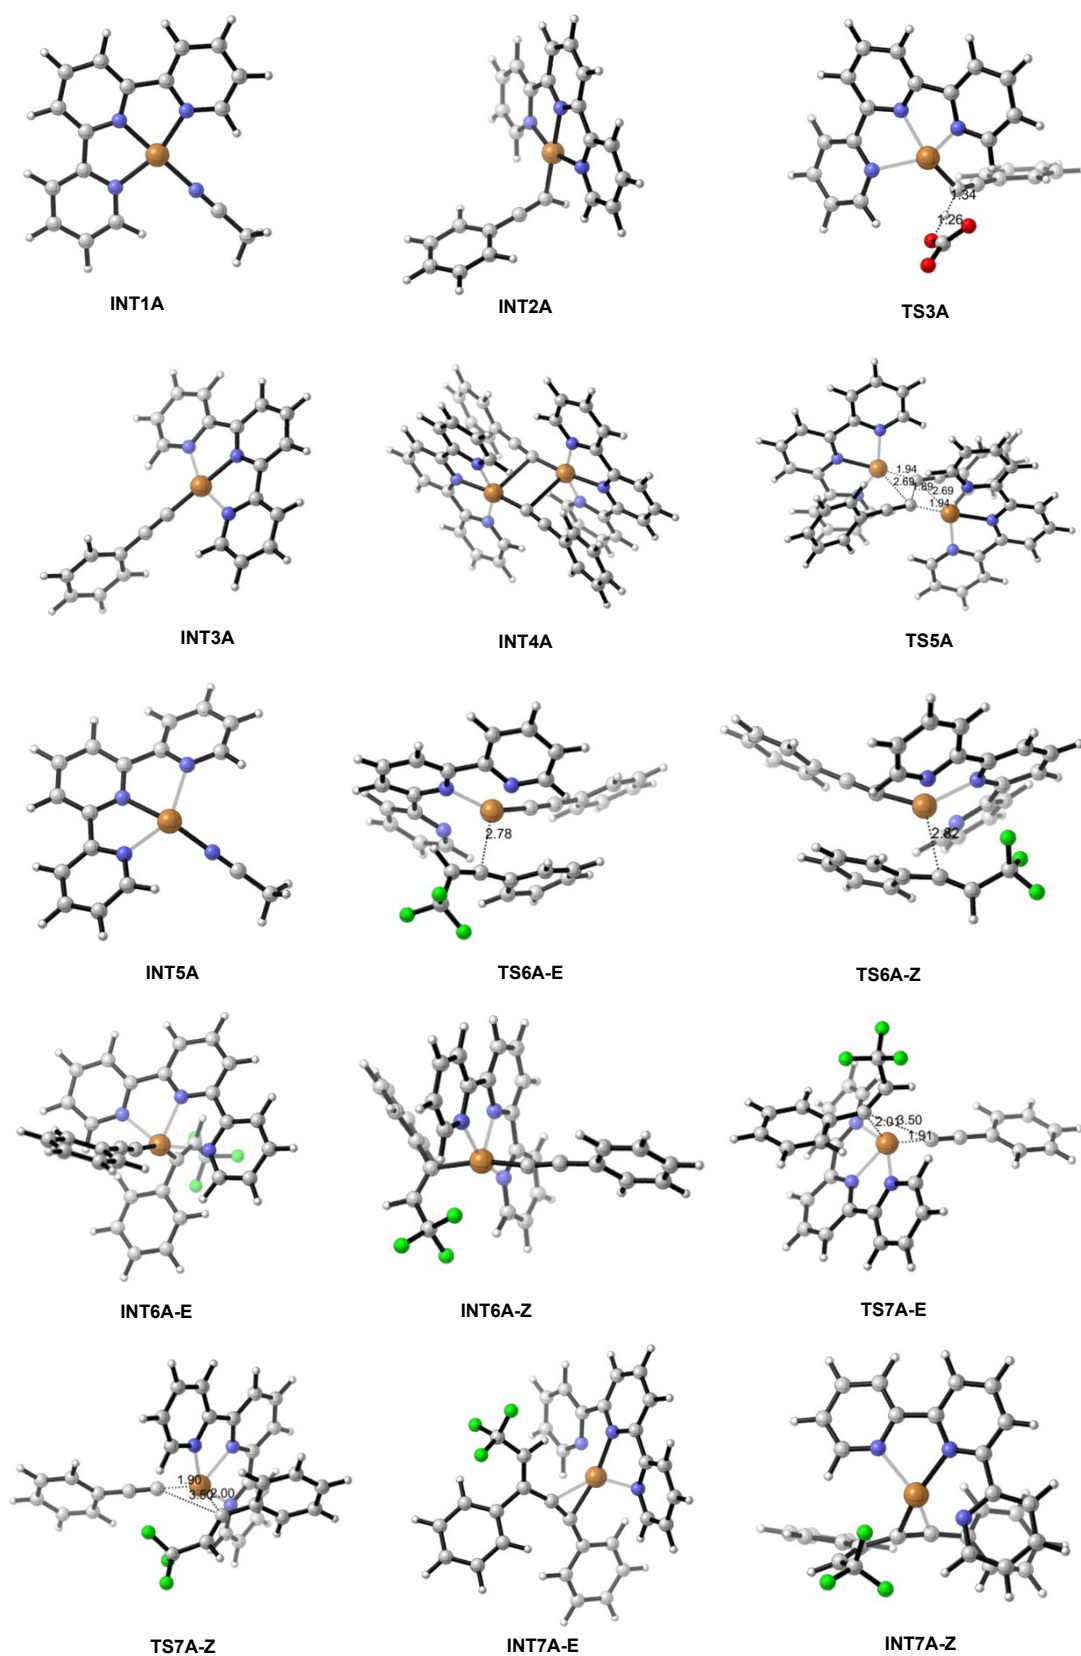

**Fig. S2** The calculated optimized structures of the key intermediates and TS. Distances are in Å.

**Cartesian coordinates of the optimized structures**

## INT1A

Charge = 2 Multiplicity = 2

$G_{sol} = -1071.748811$  Hartree

Zero-point correction = 0.279085 Hartree

Thermal correction to Energy = 0.298156 Hartree

Thermal correction to Enthalpy = 0.299100 Hartree

Thermal correction to Gibbs Free Energy = 0.229562 Hartree

|   |           |           |           |    |           |           |           |
|---|-----------|-----------|-----------|----|-----------|-----------|-----------|
| C | 1.187947  | 1.902853  | 0.004405  | C  | -2.343051 | 0.989245  | -0.001270 |
| C | -1.181473 | 1.906228  | 0.004011  | C  | -3.671797 | 1.403878  | -0.004795 |
| C | -1.209180 | 3.302207  | 0.014109  | C  | -2.995765 | -1.255010 | -0.007800 |
| C | 0.006163  | 3.991827  | 0.019073  | C  | -4.686936 | 0.443216  | -0.009433 |
| C | 1.219524  | 3.298781  | 0.014555  | H  | -3.920688 | 2.458978  | -0.004702 |
| C | 2.346952  | 0.982381  | -0.001057 | C  | -4.345899 | -0.907312 | -0.010676 |
| C | 2.992849  | -1.263990 | -0.007396 | H  | -2.681674 | -2.292176 | -0.009584 |
| C | 4.344023  | -0.920398 | -0.010828 | H  | -5.727780 | 0.751316  | -0.012372 |
| C | 4.689184  | 0.429128  | -0.009817 | H  | -5.103350 | -1.683381 | -0.014247 |
| C | 3.676962  | 1.392887  | -0.004967 | N  | -2.019253 | -0.335676 | -0.003091 |
| H | -2.146244 | 3.846470  | 0.019005  | N  | 0.002318  | 1.267713  | -0.001101 |
| H | 0.007719  | 5.077322  | 0.027169  | N  | -0.003267 | -2.656556 | -0.009640 |
| H | 2.158076  | 3.840482  | 0.019562  | C  | -0.007949 | -3.814080 | 0.007397  |
| H | 2.675467  | -2.300233 | -0.008800 | C  | -0.014077 | -5.268201 | 0.032704  |
| H | 5.099070  | -1.698799 | -0.014463 | H  | -0.241939 | -5.618897 | 1.045799  |
| H | 5.730970  | 0.734031  | -0.013029 | H  | -0.772526 | -5.647964 | -0.661280 |
| H | 3.929065  | 2.447237  | -0.005058 | H  | 0.968507  | -5.649023 | -0.268443 |
| N | 2.019245  | -0.341598 | -0.002521 | Cu | -0.000443 | -0.671875 | -0.005323 |

## 2a

Charge = 0 Multiplicity = 1

$G_{sol} = -308.150671$  Hartree

Zero-point correction = 0.109556 Hartree

Thermal correction to Energy = 0.116033 Hartree

Thermal correction to Enthalpy = 0.116977 Hartree

Thermal correction to Gibbs Free Energy = 0.079123 Hartree

|   |           |           |           |   |           |           |           |
|---|-----------|-----------|-----------|---|-----------|-----------|-----------|
| C | -1.512820 | -1.208866 | -0.000012 | H | 0.428631  | -2.150259 | 0.000021  |
| C | -0.119887 | -1.213400 | 0.000010  | H | 0.428696  | 2.150223  | 0.000022  |
| C | 0.594495  | -0.000022 | 0.000030  | H | -2.053255 | 2.151578  | -0.000023 |
| C | -0.119866 | 1.213390  | 0.000012  | H | -3.300021 | 0.000036  | -0.000041 |
| C | -1.512785 | 1.208889  | -0.000014 | C | 2.024444  | -0.000014 | 0.000068  |
| C | -2.213437 | 0.000013  | -0.000023 | C | 3.234619  | 0.000002  | 0.000014  |
| H | -2.053293 | -2.151554 | -0.000021 | H | 4.300666  | 0.000035  | -0.000458 |

## INT2A

Charge = 2 Multiplicity = 2

$G_{sol}$  = -1247.200840 Hartree

Zero-point correction = 0.342735 Hartree

Thermal correction to Energy = 0.364929 Hartree

Thermal correction to Enthalpy = 0.365873 Hartree

Thermal correction to Gibbs Free Energy = 0.287671 Hartree

|   |           |           |           |   |           |           |           |
|---|-----------|-----------|-----------|---|-----------|-----------|-----------|
| C | -2.611810 | -1.182136 | 0.564997  | H | -4.314576 | -2.151482 | 1.494507  |
| C | -2.611840 | 1.182070  | 0.564975  | H | 1.029089  | -2.695411 | -1.520048 |
| C | -3.835900 | 1.213847  | 1.237429  | H | 0.434426  | -5.115790 | -1.315255 |
| C | -4.440153 | -0.000047 | 1.573714  | H | -1.697253 | -5.729500 | -0.132753 |
| C | -3.835878 | -1.213936 | 1.237422  | H | -3.140436 | -3.916571 | 0.766338  |
| C | -1.821625 | -2.345958 | 0.098839  | N | -0.657474 | -2.028734 | -0.535326 |
| C | 0.118400  | -3.008403 | -1.021823 | C | -1.821687 | 2.345914  | 0.098813  |
| C | -0.219113 | -4.355887 | -0.901034 | C | -2.213751 | 3.672625  | 0.259649  |
| C | -1.402345 | -4.691095 | -0.246814 | C | 0.118296  | 3.008413  | -1.021888 |
| C | -2.213676 | -3.672680 | 0.259625  | C | -1.402448 | 4.691066  | -0.246798 |
| H | -4.314601 | 2.151385  | 1.494535  | H | -3.140489 | 3.916498  | 0.766409  |
| H | -5.391196 | -0.000065 | 2.096969  | C | -0.219234 | 4.355894  | -0.901057 |

|    |           |           |           |   |          |           |           |
|----|-----------|-----------|-----------|---|----------|-----------|-----------|
| H  | 1.028982  | 2.695459  | -1.520142 | C | 5.350900 | 1.222786  | 1.158063  |
| H  | -1.697370 | 5.729464  | -0.132701 | H | 3.783591 | 2.168711  | 0.026248  |
| H  | 0.434283  | 5.115810  | -1.315290 | C | 5.350898 | -1.222803 | 1.157837  |
| N  | -0.657551 | 2.028726  | -0.535398 | H | 3.783606 | -2.168488 | 0.025804  |
| N  | -2.048246 | -0.000025 | 0.265230  | C | 5.912212 | -0.000048 | 1.558292  |
| Cu | -0.309357 | 0.000002  | -0.650997 | H | 5.804079 | 2.156808  | 1.473571  |
| C  | 2.537380  | 0.000186  | -0.906716 | H | 5.804060 | -2.156888 | 1.473176  |
| C  | 3.640518  | 0.000119  | -0.059518 | H | 6.799183 | -0.000103 | 2.185212  |
| C  | 4.223704  | 1.232711  | 0.354188  | C | 1.497830 | -0.000019 | -1.614831 |
| C  | 4.223706  | -1.232552 | 0.353945  | H | 1.362560 | -0.000081 | -2.693064 |

MeCN

Charge = 0 Multiplicity = 1

$G_{sol} = -132.679750$  Hartree

Zero-point correction = 0.045643 Hartree

Thermal correction to Energy = 0.049235 Hartree

Thermal correction to Enthalpy = 0.050179 Hartree

Thermal correction to Gibbs Free Energy = 0.022666 Hartree

|   |          |           |           |   |           |           |           |
|---|----------|-----------|-----------|---|-----------|-----------|-----------|
| C | 0.000000 | 0.000000  | -1.181066 | H | -0.889070 | -0.513305 | -1.561123 |
| H | 0.000000 | 1.026609  | -1.561123 | C | 0.000000  | 0.000000  | 0.280614  |
| H | 0.889070 | -0.513305 | -1.561123 | N | 0.000000  | 0.000000  | 1.440869  |

CO<sub>3</sub><sup>2-</sup>

Charge = -2 Multiplicity = 1

$G_{sol} = -264.054151$  Hartree

Zero-point correction = 0.013998 Hartree

Thermal correction to Energy = 0.017190 Hartree

Thermal correction to Enthalpy = 0.018134 Hartree

Thermal correction to Gibbs Free Energy = -0.011582 Hartree

|   |          |           |          |   |           |           |          |
|---|----------|-----------|----------|---|-----------|-----------|----------|
| C | 0.000000 | -0.000136 | 0.000000 | O | -0.870773 | -0.982985 | 0.000000 |
|---|----------|-----------|----------|---|-----------|-----------|----------|

O -0.415740 1.245631 0.000000 O 1.286514 -0.262545 0.000000

### TS3A

Charge = 0 Multiplicity = 2

$G_{sol} = -1511.243037$  Hartree

Zero-point correction = 0.349663 Hartree

Thermal correction to Energy = 0.377381 Hartree

Thermal correction to Enthalpy = 0.378325 Hartree

Thermal correction to Gibbs Free Energy = 0.284100 Hartree

|   |           |           |           |    |           |           |           |
|---|-----------|-----------|-----------|----|-----------|-----------|-----------|
| C | -2.153202 | 1.687288  | -1.261851 | C  | -2.572526 | -4.310646 | -0.664059 |
| C | -2.713837 | -0.583064 | -1.372934 | H  | -3.471876 | -3.130443 | -2.230578 |
| C | -3.797425 | -0.311779 | -2.216331 | C  | -1.794836 | -4.265962 | 0.492942  |
| C | -4.031190 | 1.009918  | -2.596669 | H  | -0.718633 | -2.927062 | 1.832789  |
| C | -3.218445 | 2.030229  | -2.102237 | H  | -2.930572 | -5.258662 | -1.055308 |
| C | -1.277098 | 2.661957  | -0.559809 | H  | -1.540524 | -5.169536 | 1.037553  |
| C | 0.127597  | 2.976079  | 1.264215  | N  | -1.634160 | -1.880627 | 0.318860  |
| C | 0.296712  | 4.326588  | 0.955412  | N  | -1.898264 | 0.402628  | -0.966230 |
| C | -0.339979 | 4.841329  | -0.173719 | Cu | -0.379813 | -0.011433 | 0.392061  |
| C | -1.141246 | 3.999529  | -0.943654 | C  | 2.499763  | -0.604016 | 0.021494  |
| H | -4.463904 | -1.103491 | -2.540738 | C  | 3.682642  | -0.615349 | -0.773355 |
| H | -4.870977 | 1.249042  | -3.242470 | C  | 3.912146  | -1.644598 | -1.710819 |
| H | -3.432483 | 3.067101  | -2.337268 | C  | 4.652612  | 0.399791  | -0.632853 |
| H | 0.593694  | 2.514404  | 2.130405  | C  | 5.070647  | -1.652766 | -2.482968 |
| H | 0.915157  | 4.953360  | 1.589714  | H  | 3.170360  | -2.430127 | -1.818677 |
| H | -0.216065 | 5.883566  | -0.453635 | C  | 5.810871  | 0.382670  | -1.405303 |
| H | -1.637986 | 4.373564  | -1.833034 | H  | 4.482176  | 1.190966  | 0.090812  |
| N | -0.635182 | 2.162096  | 0.521432  | C  | 6.023502  | -0.640975 | -2.333135 |
| C | -2.403707 | -1.916272 | -0.792059 | H  | 5.233973  | -2.451703 | -3.201514 |
| C | -2.882934 | -3.119989 | -1.319155 | H  | 6.550982  | 1.169271  | -1.284083 |
| C | -1.338486 | -3.026917 | 0.945043  | H  | 6.928336  | -0.651368 | -2.934996 |



|   |          |           |          |   |           |           |          |
|---|----------|-----------|----------|---|-----------|-----------|----------|
| C | 1.477589 | -0.588008 | 0.715038 | C | 0.388388  | -0.382163 | 3.886473 |
| H | 1.060646 | -0.922486 | 1.939087 | O | 0.663119  | 0.843798  | 3.714462 |
| O | 0.647809 | -1.334071 | 3.060019 | O | -0.202155 | -0.601070 | 4.998705 |

### INT3A

Charge = 1 Multiplicity = 2

$G_{sol} = -1246.775497$  Hartree

Zero-point correction = 0.332098 Hartree

Thermal correction to Energy = 0.354007 Hartree

Thermal correction to Enthalpy = 0.354951 Hartree

Thermal correction to Gibbs Free Energy = 0.277244 Hartree

|   |           |           |           |    |           |           |           |
|---|-----------|-----------|-----------|----|-----------|-----------|-----------|
| C | -3.011378 | 1.180214  | -0.000126 | C  | -2.530554 | -3.682542 | -0.000284 |
| C | -3.012751 | -1.178441 | -0.000218 | C  | 0.135811  | -3.010051 | -0.000108 |
| C | -4.409837 | -1.210148 | -0.000307 | C  | -1.569538 | -4.697054 | -0.000268 |
| C | -5.101760 | 0.001998  | -0.000298 | H  | -3.586168 | -3.930026 | -0.000352 |
| C | -4.408504 | 1.213354  | -0.000207 | C  | -0.218002 | -4.360833 | -0.000180 |
| C | -2.104150 | 2.356130  | -0.000031 | H  | 1.167022  | -2.669984 | -0.000036 |
| C | 0.138592  | 3.009669  | 0.000046  | H  | -1.879889 | -5.737323 | -0.000325 |
| C | -0.214340 | 4.360680  | 0.000127  | H  | 0.554519  | -5.121928 | -0.000165 |
| C | -1.565647 | 4.697749  | 0.000121  | N  | -0.787330 | -2.043227 | -0.000123 |
| C | -2.527305 | 3.683858  | 0.000039  | N  | -2.367400 | 0.000523  | -0.000130 |
| H | -4.950641 | -2.149167 | -0.000379 | Cu | -0.371253 | -0.000697 | -0.000010 |
| H | -6.187255 | 0.002563  | -0.000364 | C  | 1.515871  | -0.001175 | 0.000089  |
| H | -4.948355 | 2.152908  | -0.000204 | C  | 2.742242  | -0.001210 | 0.000153  |
| H | 1.169584  | 2.668885  | 0.000039  | C  | 4.173285  | -0.001026 | 0.000242  |
| H | 0.558690  | 5.121260  | 0.000187  | C  | 4.889178  | -0.001055 | 1.213898  |
| H | -1.875307 | 5.738220  | 0.000178  | C  | 4.889328  | -0.000854 | -1.213325 |
| H | -3.582731 | 3.932104  | 0.000032  | C  | 6.282031  | -0.000852 | 1.209286  |
| N | -0.785132 | 2.043399  | -0.000031 | H  | 4.342605  | -0.001167 | 2.152258  |
| C | -2.106505 | -2.355121 | -0.000210 | C  | 6.282180  | -0.000654 | -1.208542 |

|   |          |           |           |   |          |           |           |
|---|----------|-----------|-----------|---|----------|-----------|-----------|
| H | 4.342870 | -0.000811 | -2.151752 | H | 6.822952 | -0.000519 | -2.150816 |
| C | 6.982727 | -0.000672 | 0.000415  | H | 8.068952 | -0.000567 | 0.000482  |
| H | 6.822688 | -0.000873 | 2.151627  |   |          |           |           |

·OCOOH

Charge = -1 Multiplicity = 1

$G_{sol} = -264.529001$  Hartree

Zero-point correction = 0.026267 Hartree

Thermal correction to Energy = 0.029785 Hartree

Thermal correction to Enthalpy = 0.030729 Hartree

Thermal correction to Gibbs Free Energy = 0.000490 Hartree

|   |           |           |           |   |           |          |           |
|---|-----------|-----------|-----------|---|-----------|----------|-----------|
| C | 0.158035  | -0.072913 | 0.000284  | O | -1.004158 | 0.799073 | -0.000013 |
| O | -0.141684 | -1.291655 | -0.000064 | H | -1.716907 | 0.139610 | -0.000301 |
| O | 1.241929  | 0.529815  | -0.000097 |   |           |          |           |

**INT4A**

Charge = 2 Multiplicity = 3

$G_{sol} = -2493.552649$  Hartree

Zero-point correction = 0.664465 Hartree

Thermal correction to Energy = 0.709600 Hartree

Thermal correction to Enthalpy = 0.710544 Hartree

Thermal correction to Gibbs Free Energy = 0.580206 Hartree

|   |           |           |          |   |           |           |          |
|---|-----------|-----------|----------|---|-----------|-----------|----------|
| C | -3.786330 | 1.181228  | 1.397235 | C | -2.384882 | 4.689440  | 1.800995 |
| C | -3.790189 | -1.170441 | 1.395469 | C | -3.327340 | 3.674949  | 1.624685 |
| C | -5.186878 | -1.201539 | 1.367532 | H | -5.728413 | -2.140013 | 1.372620 |
| C | -5.879693 | 0.008865  | 1.343029 | H | -6.964694 | 0.010678  | 1.319098 |
| C | -5.182868 | 1.216976  | 1.369224 | H | -5.721321 | 2.157224  | 1.375579 |
| C | -2.887105 | 2.356510  | 1.502199 | H | 0.371289  | 2.696652  | 1.741032 |
| C | -0.663080 | 3.023259  | 1.707414 | H | -0.272089 | 5.119951  | 2.008715 |
| C | -1.031257 | 4.361456  | 1.851212 | H | -2.709698 | 5.719500  | 1.910969 |

|    |           |           |           |    |           |           |           |
|----|-----------|-----------|-----------|----|-----------|-----------|-----------|
| H  | -4.384933 | 3.911936  | 1.602126  | C  | 5.879673  | 0.013916  | -1.343259 |
| N  | -1.566419 | 2.053268  | 1.531693  | C  | 5.187580  | -1.196878 | -1.368863 |
| C  | -2.894892 | -2.348885 | 1.498379  | C  | 2.896264  | -2.345456 | -1.500865 |
| C  | -3.339585 | -3.666114 | 1.617779  | C  | 0.674947  | -3.021254 | -1.705410 |
| C  | -0.673183 | -3.023546 | 1.702425  | C  | 1.048435  | -4.358160 | -1.847421 |
| C  | -2.400579 | -4.684169 | 1.791901  | C  | 2.403342  | -4.680743 | -1.796683 |
| H  | -4.397962 | -3.899469 | 1.594384  | C  | 3.341747  | -3.662294 | -1.621611 |
| C  | -1.045872 | -4.360820 | 1.843073  | H  | 5.720044  | 2.162212  | -1.373818 |
| H  | 0.362280  | -2.700549 | 1.736954  | H  | 6.964673  | 0.016354  | -1.319291 |
| H  | -2.728845 | -5.713397 | 1.899382  | H  | 5.729669  | -2.135026 | -1.374734 |
| H  | -0.289274 | -5.122232 | 1.998869  | H  | -0.360721 | -2.698867 | -1.739499 |
| N  | -1.573207 | -2.050102 | 1.528832  | H  | 0.292280  | -5.119870 | -2.003910 |
| N  | -3.139081 | 0.004320  | 1.384852  | H  | 2.732215  | -5.709666 | -1.905219 |
| Cu | -1.144273 | 0.001024  | 1.283899  | H  | 4.400269  | -3.895017 | -1.598524 |
| C  | 0.776061  | -0.002121 | 1.444115  | N  | 1.574399  | -2.047446 | -1.530919 |
| C  | 1.962337  | -0.006760 | 1.775244  | C  | 2.885668  | 2.359936  | -1.499993 |
| C  | 3.331224  | -0.012188 | 2.193452  | C  | 3.325082  | 3.678774  | -1.621104 |
| C  | 4.011419  | -1.228311 | 2.414935  | C  | 0.661210  | 3.025568  | -1.704158 |
| C  | 4.019012  | 1.198222  | 2.422488  | C  | 2.381991  | 4.692893  | -1.796122 |
| C  | 5.334356  | -1.230123 | 2.850939  | H  | 4.382538  | 3.916372  | -1.598477 |
| H  | 3.484637  | -2.165805 | 2.261474  | C  | 1.028558  | 4.364147  | -1.846491 |
| C  | 5.341960  | 1.188887  | 2.858349  | H  | -0.372964 | 2.698377  | -1.738035 |
| H  | 3.498179  | 2.139990  | 2.275016  | H  | 2.706164  | 5.723275  | -1.904969 |
| C  | 6.004031  | -0.023387 | 3.073049  | H  | 0.268910  | 5.122368  | -2.002995 |
| H  | 5.841086  | -2.173681 | 3.032612  | N  | 1.565154  | 2.055917  | -1.529622 |
| H  | 5.854676  | 2.128069  | 3.045812  | N  | 3.139078  | 0.007794  | -1.385178 |
| H  | 7.031483  | -0.027666 | 3.424737  | Cu | 1.144321  | 0.003150  | -1.284002 |
| C  | 3.790874  | -1.166570 | -1.396846 | C  | -0.776079 | -0.000941 | -1.443642 |
| C  | 3.785624  | 1.185105  | -1.396365 | C  | -1.962379 | -0.004732 | -1.774704 |
| C  | 5.182137  | 1.221646  | -1.368340 | C  | -3.331225 | -0.009377 | -2.193047 |

|   |           |           |           |   |           |           |           |
|---|-----------|-----------|-----------|---|-----------|-----------|-----------|
| C | -4.018657 | 1.201489  | -2.420788 | H | -3.485207 | -2.162876 | -2.263628 |
| C | -4.011691 | -1.225054 | -2.416093 | C | -6.003855 | -0.018808 | -3.073193 |
| C | -5.341513 | 1.193042  | -2.856946 | H | -5.853932 | 2.132583  | -3.043414 |
| H | -3.497599 | 2.142938  | -2.272076 | H | -5.841507 | -2.169182 | -3.035224 |
| C | -5.334545 | -1.225980 | -2.852353 | H | -7.031232 | -0.022426 | -3.425108 |

## TS5A

Charge = 2 Multiplicity = 3

$G_{sol} = -2493.512978$  Hartree

Zero-point correction = 0.660716 Hartree

Thermal correction to Energy = 0.707139 Hartree

Thermal correction to Enthalpy = 0.708083 Hartree

Thermal correction to Gibbs Free Energy = 0.569140 Hartree

|   |           |           |           |    |           |           |           |
|---|-----------|-----------|-----------|----|-----------|-----------|-----------|
| C | -4.622873 | -0.997333 | -0.847941 | N  | -2.493736 | -2.049556 | -1.172081 |
| C | -4.493068 | 1.345672  | -0.939662 | C  | -3.554230 | 2.480109  | -1.152068 |
| C | -5.881462 | 1.462008  | -0.821881 | C  | -3.955586 | 3.816048  | -1.224377 |
| C | -6.639347 | 0.297524  | -0.701188 | C  | -1.344855 | 3.068329  | -1.577161 |
| C | -6.015433 | -0.949117 | -0.727379 | C  | -3.000883 | 4.797228  | -1.493570 |
| C | -3.817333 | -2.242179 | -0.968398 | H  | -4.993678 | 4.094394  | -1.083870 |
| C | -1.693035 | -3.105106 | -1.350925 | C  | -1.672019 | 4.420590  | -1.679852 |
| C | -2.168431 | -4.416533 | -1.337320 | H  | -0.327708 | 2.711439  | -1.707149 |
| C | -3.528139 | -4.626679 | -1.114628 | H  | -3.296952 | 5.839367  | -1.563459 |
| C | -4.364890 | -3.526511 | -0.925891 | H  | -0.904021 | 5.152304  | -1.906718 |
| H | -6.369437 | 2.429208  | -0.836111 | N  | -2.258741 | 2.126815  | -1.320593 |
| H | -7.718966 | 0.361105  | -0.608450 | N  | -3.908351 | 0.137089  | -0.918546 |
| H | -6.607439 | -1.854528 | -0.668691 | Cu | -1.883403 | 0.021804  | -1.016310 |
| H | -0.644329 | -2.876218 | -1.514551 | C  | 0.051753  | -0.087305 | -0.945035 |
| H | -1.489121 | -5.245632 | -1.504208 | C  | 1.111298  | -0.147385 | -1.617291 |
| H | -3.937826 | -5.631806 | -1.094051 | C  | 2.249657  | -0.229218 | -2.453231 |
| H | -5.425046 | -3.675075 | -0.756198 | C  | 2.888299  | 0.943735  | -2.928620 |

|   |          |           |           |    |           |           |          |
|---|----------|-----------|-----------|----|-----------|-----------|----------|
| C | 2.759182 | -1.487747 | -2.860727 | N  | 2.258743  | 2.126769  | 1.320637 |
| C | 3.985238 | 0.854803  | -3.778325 | C  | 3.817328  | -2.242221 | 0.968347 |
| H | 2.499077 | 1.914342  | -2.635265 | C  | 4.364883  | -3.526551 | 0.925823 |
| C | 3.856805 | -1.562519 | -3.711248 | C  | 1.693025  | -3.105152 | 1.350836 |
| H | 2.271054 | -2.393621 | -2.513760 | C  | 3.528131  | -4.626722 | 1.114530 |
| C | 4.474551 | -0.395292 | -4.173906 | H  | 5.425041  | -3.675112 | 0.756138 |
| H | 4.456294 | 1.762119  | -4.145374 | C  | 2.168420  | -4.416579 | 1.337211 |
| H | 4.227907 | -2.533595 | -4.026159 | H  | 0.644317  | -2.876266 | 1.514455 |
| H | 5.324965 | -0.459095 | -4.845878 | H  | 3.937817  | -5.631848 | 1.093938 |
| C | 4.493071 | 1.345630  | 0.939693  | H  | 1.489107  | -5.245680 | 1.504075 |
| C | 4.622871 | -0.997372 | 0.847919  | N  | 2.493730  | -2.049599 | 1.172019 |
| C | 6.015429 | -0.949156 | 0.727352  | N  | 3.908351  | 0.137050  | 0.918552 |
| C | 6.639346 | 0.297485  | 0.701188  | Cu | 1.883403  | 0.021766  | 1.016310 |
| C | 5.881464 | 1.461967  | 0.821909  | C  | -0.051753 | -0.087337 | 0.945037 |
| C | 3.554234 | 2.480064  | 1.152124  | C  | -1.111298 | -0.147449 | 1.617293 |
| C | 1.344859 | 3.068280  | 1.577226  | C  | -2.249654 | -0.229315 | 2.453232 |
| C | 1.672026 | 4.420537  | 1.679951  | C  | -2.759163 | -1.487859 | 2.860702 |
| C | 3.000891 | 4.797177  | 1.493682  | C  | -2.888313 | 0.943620  | 2.928643 |
| C | 3.955593 | 3.816001  | 1.224468  | C  | -3.856784 | -1.562662 | 3.711222 |
| H | 6.607433 | -1.854568 | 0.668639  | H  | -2.271023 | -2.393719 | 2.513718 |
| H | 7.718964 | 0.361066  | 0.608447  | C  | -3.985251 | 0.854657  | 3.778346 |
| H | 6.369440 | 2.429165  | 0.836158  | H  | -2.499105 | 1.914239  | 2.635307 |
| H | 0.327711 | 2.711390  | 1.707203  | C  | -4.474546 | -0.395453 | 4.173904 |
| H | 0.904030 | 5.152248  | 1.906833  | H  | -4.227873 | -2.533750 | 4.026114 |
| H | 3.296962 | 5.839313  | 1.563598  | H  | -4.456319 | 1.761959  | 4.145413 |
| H | 4.993687 | 4.094347  | 1.083971  | H  | -5.324959 | -0.459281 | 4.845873 |

## INT5A

Charge = 1 Multiplicity = 1

$G_{sol}$  = -1071.920259 Hartree

Zero-point correction = 0.276553 Hartree

Thermal correction to Energy = 0.296731 Hartree

Thermal correction to Enthalpy = 0.297675 Hartree

Thermal correction to Gibbs Free Energy = 0.223992 Hartree

|   |           |           |           |    |           |           |           |
|---|-----------|-----------|-----------|----|-----------|-----------|-----------|
| C | -1.169466 | -1.824812 | 0.173174  | C  | 2.380284  | -0.977003 | -0.000955 |
| C | 1.170262  | -1.824381 | 0.173234  | C  | 3.669298  | -1.416704 | 0.318272  |
| C | 1.205741  | -3.219113 | 0.279837  | C  | 3.200787  | 1.057048  | -0.740575 |
| C | 0.000779  | -3.915662 | 0.349864  | C  | 4.751698  | -0.571662 | 0.080031  |
| C | -1.204436 | -3.219556 | 0.279764  | H  | 3.827270  | -2.393647 | 0.761544  |
| C | -2.379796 | -0.977875 | -0.001028 | C  | 4.517726  | 0.688600  | -0.468132 |
| C | -3.201026 | 1.055943  | -0.740468 | H  | 2.969454  | 2.031894  | -1.161460 |
| C | -4.517841 | 0.686971  | -0.468145 | H  | 5.760000  | -0.893072 | 0.322387  |
| C | -4.751369 | -0.573444 | 0.079858  | H  | 5.331705  | 1.373897  | -0.679739 |
| C | -3.668664 | -1.418097 | 0.318079  | N  | 2.154464  | 0.252818  | -0.515541 |
| H | 2.147823  | -3.754859 | 0.273612  | N  | 0.000277  | -1.162428 | 0.162193  |
| H | 0.000975  | -4.998810 | 0.422205  | N  | -0.000542 | 2.724572  | 0.293824  |
| H | -2.146320 | -3.755650 | 0.273477  | C  | -0.001022 | 3.849349  | 0.569382  |
| H | -2.970038 | 2.030938  | -1.161195 | C  | -0.001863 | 5.263537  | 0.922572  |
| H | -5.332065 | 1.371990  | -0.679712 | H  | 0.920724  | 5.516810  | 1.454450  |
| H | -5.759566 | -0.895262 | 0.322111  | H  | -0.070550 | 5.875768  | 0.017714  |
| H | -3.826291 | -2.395144 | 0.761244  | H  | -0.856588 | 5.486644  | 1.569048  |
| N | -2.154413 | 0.252080  | -0.515477 | Cu | -0.000055 | 0.860358  | -0.179975 |

1,4-diphenylbuta-1,3-diyne

Charge = 0 Multiplicity = 1

$G_{sol}$  = -615.129484 Hartree

Zero-point correction = 0.202810 Hartree

Thermal correction to Energy = 0.215714 Hartree

Thermal correction to Enthalpy = 0.216658 Hartree

Thermal correction to Gibbs Free Energy = 0.159861 Hartree

|   |           |           |           |   |          |           |           |
|---|-----------|-----------|-----------|---|----------|-----------|-----------|
| C | -5.432715 | -0.854626 | -0.855685 | C | 0.680044 | -0.000086 | 0.000155  |
| C | -4.040492 | -0.858531 | -0.859598 | C | 1.901304 | 0.000037  | 0.000045  |
| C | -3.324185 | 0.000029  | 0.000015  | C | 3.324188 | 0.000015  | -0.000001 |
| C | -4.040568 | 0.858580  | 0.859570  | C | 4.040519 | 0.859841  | -0.858328 |
| C | -5.432787 | 0.854612  | 0.855605  | C | 4.040534 | -0.859804 | 0.858309  |
| C | -6.133227 | -0.000021 | -0.000057 | C | 5.432738 | 0.855884  | -0.854419 |
| H | -5.973379 | -1.520691 | -1.522565 | H | 3.492189 | 1.522908  | -1.520185 |
| H | -3.492146 | -1.520578 | -1.522462 | C | 5.432758 | -0.855877 | 0.854349  |
| H | -3.492279 | 1.520655  | 1.522455  | H | 3.492223 | -1.522845 | 1.520207  |
| H | -5.973513 | 1.520655  | 1.522457  | C | 6.133222 | -0.000007 | -0.000050 |
| H | -7.219734 | -0.000042 | -0.000080 | H | 5.973431 | 1.522934  | -1.520291 |
| C | -1.901295 | -0.000007 | 0.000072  | H | 5.973458 | -1.522926 | 1.520216  |
| C | -0.680035 | -0.000049 | 0.000071  | H | 7.219730 | -0.000012 | -0.000071 |

### 1a

Charge = 0 Multiplicity = 1

$G_{sol} = -768.329427$  Hartree

Zero-point correction = 0.106697 Hartree

Thermal correction to Energy = 0.119480 Hartree

Thermal correction to Enthalpy = 0.120425 Hartree

Thermal correction to Gibbs Free Energy = 0.065331 Hartree

|   |           |          |           |   |           |           |           |
|---|-----------|----------|-----------|---|-----------|-----------|-----------|
| C | -0.521174 | 1.992036 | -0.000326 | H | -1.417032 | 3.943012  | -0.000335 |
| C | -0.822956 | 0.640380 | -0.000180 | C | -2.361211 | -1.392682 | 0.000083  |
| C | -2.096181 | 0.108274 | 0.000025  | O | -1.282428 | -2.123129 | -0.000307 |
| C | -3.162357 | 1.017995 | 0.000138  | I | 0.703886  | -0.946453 | -0.000183 |
| C | -2.919709 | 2.389289 | 0.000018  | C | 2.443654  | 0.555843  | 0.000229  |
| C | -1.608537 | 2.873801 | -0.000225 | F | 3.557984  | -0.190088 | 0.000473  |
| H | 0.491476  | 2.371309 | -0.000532 | F | 2.453990  | 1.342156  | -1.085939 |
| H | -4.165908 | 0.604462 | 0.000311  | F | 2.453473  | 1.342109  | 1.086430  |
| H | -3.752156 | 3.086787 | 0.000094  | O | -3.512637 | -1.801971 | 0.000670  |

2-iodobenzoate

Charge = -1 Multiplicity = 1

$G_{sol} = -430.941827$  Hartree

Zero-point correction = 0.091170 Hartree

Thermal correction to Energy = 0.099890 Hartree

Thermal correction to Enthalpy = 0.100835 Hartree

Thermal correction to Gibbs Free Energy = 0.054504 Hartree

|   |           |           |          |   |           |           |           |
|---|-----------|-----------|----------|---|-----------|-----------|-----------|
| C | -0.664977 | -1.964542 | 0.030984 | H | -3.434842 | 0.713664  | -0.033640 |
| C | -0.368981 | -0.598824 | 0.026537 | H | -4.056404 | -1.718718 | 0.068402  |
| C | -1.344040 | 0.392143  | 0.021029 | H | -2.234433 | -3.438401 | 0.079883  |
| C | -2.677562 | -0.063107 | 0.018585 | O | -0.111764 | 2.352094  | 0.614695  |
| C | -3.011111 | -1.413325 | 0.056305 | I | 1.782067  | -0.149872 | -0.049569 |
| C | -1.997683 | -2.376095 | 0.061545 | C | -1.145548 | 1.956613  | 0.041314  |
| H | 0.134003  | -2.699547 | 0.012815 | O | -2.088042 | 2.584034  | -0.494454 |

CF<sub>3</sub> radical

Charge = 0 Multiplicity = 2

$G_{sol} = -337.552367$  Hartree

Zero-point correction = 0.012167 Hartree

Thermal correction to Energy = 0.015619 Hartree

Thermal correction to Enthalpy = 0.016564 Hartree

Thermal correction to Gibbs Free Energy = -0.013521 Hartree

|   |          |          |           |   |           |           |           |
|---|----------|----------|-----------|---|-----------|-----------|-----------|
| C | 0.000000 | 0.000000 | 0.329152  | F | -1.094981 | -0.632187 | -0.073145 |
| F | 0.000000 | 1.264375 | -0.073145 | F | 1.094981  | -0.632187 | -0.073145 |

radical A

Charge = 0 Multiplicity = 2

$G_{sol} = -645.758267$  Hartree

Zero-point correction = 0.125025 Hartree



Thermal correction to Energy = 0.135386 Hartree

Thermal correction to Enthalpy = 0.136330 Hartree

Thermal correction to Gibbs Free Energy = 0.085709 Hartree

|   |          |           |           |   |           |           |           |
|---|----------|-----------|-----------|---|-----------|-----------|-----------|
| C | 3.215444 | 1.212311  | 0.142919  | H | 3.739858  | -2.156776 | 0.263818  |
| C | 1.866560 | 1.229846  | -0.167539 | H | 4.958819  | -0.004244 | 0.544405  |
| C | 1.145981 | 0.002086  | -0.334196 | C | -0.191285 | 0.004025  | -0.643633 |
| C | 1.862877 | -1.228029 | -0.169082 | C | -1.458732 | 0.001657  | -0.943154 |
| C | 3.211795 | -1.214937 | 0.141384  | H | -1.825933 | 0.001149  | -1.973047 |
| C | 3.900796 | -0.002466 | 0.300070  | C | -2.560854 | -0.000116 | 0.085460  |
| H | 3.746349 | 2.152401  | 0.266530  | F | -3.352138 | -1.088136 | -0.060364 |
| H | 1.335940 | 2.168971  | -0.287282 | F | -3.358352 | 1.083044  | -0.062844 |
| H | 1.329425 | -2.165388 | -0.290008 | F | -2.093949 | 0.002605  | 1.345676  |

### TS6A-E

Charge = 1 Multiplicity = 1

$G_{sol}$  = -1892.495563 Hartree

Zero-point correction = 0.456663 Hartree

Thermal correction to Energy = 0.490962 Hartree

Thermal correction to Enthalpy = 0.491906 Hartree

Thermal correction to Gibbs Free Energy = 0.383729 Hartree

|   |           |           |           |   |           |           |           |
|---|-----------|-----------|-----------|---|-----------|-----------|-----------|
| C | -2.239187 | 1.168636  | -1.917192 | H | -3.990902 | -2.146077 | -2.722570 |
| C | -2.239227 | -1.168274 | -1.917348 | H | -5.136728 | 0.000320  | -3.251290 |
| C | -3.505259 | -1.199934 | -2.514763 | H | -3.990828 | 2.146608  | -2.722281 |
| C | -4.145850 | 0.000274  | -2.807770 | H | 0.981653  | 3.201783  | 0.395877  |
| C | -3.505218 | 1.200420  | -2.514602 | H | 0.669245  | 5.439105  | -0.678951 |
| C | -1.484785 | 2.408896  | -1.597226 | H | -1.101084 | 5.673953  | -2.450231 |
| C | 0.210110  | 3.357630  | -0.352805 | H | -2.457102 | 3.682002  | -3.057566 |
| C | 0.040086  | 4.601202  | -0.960663 | N | -0.537418 | 2.289255  | -0.649351 |
| C | -0.944429 | 4.728795  | -1.939442 | C | -1.484870 | -2.408603 | -1.597544 |
| C | -1.714980 | 3.616092  | -2.269839 | C | -1.715112 | -3.615704 | -2.270311 |

|   |           |           |           |    |           |           |           |
|---|-----------|-----------|-----------|----|-----------|-----------|-----------|
| C | 0.209988  | -3.357561 | -0.353244 | C  | 2.001640  | 0.000013  | -0.309102 |
| C | -0.944606 | -4.728479 | -1.940054 | Cu | 0.116494  | 0.000039  | -0.444722 |
| H | -2.457237 | -3.681483 | -3.058046 | C  | -1.456867 | -0.000131 | 1.847081  |
| C | 0.039913  | -4.601050 | -0.961258 | C  | -0.195198 | -0.000148 | 2.354298  |
| H | 0.981538  | -3.201842 | 0.395457  | C  | 0.505089  | 1.242854  | 2.562551  |
| H | -1.101298 | -5.673567 | -2.450963 | C  | 0.505104  | -1.243167 | 2.562402  |
| H | 0.669038  | -5.439013 | -0.679651 | C  | 1.866570  | 1.227995  | 2.724652  |
| N | -0.537497 | -2.289119 | -0.649654 | H  | -0.055271 | 2.169878  | 2.519641  |
| N | -1.634919 | 0.000150  | -1.608969 | C  | 1.866585  | -1.228312 | 2.724502  |
| C | 3.245534  | -0.000007 | -0.288296 | H  | -0.055245 | -2.170192 | 2.519381  |
| C | 4.666103  | -0.000030 | -0.331269 | C  | 2.564073  | -0.000152 | 2.684122  |
| C | 5.388343  | 1.215905  | -0.354587 | H  | 2.419563  | 2.155571  | 2.832422  |
| C | 5.388301  | -1.215988 | -0.354640 | H  | 2.419589  | -2.155895 | 2.832157  |
| C | 6.778330  | 1.211380  | -0.399346 | H  | 3.647645  | -0.000149 | 2.738408  |
| H | 4.840266  | 2.153196  | -0.344714 | C  | -2.736541 | -0.000148 | 1.620151  |
| C | 6.778289  | -1.211508 | -0.399398 | H  | -3.158147 | -0.000107 | 0.618788  |
| H | 4.840193  | -2.153261 | -0.344809 | C  | -3.756517 | -0.000238 | 2.741598  |
| C | 7.477750  | -0.000075 | -0.420518 | F  | -4.542439 | -1.087245 | 2.644543  |
| H | 7.321081  | 2.152076  | -0.420782 | F  | -3.177088 | -0.000250 | 3.950727  |
| H | 7.321008  | -2.152222 | -0.420874 | F  | -4.542552 | 1.086694  | 2.644617  |
| H | 8.563292  | -0.000093 | -0.456465 |    |           |           |           |

### TS6A-Z

Charge = 1 Multiplicity = 1

$G_{sol} = -1892.489936$  Hartree

Zero-point correction = 0.456456 Hartree

Thermal correction to Energy = 0.490649 Hartree

Thermal correction to Enthalpy = 0.491594 Hartree

Thermal correction to Gibbs Free Energy = 0.384409 Hartree

|   |          |           |           |   |          |          |           |
|---|----------|-----------|-----------|---|----------|----------|-----------|
| C | 2.247457 | -1.120816 | -1.687828 | C | 2.224612 | 1.210452 | -1.661157 |
|---|----------|-----------|-----------|---|----------|----------|-----------|

|   |           |           |           |    |           |           |           |
|---|-----------|-----------|-----------|----|-----------|-----------|-----------|
| C | 3.420819  | 1.265068  | -2.385927 | C  | -5.207642 | 1.198537  | -0.842530 |
| C | 4.037327  | 0.074769  | -2.758044 | C  | -6.556271 | -1.233884 | -1.148618 |
| C | 3.444465  | -1.135565 | -2.413244 | H  | -4.655517 | -2.169230 | -0.750165 |
| C | 1.534147  | -2.365727 | -1.298823 | C  | -6.566561 | 1.189632  | -1.136657 |
| C | -0.094178 | -3.318313 | 0.030281  | H  | -4.673808 | 2.137138  | -0.728801 |
| C | 0.076029  | -4.573051 | -0.552364 | C  | -7.245559 | -0.024305 | -1.289346 |
| C | 1.026269  | -4.706079 | -1.563165 | H  | -7.082609 | -2.176079 | -1.271871 |
| C | 1.758531  | -3.586393 | -1.949102 | H  | -7.100908 | 2.128481  | -1.250624 |
| H | 3.877401  | 2.216645  | -2.630354 | H  | -8.306958 | -0.027675 | -1.519908 |
| H | 4.976124  | 0.090192  | -3.302997 | C  | -1.889030 | -0.007213 | -0.153435 |
| H | 3.919653  | -2.072116 | -2.679234 | Cu | 0.001286  | -0.000596 | 0.012421  |
| H | -0.845103 | -3.160073 | 0.797965  | C  | 1.282824  | -0.033491 | 2.522631  |
| H | -0.527885 | -5.413892 | -0.227588 | C  | -0.066218 | -0.034914 | 2.743654  |
| H | 1.184081  | -5.660228 | -2.056644 | C  | -0.791465 | -1.275706 | 2.833578  |
| H | 2.470767  | -3.658736 | -2.762906 | C  | -0.791577 | 1.203693  | 2.858042  |
| N | 0.622581  | -2.243510 | -0.315152 | C  | -2.165010 | -1.261717 | 2.863515  |
| C | 1.487875  | 2.432321  | -1.244053 | H  | -0.230637 | -2.203341 | 2.845518  |
| C | 1.684001  | 3.669538  | -1.871991 | C  | -2.165156 | 1.188738  | 2.888497  |
| C | -0.152280 | 3.325458  | 0.110761  | H  | -0.230961 | 2.131063  | 2.887190  |
| C | 0.930899  | 4.766324  | -1.461262 | C  | -2.857729 | -0.035699 | 2.795813  |
| H | 2.390259  | 3.771836  | -2.687821 | H  | -2.722375 | -2.192282 | 2.900872  |
| C | -0.011026 | 4.594378  | -0.448563 | H  | -2.722720 | 2.118242  | 2.944899  |
| H | -0.895587 | 3.137616  | 0.879256  | H  | -3.942273 | -0.035416 | 2.760387  |
| H | 1.066407  | 5.732740  | -1.937197 | C  | 2.562256  | -0.040424 | 2.769769  |
| H | -0.630315 | 5.416256  | -0.104721 | H  | 2.896908  | -0.052875 | 3.810433  |
| N | 0.584266  | 2.272197  | -0.258569 | C  | 3.684913  | -0.034994 | 1.757519  |
| N | 1.669016  | 0.035114  | -1.314189 | F  | 3.643071  | -1.120045 | 0.956979  |
| C | -3.106480 | -0.011093 | -0.404468 | F  | 3.641201  | 1.055795  | 0.965315  |
| C | -4.496054 | -0.015539 | -0.695968 | F  | 4.866892  | -0.036511 | 2.391246  |
| C | -5.197309 | -1.234108 | -0.854581 |    |           |           |           |

## INT6A-E

Charge = 1 Multiplicity = 1

$G_{sol} = -1892.508173$  Hartree

Zero-point correction = 0.459230 Hartree

Thermal correction to Energy = 0.493189 Hartree

Thermal correction to Enthalpy = 0.494133 Hartree

Thermal correction to Gibbs Free Energy = 0.386577 Hartree

|   |           |           |           |    |           |           |           |
|---|-----------|-----------|-----------|----|-----------|-----------|-----------|
| C | -0.760983 | 1.523505  | -2.312491 | H  | -0.585832 | -3.318577 | -3.790145 |
| C | -0.767043 | -0.792918 | -2.653556 | C  | 0.366568  | -4.395263 | -0.721819 |
| C | -1.312564 | -0.642559 | -3.935019 | H  | 0.557118  | -3.050073 | 0.967175  |
| C | -1.580769 | 0.648282  | -4.391575 | H  | 0.087868  | -5.399765 | -2.613997 |
| C | -1.306434 | 1.751389  | -3.582585 | H  | 0.691322  | -5.273579 | -0.174398 |
| C | -0.403789 | 2.584373  | -1.329233 | N  | -0.113972 | -2.049697 | -0.702243 |
| C | 0.311331  | 3.045899  | 0.831668  | N  | -0.512721 | 0.278626  | -1.898961 |
| C | 0.399352  | 4.412179  | 0.568915  | C  | 3.141249  | -0.049243 | 0.290409  |
| C | 0.062242  | 4.864585  | -0.705332 | C  | 4.562916  | -0.054355 | 0.330435  |
| C | -0.335495 | 3.939653  | -1.668525 | C  | 5.282710  | 1.146536  | 0.521092  |
| H | -1.541135 | -1.499657 | -4.557636 | C  | 5.283927  | -1.259755 | 0.176463  |
| H | -2.013946 | 0.794379  | -5.376170 | C  | 6.673127  | 1.138520  | 0.552092  |
| H | -1.530261 | 2.752615  | -3.931767 | H  | 4.733810  | 2.075373  | 0.642367  |
| H | 0.585697  | 2.637541  | 1.799120  | C  | 6.674349  | -1.259307 | 0.208912  |
| H | 0.731765  | 5.094174  | 1.344129  | H  | 4.735978  | -2.185799 | 0.031785  |
| H | 0.122711  | 5.919634  | -0.953675 | C  | 7.373335  | -0.062371 | 0.396800  |
| H | -0.566623 | 4.267912  | -2.675437 | H  | 7.215365  | 2.068367  | 0.698438  |
| N | -0.098313 | 2.162635  | -0.083589 | H  | 7.217597  | -2.192290 | 0.088588  |
| C | -0.417536 | -2.093802 | -2.016999 | H  | 8.459227  | -0.065557 | 0.422901  |
| C | -0.356124 | -3.294955 | -2.731039 | C  | 1.908005  | -0.056038 | 0.334145  |
| C | 0.285865  | -3.161427 | -0.077834 | Cu | 0.018075  | -0.025496 | 0.150117  |
| C | 0.032435  | -4.460141 | -2.073167 | C  | -1.857377 | -0.110672 | 0.772165  |

|   |           |           |          |   |           |           |           |
|---|-----------|-----------|----------|---|-----------|-----------|-----------|
| C | -1.510453 | -0.317911 | 2.155164 | H | -0.896520 | -2.832365 | 4.392093  |
| C | -1.312583 | 0.786264  | 3.026898 | H | -0.532257 | -0.880795 | 5.883448  |
| C | -1.343913 | -1.631698 | 2.670076 | C | -2.971772 | -0.003167 | 0.070591  |
| C | -0.969038 | 0.578274  | 4.355571 | H | -2.972704 | 0.152074  | -1.003627 |
| H | -1.474618 | 1.789870  | 2.649641 | C | -4.359716 | -0.078459 | 0.654820  |
| C | -1.000777 | -1.824850 | 4.001037 | F | -5.044921 | -1.097159 | 0.093447  |
| H | -1.529014 | -2.479166 | 2.019232 | F | -4.366530 | -0.259062 | 1.985969  |
| C | -0.802605 | -0.723756 | 4.843593 | F | -5.036926 | 1.058022  | 0.385902  |
| H | -0.839913 | 1.427052  | 5.020196 |   |           |           |           |

### INT6A-Z

Charge = 1 Multiplicity = 1

$G_{sol} = -1892.497331$  Hartree

Zero-point correction = 0.459367 Hartree

Thermal correction to Energy = 0.492924 Hartree

Thermal correction to Enthalpy = 0.493868 Hartree

Thermal correction to Gibbs Free Energy = 0.389281 Hartree

|   |           |           |           |   |           |           |           |
|---|-----------|-----------|-----------|---|-----------|-----------|-----------|
| C | -0.454488 | 1.356063  | -1.990857 | H | 0.002384  | 2.557495  | 2.305228  |
| C | -0.435686 | -0.983675 | -2.178375 | H | -0.009756 | 5.021843  | 1.862048  |
| C | -0.533098 | -0.916154 | -3.574301 | H | -0.261616 | 5.805081  | -0.516684 |
| C | -0.593847 | 0.351383  | -4.160769 | H | -0.477329 | 4.110955  | -2.321389 |
| C | -0.552369 | 1.510097  | -3.379823 | N | -0.235813 | 2.040927  | 0.326090  |
| C | -0.361642 | 2.437726  | -0.966324 | C | -0.328106 | -2.213712 | -1.339479 |
| C | -0.109836 | 2.948999  | 1.300563  | C | -0.314462 | -3.502996 | -1.877506 |
| C | -0.114811 | 4.318628  | 1.043136  | C | -0.100709 | -3.082190 | 0.819581  |
| C | -0.253590 | 4.746617  | -0.275688 | C | -0.187058 | -4.602284 | -1.030196 |
| C | -0.376484 | 3.797089  | -1.288553 | H | -0.397393 | -3.646144 | -2.948922 |
| H | -0.555505 | -1.804443 | -4.195301 | C | -0.077706 | -4.391505 | 0.342802  |
| H | -0.666580 | 0.437339  | -5.240502 | H | -0.025690 | -2.861981 | 1.878392  |
| H | -0.589062 | 2.485600  | -3.851253 | H | -0.171825 | -5.607627 | -1.439498 |

|    |           |           |           |   |           |           |           |
|----|-----------|-----------|-----------|---|-----------|-----------|-----------|
| H  | 0.024509  | -5.216401 | 1.039415  | C | -2.208323 | -0.238573 | 2.509157  |
| N  | -0.224423 | -2.029364 | 0.002158  | H | -3.217419 | -0.322292 | 2.915097  |
| N  | -0.412902 | 0.137174  | -1.469967 | C | -3.088293 | -0.023732 | 0.207060  |
| C  | 2.998227  | -0.004046 | 0.192736  | C | -3.617095 | -1.196766 | -0.369637 |
| C  | 4.407060  | 0.010032  | -0.010733 | C | -3.635377 | 1.221260  | -0.165814 |
| C  | 5.124348  | 1.226691  | 0.008715  | C | -4.667000 | -1.123832 | -1.282298 |
| C  | 5.113172  | -1.191740 | -0.239293 | H | -3.218848 | -2.162440 | -0.072996 |
| C  | 6.499532  | 1.237227  | -0.199880 | C | -4.684987 | 1.286705  | -1.079254 |
| H  | 4.587284  | 2.152399  | 0.191238  | H | -3.249577 | 2.129501  | 0.287491  |
| C  | 6.488421  | -1.172372 | -0.447000 | C | -5.201074 | 0.116495  | -1.643768 |
| H  | 4.567307  | -2.130221 | -0.247883 | H | -5.079216 | -2.036660 | -1.702934 |
| C  | 7.185619  | 0.040000  | -0.428337 | H | -5.110998 | 2.250843  | -1.341973 |
| H  | 7.040993  | 2.178757  | -0.182074 | H | -6.023086 | 0.169916  | -2.351494 |
| H  | 7.021216  | -2.102862 | -0.621022 | C | -1.140350 | -0.350272 | 3.550943  |
| H  | 8.259924  | 0.051469  | -0.588251 | F | 0.022931  | 0.257447  | 3.159481  |
| C  | 1.800252  | -0.026137 | 0.480480  | F | -0.815866 | -1.641038 | 3.814693  |
| Cu | -0.102013 | -0.030471 | 0.609331  | F | -1.515751 | 0.212999  | 4.706425  |
| C  | -2.013772 | -0.098740 | 1.195934  |   |           |           |           |

### TS7A-E

Charge = 1 Multiplicity = 1

$G_{sol} = -1892.492336$  Hartree

Zero-point correction = 0.457709 Hartree

Thermal correction to Energy = 0.491436 Hartree

Thermal correction to Enthalpy = 0.492380 Hartree

Thermal correction to Gibbs Free Energy = 0.385125 Hartree

|   |           |           |          |   |           |           |           |
|---|-----------|-----------|----------|---|-----------|-----------|-----------|
| C | -1.434139 | -2.642333 | 0.049796 | C | -2.309575 | -3.630413 | 0.517042  |
| C | -1.436101 | -1.569104 | 2.126768 | C | -0.895963 | -2.588737 | -1.338567 |
| C | -2.311389 | -2.522590 | 2.661288 | C | 0.257334  | -1.319014 | -2.904175 |
| C | -2.745037 | -3.561143 | 1.839185 | C | 0.182397  | -2.330093 | -3.861685 |

|   |           |           |           |    |           |           |           |
|---|-----------|-----------|-----------|----|-----------|-----------|-----------|
| C | -0.458722 | -3.519210 | -3.517179 | C  | 6.918351  | 0.427136  | 1.145315  |
| C | -1.001528 | -3.653767 | -2.240529 | H  | 4.979800  | 0.880998  | 1.971352  |
| H | -2.663107 | -2.454123 | 3.683984  | C  | 7.614955  | -0.143451 | 0.072863  |
| H | -3.430393 | -4.309400 | 2.225189  | H  | 7.460774  | -1.143940 | -1.833743 |
| H | -2.659933 | -4.425150 | -0.130981 | H  | 7.464522  | 0.858812  | 1.978831  |
| H | 0.756687  | -0.377166 | -3.113131 | H  | 8.701091  | -0.152844 | 0.076728  |
| H | 0.620164  | -2.185087 | -4.843555 | C  | 2.151270  | -0.093396 | 0.051733  |
| H | -0.529045 | -4.336661 | -4.228223 | Cu | 0.245537  | -0.103607 | 0.056197  |
| H | -1.480105 | -4.581823 | -1.949121 | C  | -0.972440 | 1.315127  | -0.679976 |
| N | -0.272016 | -1.443530 | -1.683614 | C  | -0.208357 | 2.277693  | -1.173876 |
| C | -0.900842 | -0.404586 | 2.886628  | H  | 0.875460  | 2.239754  | -1.151276 |
| C | -1.007461 | -0.285377 | 4.277071  | C  | -2.384378 | 1.076722  | -0.561412 |
| C | 0.246521  | 1.610486  | 2.757364  | C  | -3.096962 | 1.532987  | 0.574244  |
| C | -0.468332 | 0.835376  | 4.906206  | C  | -3.090627 | 0.416216  | -1.596118 |
| H | -1.484003 | -1.061461 | 4.865154  | C  | -4.472934 | 1.360896  | 0.651644  |
| C | 0.170110  | 1.806351  | 4.135943  | H  | -2.560022 | 2.042057  | 1.367071  |
| H | 0.744018  | 2.327390  | 2.110355  | C  | -4.466610 | 0.249833  | -1.507369 |
| H | -0.539458 | 0.942151  | 5.984303  | H  | -2.548875 | 0.068283  | -2.468754 |
| H | 0.604857  | 2.692486  | 4.585928  | C  | -5.160953 | 0.717367  | -0.384610 |
| N | -0.279117 | 0.541186  | 2.152470  | H  | -5.016497 | 1.735954  | 1.513643  |
| N | -1.023406 | -1.654517 | 0.855529  | H  | -5.005302 | -0.234849 | -2.316112 |
| C | 3.393758  | -0.101928 | 0.055159  | H  | -6.237167 | 0.586447  | -0.320387 |
| C | 4.807033  | -0.117915 | 0.062217  | C  | -0.743566 | 3.536792  | -1.822958 |
| C | 5.527534  | -0.692062 | -1.014427 | F  | -0.298530 | 4.619044  | -1.152786 |
| C | 5.529646  | 0.441985  | 1.144924  | F  | -2.084000 | 3.593359  | -1.860018 |
| C | 6.916241  | -0.702133 | -1.004472 | F  | -0.286775 | 3.626190  | -3.088506 |
| H | 4.976058  | -1.122804 | -1.844113 |    |           |           |           |

### TS7A-Z

Charge = 1 Multiplicity = 1

$G_{sol} = -1892.482089$  Hartree

Zero-point correction = 0.457723 Hartree

Thermal correction to Energy = 0.491164 Hartree

Thermal correction to Enthalpy = 0.492108 Hartree

Thermal correction to Gibbs Free Energy = 0.387714 Hartree

|   |           |           |           |    |           |           |           |
|---|-----------|-----------|-----------|----|-----------|-----------|-----------|
| C | 1.999047  | -1.052637 | -2.025189 | H  | 0.886923  | 5.821349  | -1.398645 |
| C | 1.946228  | 1.282972  | -1.928267 | H  | -0.510618 | 5.266292  | 0.617317  |
| C | 2.942744  | 1.383506  | -2.907188 | N  | 0.548219  | 2.173361  | -0.183154 |
| C | 3.465692  | 0.209545  | -3.446339 | N  | 1.504817  | 0.085547  | -1.520665 |
| C | 2.997088  | -1.027399 | -3.007248 | C  | -3.072243 | -0.005738 | -0.505398 |
| C | 1.410190  | -2.300372 | -1.461575 | C  | -4.456487 | 0.003678  | -0.758769 |
| C | 0.050418  | -3.207749 | 0.191099  | C  | -5.170463 | -1.213287 | -0.913614 |
| C | 0.214739  | -4.499923 | -0.307507 | C  | -5.164301 | 1.230228  | -0.855168 |
| C | 1.010854  | -4.675948 | -1.438338 | C  | -6.537463 | -1.198044 | -1.151175 |
| C | 1.612661  | -3.564795 | -2.026518 | H  | -4.628700 | -2.150672 | -0.839908 |
| H | 3.317979  | 2.346626  | -3.232790 | C  | -6.531274 | 1.233376  | -1.093100 |
| H | 4.245161  | 0.258364  | -4.200477 | H  | -4.617780 | 2.160309  | -0.737225 |
| H | 3.414269  | -1.942378 | -3.411155 | C  | -7.220426 | 0.022243  | -1.241207 |
| H | -0.569439 | -3.006116 | 1.059815  | H  | -7.078827 | -2.132208 | -1.266619 |
| H | -0.274155 | -5.337790 | 0.178106  | H  | -7.067871 | 2.174718  | -1.163958 |
| H | 1.155882  | -5.663672 | -1.865225 | H  | -8.290628 | 0.029410  | -1.426802 |
| H | 2.212552  | -3.682883 | -2.921788 | C  | -1.842922 | -0.014495 | -0.297005 |
| N | 0.638192  | -2.144119 | -0.366366 | Cu | 0.021524  | -0.020868 | 0.062230  |
| C | 1.303368  | 2.452818  | -1.265041 | C  | 0.932397  | -0.074971 | 1.840886  |
| C | 1.441675  | 3.766241  | -1.728722 | C  | 0.221278  | -0.140064 | 2.961605  |
| C | -0.085749 | 3.159441  | 0.458913  | H  | 0.760802  | -0.160613 | 3.910442  |
| C | 0.792084  | 4.796979  | -1.051433 | C  | 2.377449  | -0.042088 | 1.711975  |
| H | 2.028169  | 3.983570  | -2.614220 | C  | 3.075256  | 1.188140  | 1.713876  |
| C | 0.013450  | 4.493760  | 0.064645  | C  | 3.117742  | -1.245869 | 1.649725  |
| H | -0.689540 | 2.859058  | 1.310576  | C  | 4.464899  | 1.207772  | 1.678068  |



|   |          |           |          |   |           |           |          |
|---|----------|-----------|----------|---|-----------|-----------|----------|
| H | 2.515259 | 2.115020  | 1.769914 | H | 6.270667  | 0.028451  | 1.595641 |
| C | 4.507168 | -1.215843 | 1.613891 | C | -1.271831 | -0.189804 | 3.142127 |
| H | 2.589937 | -2.193221 | 1.656690 | F | -1.835480 | -1.255839 | 2.527553 |
| C | 5.185116 | 0.008766  | 1.622959 | F | -1.889855 | 0.920524  | 2.677451 |
| H | 4.991648 | 2.157210  | 1.704144 | F | -1.559243 | -0.287490 | 4.453553 |
| H | 5.066405 | -2.146568 | 1.589982 |   |           |           |          |

### INT7A-E

Charge = 1 Multiplicity = 1

$G_{sol} = -1892.610083$  Hartree

Zero-point correction = 0.460794 Hartree

Thermal correction to Energy = 0.494375 Hartree

Thermal correction to Enthalpy = 0.495319 Hartree

Thermal correction to Gibbs Free Energy = 0.388611 Hartree

|   |          |           |           |   |           |           |           |
|---|----------|-----------|-----------|---|-----------|-----------|-----------|
| C | 3.343649 | -0.064154 | -1.091082 | H | 4.030678  | 0.867868  | -3.617911 |
| C | 2.973222 | -1.419255 | 0.783428  | N | 1.959825  | 1.896949  | -1.150072 |
| C | 4.164650 | -2.116916 | 0.555313  | C | 2.110904  | -1.618391 | 1.978845  |
| C | 4.941330 | -1.773475 | -0.549589 | C | 2.147193  | -2.779511 | 2.757938  |
| C | 4.544945 | -0.721884 | -1.374339 | C | 0.510767  | -0.673682 | 3.357222  |
| C | 2.865560 | 1.141713  | -1.817430 | C | 1.329277  | -2.862441 | 3.883959  |
| C | 1.517489 | 3.026508  | -1.720233 | H | 2.784495  | -3.612828 | 2.482784  |
| C | 1.946507 | 3.462291  | -2.973178 | C | 0.498929  | -1.787726 | 4.197231  |
| C | 2.864050 | 2.678294  | -3.670358 | H | -0.128945 | 0.182149  | 3.555542  |
| C | 3.330453 | 1.502054  | -3.085677 | H | 1.338341  | -3.755284 | 4.501535  |
| H | 4.498717 | -2.885271 | 1.242747  | H | -0.148201 | -1.807741 | 5.067737  |
| H | 5.873555 | -2.294998 | -0.742920 | N | 1.294425  | -0.582582 | 2.276336  |
| H | 5.176576 | -0.401016 | -2.194450 | N | 2.568366  | -0.455449 | -0.063439 |
| H | 0.797343 | 3.599834  | -1.143701 | C | -1.019364 | 1.410158  | 0.522486  |
| H | 1.564719 | 4.389720  | -3.386535 | C | -1.276599 | 2.724614  | 1.047686  |
| H | 3.210688 | 2.973444  | -4.655912 | C | -0.263250 | 3.508287  | 1.633142  |

|    |           |           |           |   |           |           |           |
|----|-----------|-----------|-----------|---|-----------|-----------|-----------|
| C  | -2.591766 | 3.231674  | 0.980142  | C | -5.138666 | 0.271369  | -1.637976 |
| C  | -0.559199 | 4.772943  | 2.136880  | H | -3.114180 | 0.980901  | -1.820118 |
| H  | 0.749747  | 3.119128  | 1.697251  | C | -5.426653 | -1.807926 | -0.440054 |
| C  | -2.875581 | 4.496236  | 1.486809  | H | -3.629796 | -2.726092 | 0.308506  |
| H  | -3.374233 | 2.625713  | 0.533901  | C | -5.974362 | -0.732286 | -1.141620 |
| C  | -1.863294 | 5.269333  | 2.064297  | H | -5.558060 | 1.105914  | -2.192571 |
| H  | 0.226974  | 5.369678  | 2.589766  | H | -6.071844 | -2.588866 | -0.048474 |
| H  | -3.890101 | 4.879852  | 1.433044  | H | -7.047191 | -0.675522 | -1.300945 |
| H  | -2.091619 | 6.254844  | 2.459099  | C | -0.923160 | -2.005909 | -0.710010 |
| C  | -1.177126 | 0.274579  | 0.040101  | H | 0.125735  | -1.943210 | -0.443117 |
| Cu | 0.901890  | 0.660725  | 0.337245  | C | -1.305383 | -3.334283 | -1.289670 |
| C  | -1.729202 | -0.941365 | -0.496354 | F | -0.214354 | -3.899074 | -1.855283 |
| C  | -3.204059 | -0.884029 | -0.733574 | F | -1.738268 | -4.194201 | -0.331044 |
| C  | -3.762494 | 0.202430  | -1.426855 | F | -2.262029 | -3.262651 | -2.228473 |
| C  | -4.049547 | -1.887308 | -0.236135 |   |           |           |           |

### INT7A-Z

Charge = 1 Multiplicity = 1

$G_{sol}$  = -1892.613420 Hartree

Zero-point correction = 0.460724 Hartree

Thermal correction to Energy = 0.494325 Hartree

Thermal correction to Enthalpy = 0.495269 Hartree

Thermal correction to Gibbs Free Energy = 0.389129 Hartree

|   |          |           |           |   |          |           |           |
|---|----------|-----------|-----------|---|----------|-----------|-----------|
| C | 3.094246 | 1.351780  | 0.013319  | C | 3.707914 | -2.336899 | 1.992100  |
| C | 1.442567 | 2.934495  | -0.482140 | C | 4.781932 | -1.798651 | 1.286303  |
| C | 2.404209 | 3.873077  | -0.871371 | C | 4.604478 | -0.599204 | 0.598770  |
| C | 3.748272 | 3.506683  | -0.828622 | H | 2.122179 | 4.875685  | -1.170016 |
| C | 4.106317 | 2.244136  | -0.362372 | H | 4.515384 | 4.217711  | -1.119400 |
| C | 3.353207 | 0.026053  | 0.639045  | H | 5.151289 | 1.976264  | -0.260474 |
| C | 2.486601 | -1.660993 | 1.959664  | H | 1.618840 | -2.045098 | 2.486104  |

|   |           |           |           |    |           |           |           |
|---|-----------|-----------|-----------|----|-----------|-----------|-----------|
| H | 3.806150  | -3.258694 | 2.556099  | H  | 1.954014  | -1.447592 | -4.821108 |
| H | 5.744962  | -2.299998 | 1.271262  | H  | 2.872187  | -4.565520 | -1.999275 |
| H | 5.424808  | -0.168674 | 0.035187  | H  | 3.202573  | -3.512059 | -4.224998 |
| N | 2.306513  | -0.512256 | 1.298732  | C  | -1.124392 | -1.061595 | 0.025911  |
| C | -0.011922 | 3.231970  | -0.372925 | Cu | 0.270574  | 0.405792  | 0.400176  |
| C | -0.595587 | 4.388955  | -0.898149 | C  | -2.456285 | -1.079766 | 0.596969  |
| C | -2.043844 | 2.559388  | 0.521740  | C  | -2.645690 | -1.159720 | 1.934589  |
| C | -1.952767 | 4.624006  | -0.685757 | H  | -3.642813 | -1.264991 | 2.345011  |
| H | -0.006162 | 5.094675  | -1.472259 | C  | -3.605007 | -1.022922 | -0.351237 |
| C | -2.692320 | 3.698653  | 0.047795  | C  | -3.490759 | -1.541476 | -1.651773 |
| H | -2.578566 | 1.804735  | 1.089162  | C  | -4.834880 | -0.468251 | 0.047947  |
| H | -2.421655 | 5.517369  | -1.086631 | C  | -4.583104 | -1.530759 | -2.517719 |
| H | -3.748062 | 3.846959  | 0.247549  | H  | -2.551374 | -1.973576 | -1.980426 |
| N | -0.741566 | 2.322674  | 0.316704  | C  | -5.922804 | -0.453805 | -0.821403 |
| N | 1.801492  | 1.696608  | -0.100895 | H  | -4.937620 | -0.029003 | 1.036016  |
| C | -0.197263 | -1.364518 | -0.743061 | C  | -5.802125 | -0.988968 | -2.106399 |
| C | 0.743074  | -1.923923 | -1.668828 | H  | -4.481320 | -1.949403 | -3.514670 |
| C | 0.933808  | -1.331409 | -2.934094 | H  | -6.863755 | -0.018765 | -0.497360 |
| C | 1.453847  | -3.094953 | -1.336561 | H  | -6.650993 | -0.977580 | -2.783671 |
| C | 1.816460  | -1.904139 | -3.845397 | C  | -1.550761 | -1.170382 | 2.952959  |
| H | 0.380739  | -0.433142 | -3.191824 | F  | -0.785712 | -0.035912 | 2.908395  |
| C | 2.333771  | -3.658261 | -2.256900 | F  | -0.687760 | -2.206269 | 2.786119  |
| H | 1.300451  | -3.555407 | -0.366075 | F  | -2.052876 | -1.256248 | 4.191960  |
| C | 2.517827  | -3.066134 | -3.509627 |    |           |           |           |

***E-3aa***

Charge = 0 Multiplicity = 1

$G_{sol} = -953.373189$  Hartree

Zero-point correction = 0.230367 Hartree

Thermal correction to Energy = 0.247129 Hartree

Thermal correction to Enthalpy = 0.248073 Hartree

Thermal correction to Gibbs Free Energy = 0.182394 Hartree

|   |           |           |           |   |          |           |           |
|---|-----------|-----------|-----------|---|----------|-----------|-----------|
| C | -5.302347 | 1.112721  | -0.192042 | C | 2.842378 | -1.948288 | 0.087604  |
| C | -3.912105 | 1.042144  | -0.173398 | F | 3.452635 | -1.951295 | -1.131251 |
| C | -3.265334 | -0.204398 | -0.049013 | F | 3.540487 | -1.102906 | 0.871116  |
| C | -4.046900 | -1.373056 | 0.055233  | F | 3.001134 | -3.192572 | 0.594200  |
| C | -5.436583 | -1.292434 | 0.034483  | C | 1.498113 | 0.914139  | -0.000586 |
| C | -6.068304 | -0.051799 | -0.088564 | C | 2.615098 | 1.155068  | -0.815554 |
| H | -5.790430 | 2.078603  | -0.288769 | C | 1.002641 | 1.958278  | 0.797062  |
| H | -3.312247 | 1.943174  | -0.256066 | C | 3.231183 | 2.405728  | -0.815510 |
| H | -3.551323 | -2.334103 | 0.151556  | H | 2.994258 | 0.367354  | -1.456421 |
| H | -6.029033 | -2.199622 | 0.114989  | C | 1.628169 | 3.203442  | 0.804373  |
| H | -7.153074 | 0.007271  | -0.104078 | H | 0.127589 | 1.785076  | 1.416398  |
| C | -1.842894 | -0.280837 | -0.030005 | C | 2.744484 | 3.431740  | -0.003358 |
| C | -0.628338 | -0.353432 | -0.019073 | H | 4.091253 | 2.578650  | -1.456559 |
| C | 0.798184  | -0.405933 | -0.004431 | H | 1.240466 | 3.997023  | 1.437391  |
| C | 1.384162  | -1.629014 | -0.003635 | H | 3.227589 | 4.405097  | -0.004799 |
| H | 0.757000  | -2.511984 | -0.061750 |   |          |           |           |

### Z-3aa

Charge = 0 Multiplicity = 1

$G_{sol}$  = -953.378799 Hartree

Zero-point correction = 0.230119 Hartree

Thermal correction to Energy = 0.247009 Hartree

Thermal correction to Enthalpy = 0.247953 Hartree

Thermal correction to Gibbs Free Energy = 0.181187 Hartree

|   |          |           |           |   |          |           |           |
|---|----------|-----------|-----------|---|----------|-----------|-----------|
| C | 4.395846 | -2.351079 | 0.273300  | C | 4.887669 | -0.015963 | -0.135225 |
| C | 3.031823 | -2.071240 | 0.265145  | C | 5.325941 | -1.327010 | 0.073758  |
| C | 2.581690 | -0.753121 | 0.055244  | H | 4.735133 | -3.370290 | 0.436374  |
| C | 3.526589 | 0.274464  | -0.145489 | H | 2.304802 | -2.862239 | 0.421652  |

|   |           |           |           |   |           |           |           |
|---|-----------|-----------|-----------|---|-----------|-----------|-----------|
| H | 3.171184  | 1.287259  | -0.308150 | C | -2.389825 | -0.677847 | -0.013371 |
| H | 5.609144  | 0.781380  | -0.290579 | C | -2.135139 | -1.955770 | -0.536116 |
| H | 6.389342  | -1.549966 | 0.081500  | C | -3.664335 | -0.408197 | 0.512576  |
| C | 1.193992  | -0.435935 | 0.040353  | C | -3.134495 | -2.927392 | -0.558165 |
| C | 0.032053  | -0.078934 | 0.011625  | H | -1.149566 | -2.178704 | -0.932976 |
| C | -1.321574 | 0.362470  | -0.024451 | C | -4.661143 | -1.381553 | 0.493595  |
| C | -1.616500 | 1.684096  | -0.083644 | H | -3.867863 | 0.557418  | 0.965585  |
| H | -2.643068 | 2.021425  | -0.161907 | C | -4.401875 | -2.643810 | -0.045985 |
| C | -0.597518 | 2.780838  | -0.046879 | H | -2.921420 | -3.907891 | -0.975252 |
| F | 0.063803  | 2.839189  | 1.133222  | H | -5.638425 | -1.157485 | 0.912392  |
| F | 0.347108  | 2.665144  | -1.010331 | H | -5.179087 | -3.403011 | -0.057262 |
| F | -1.203063 | 3.977668  | -0.223891 |   |           |           |           |

## 8. References

- [ ] Matoušek, V.; Pietrasiak, E.; Schwenk, R.; Togni, A. *J. Org. Chem.*, **2013**, *78*, 6763.
- [2] Le, C.; Chen, T. Q.; Liang, T.; Zhang, P.; MacMillan, D. W. C. *Science*, **2018**, *360*, 1010.
- [3] Siah, H.-S. M.; Fiksdahl, A. *J. Fluorine Chem.*, **2017**, *197*, 24.
- [4] Tresse, C.; Guissart, C.; Schweizer, S.; Bouhoute, Y.; Chany, A.-C.; Goddard, M.-L.; Blanchard, N.; Evano, G. *Adv. Synth. Catal.*, **2014**, *356*, 2051.
- [5] Weng, Y.; Min, L.; Zeng, X.; Shan, L.; Wang, X.; Hu, Y. *Org. Lett.*, **2020**, *22*, 8296.
- [6] Gaussian 09, Revision E.01, Frisch, M. J.; Trucks, G. W.; Schlegel, H. B.; Scuseria, G. E.; Robb, M. A.; Cheeseman, J. R.; Scalmani, G.; Barone, V.; Mennucci, B.; Petersson, G. A.; Nakatsuji, H.; Caricato, M.; Li, X.; Hratchian, H. P.; Izmaylov, A. F.; Bloino, J.; Zheng, G.; Sonnenberg, J. L.; Hada, M.; Ehara, M.; Toyota, K.; Fukuda, R.; Hasegawa, J.; Ishida, M.; Nakajima, T.; Honda, Y.; Kitao, O.; Nakai, H.; Vreven, T.; Montgomery, J. A.; Peralta, Jr., J. E.; Ogliaro, F.; Bearpark, M.; Heyd, J. J.; Brothers, E.; Kudin, K. N.; Staroverov, V. N.; Keith, T.; Kobayashi, R.; Normand, J.; Raghavachari, K.; Rendell, A.; Burant, J. C.; Iyengar, S. S.; Tomasi, J.; Cossi, M.; Rega,

N.; Millam, J. M.; Klene, M.; Knox, J. E.; Cross, J. B.; Bakken, V.; Adamo, C.; Jaramillo, J.; Gomperts, R.; Stratmann, R. E.; Yazyev, O.; Austin, A. J.; Cammi, R.; Pomelli, C.; Ochterski, J. W.; Martin, R. L.; Morokuma, K.; Zakrzewski, V. G.; Voth, G. A.; Salvador, P.; Dannenberg, J. J.; Dapprich, S.; Daniels, A. D.; Farkas, O.; Foresman, J. B.; Ortiz, J. V.; Cioslowski, J.; and Fox, D. J. Gaussian, Inc., Wallingford CT, **2013**.

[7] a) Becke, A. D. *J. Chem. Phys.* **1993**, *98*, 5648. b) Becke, A. D. *J. Chem. Phys.* **1993**, *98*, 1372. c) Stephens, P. J.; Devlin, F. J.; Chabalowski, C. F.; Frisch, M. J. *J. Phys. Chem.* **1994**, *98*, 11623. d) Lee, C.; Yang, W.; Parr, R. G. *Phys. Rev. A* **1988**, *37*, 785.

[8] a) Dolg, M.; Wedig, U.; Stoll, H.; Preuss, H. *J. Chem. Phys.* **1987**, *86*, 866. b) Nicklass, A.; Dolg, M.; Stoll, H.; Preuss, H. *J. Chem. Phys.* **1995**, *102*, 8942.

[9] a) Ditchfield, R.; Hehre, W. J.; Pople, J. A. *J. Chem. Phys.* **1971**, *54*, 724. b) Hehre, W. J.; Ditchfield, R.; Pople, J. A. *J. Chem. Phys.* **1972**, *56*, 2257. c) Hariharan, P. C.; Pople, J. A. *Theor. Chem. Acc.* **1973**, *28*, 213.

[10] Zhao, Y.; Truhlar, D. G. *Theor. Chem. Acc.* **2008**, *120*, 215.

[11] a) Clark, T.; Chandrasekhar, J.; Spitznagel, G. W.; Schleyer, P. Von R. *J. Comput. Chem.* **1983**, *4*, 294. b) Krishnan, R.; Binkley, J. S.; Seeger, R.; Pople, J. A. *J. Chem. Phys.* **1980**, *72*, 650.

[12] Marenich, A. V.; Cramer, C. J.; Truhlar, D. G. *J. Phys. Chem. B.* **2009**, *113*, 6378.

[13] Legault, C. Y. CYL View, version 1.0 b; Universite de Sherbrooke, Sherbrooke, Quebec, Canada, **2009**; <http://www.cylview.org>.

## 9. Copies of NMR Spectra

### <sup>1</sup>H NMR Spectrum of 3a

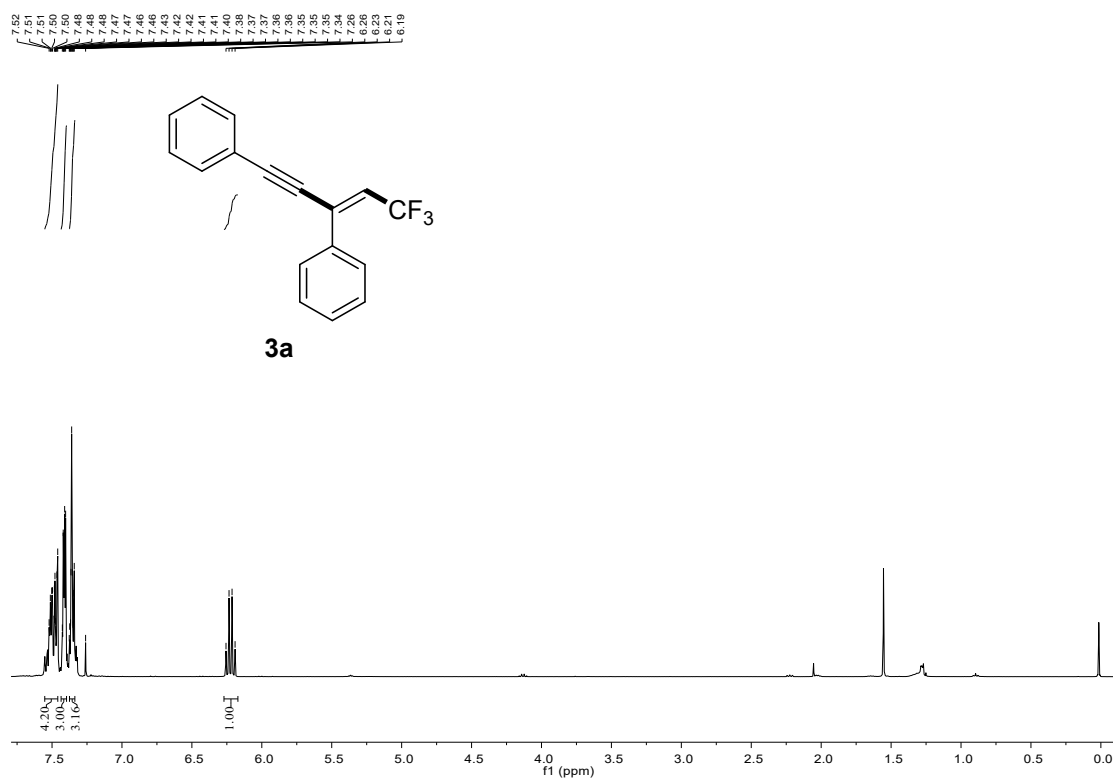

### <sup>13</sup>C NMR Spectrum of 3a

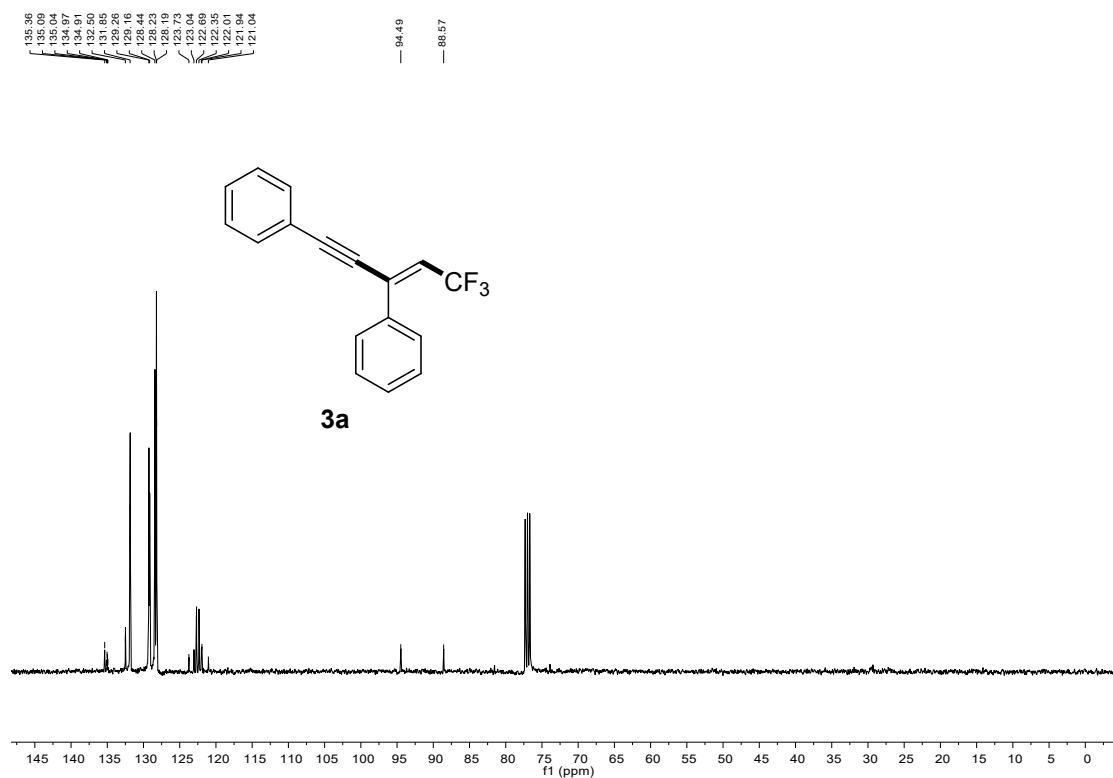

### <sup>19</sup>F NMR Spectrum of 3a

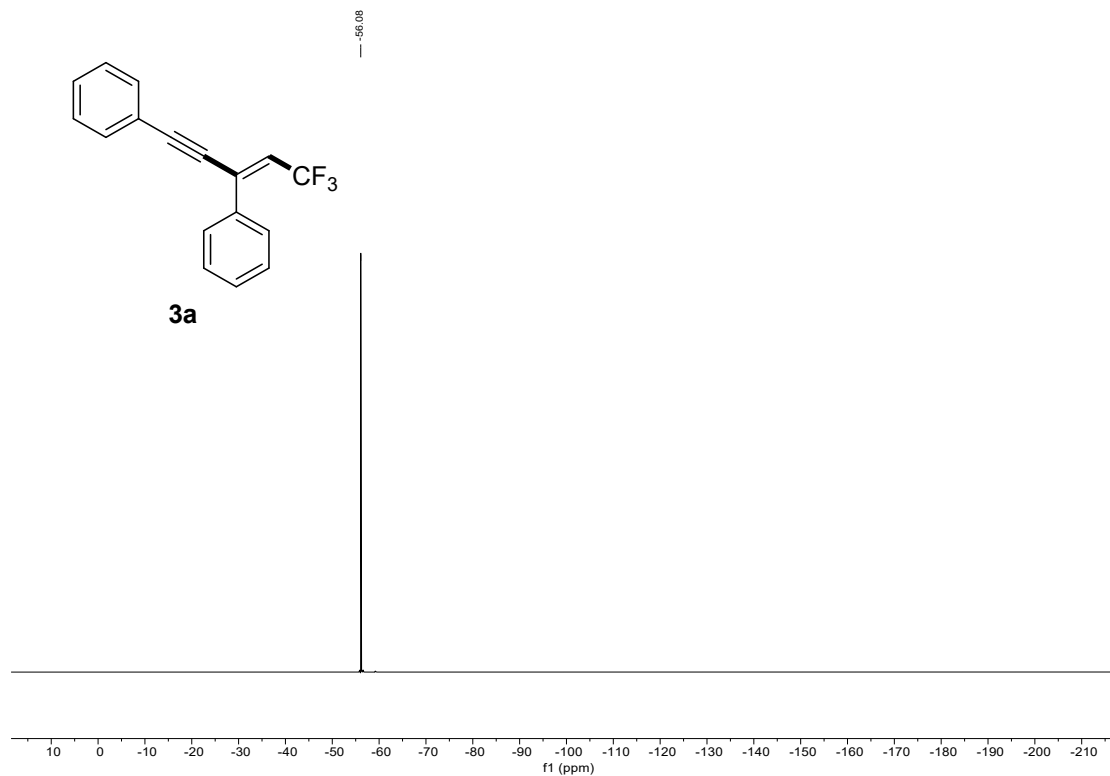

### <sup>1</sup>H NMR Spectrum of 3b

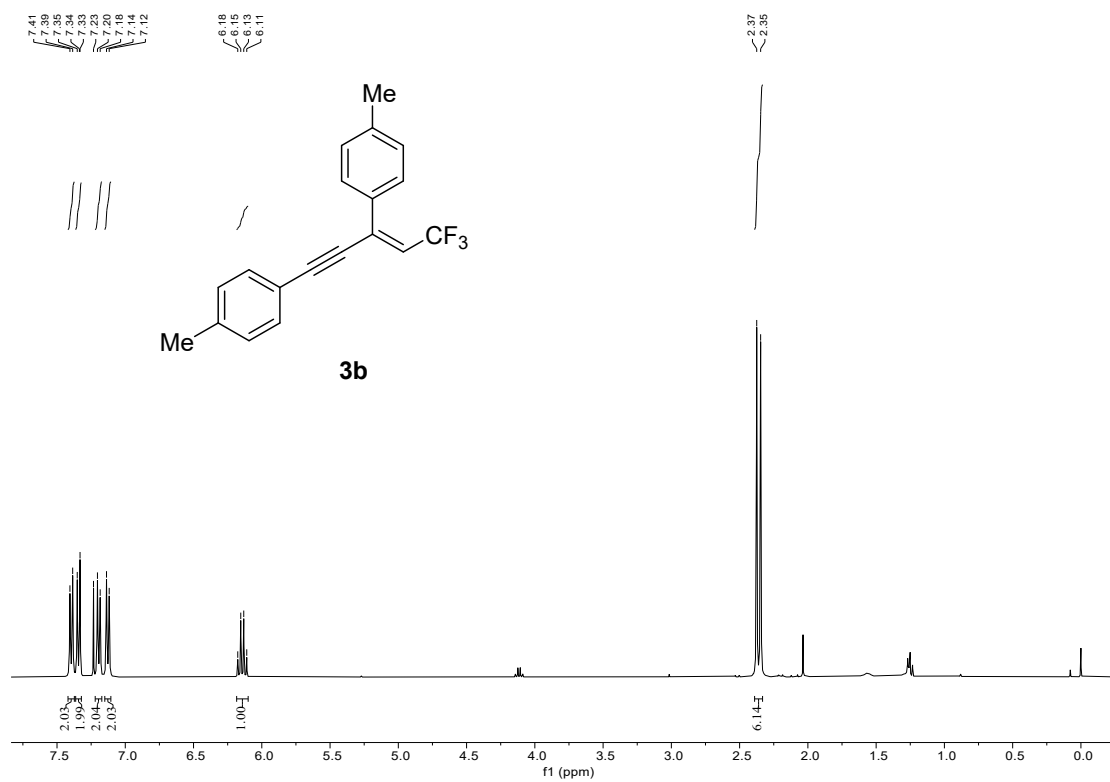



### <sup>13</sup>C NMR Spectrum of 3b

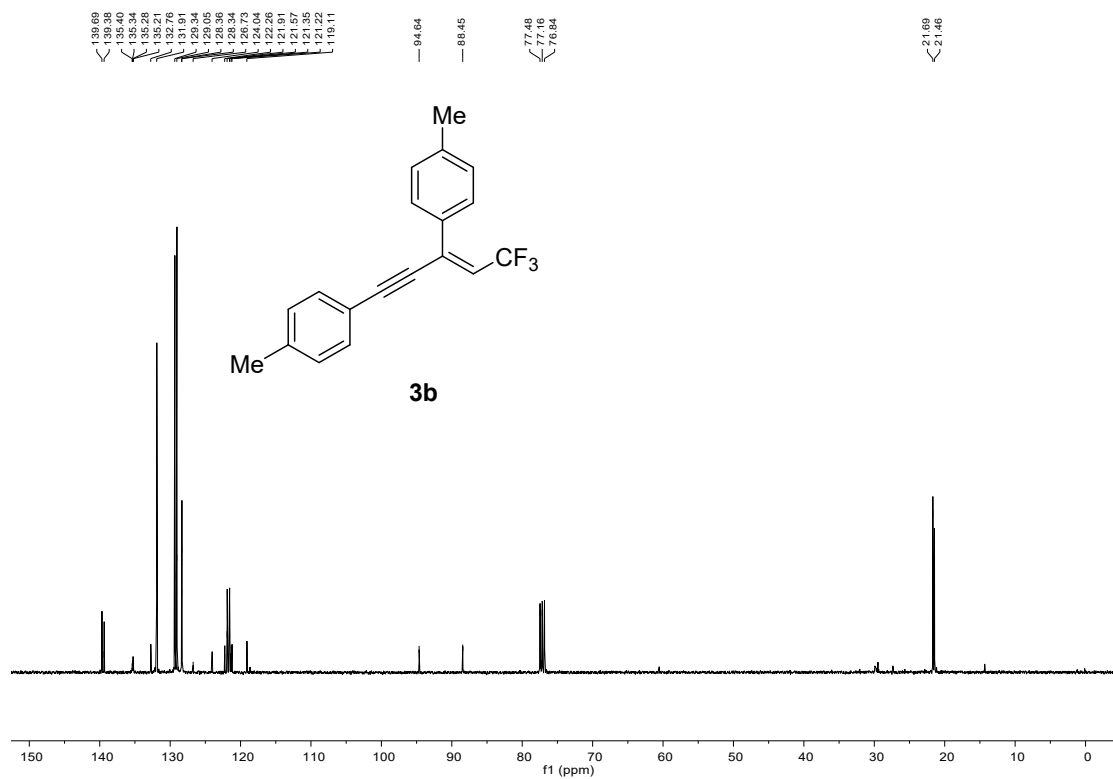

### <sup>19</sup>F NMR Spectrum of 3b

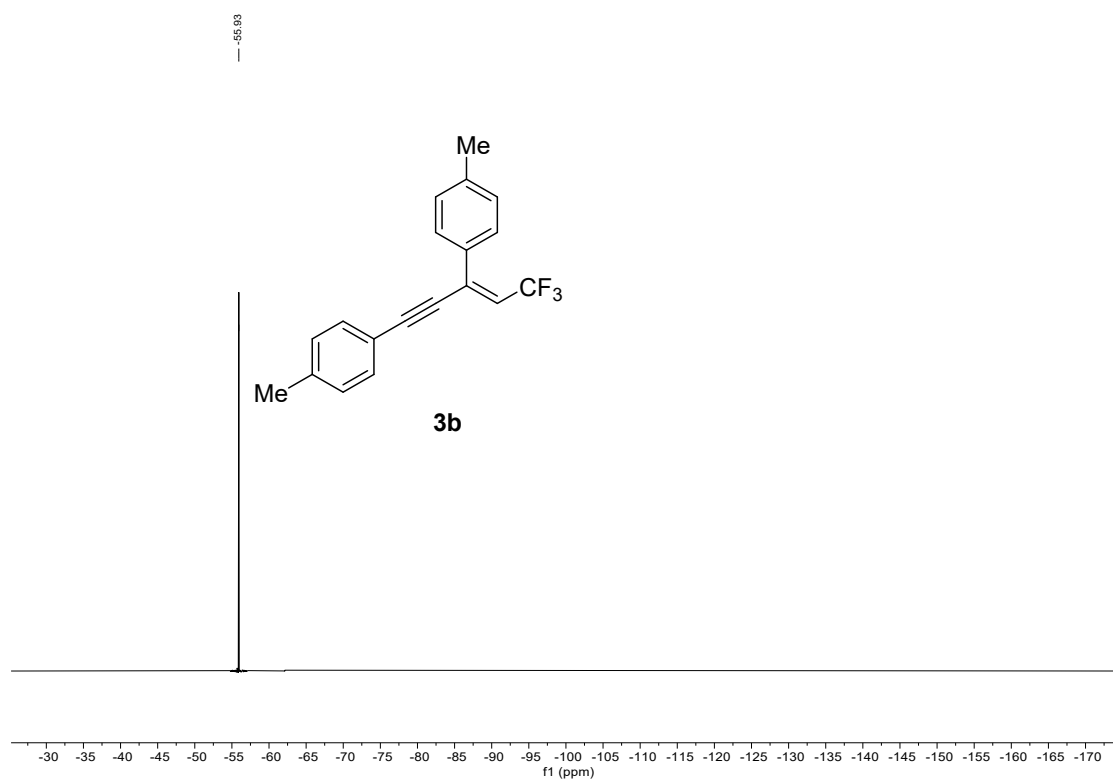

### <sup>1</sup>H NMR Spectrum of 3c

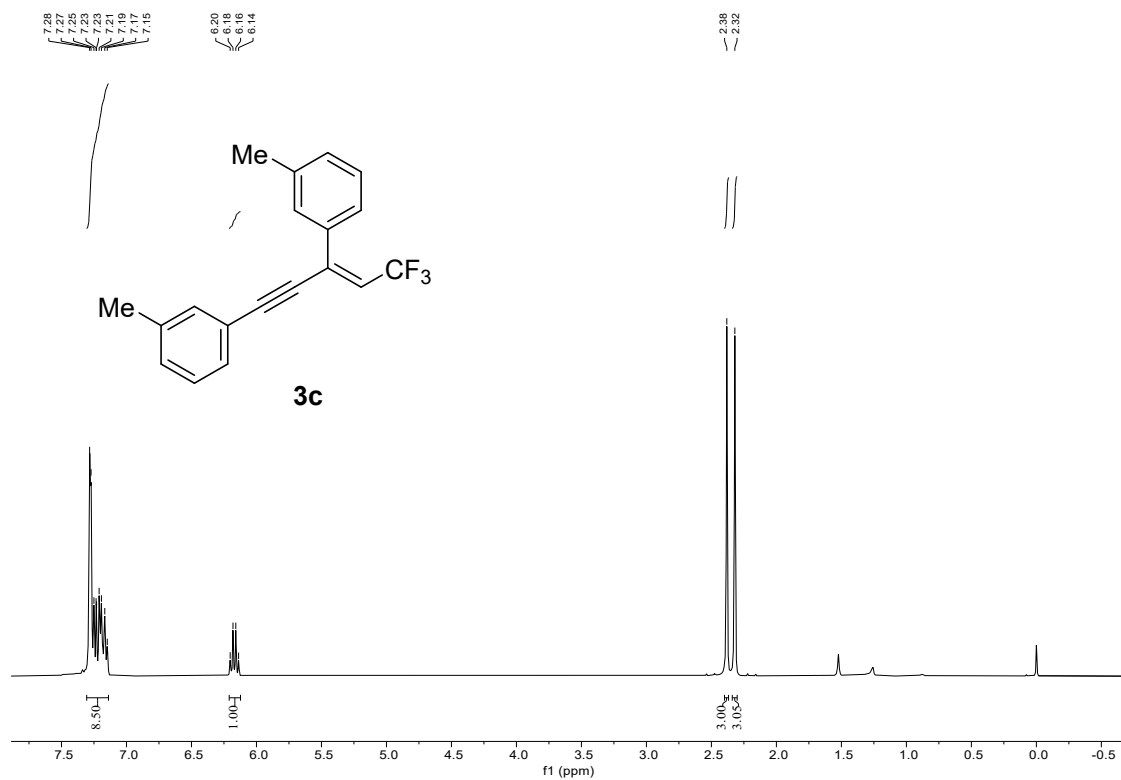

### <sup>13</sup>C NMR Spectrum of 3c

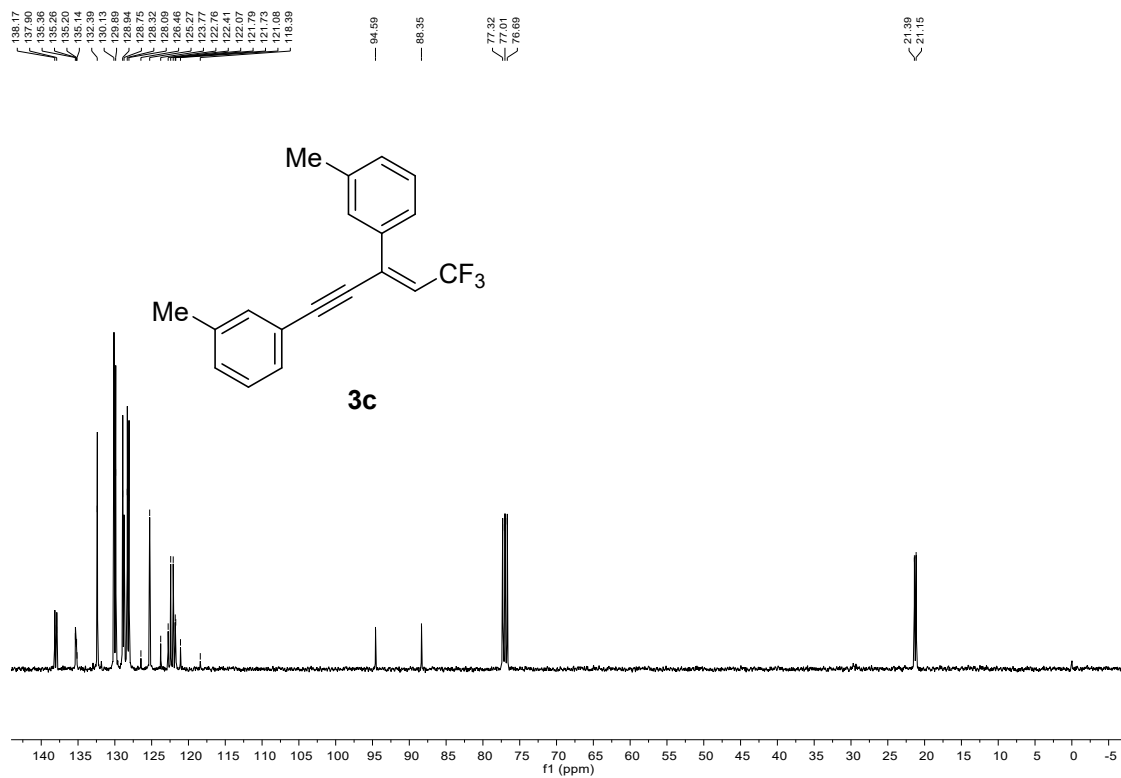

**<sup>19</sup>F NMR Spectrum of 3c**

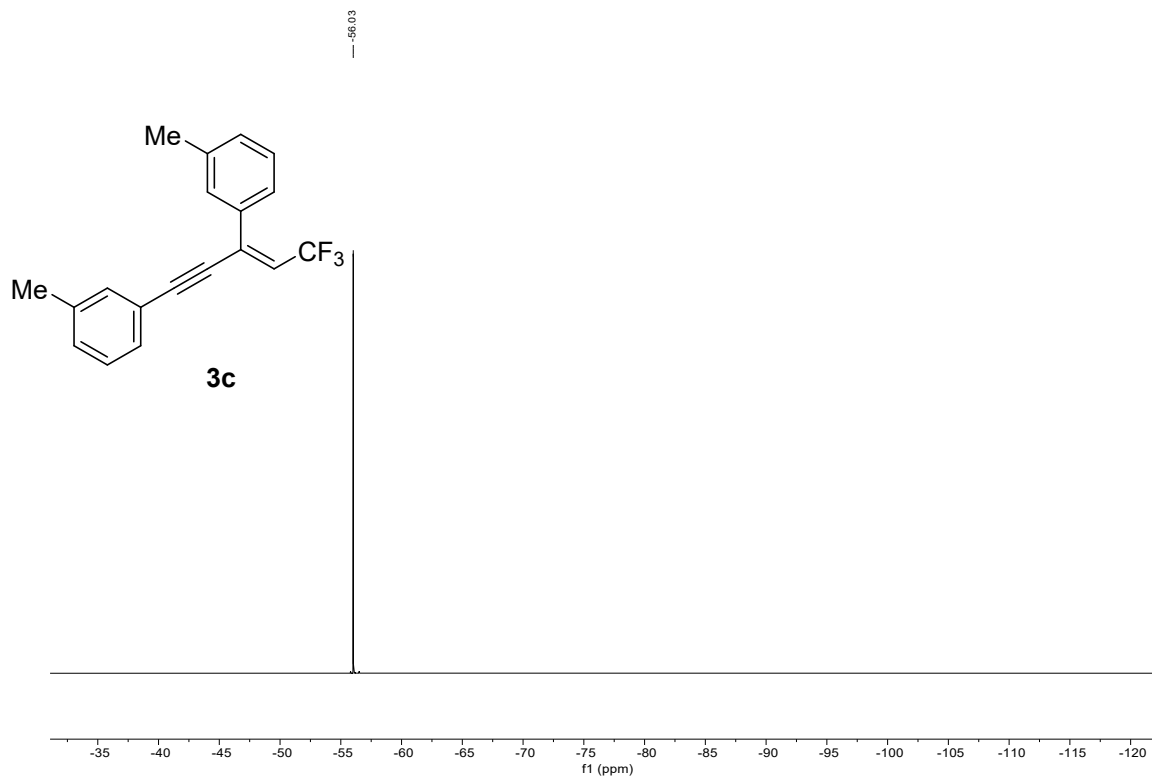

### <sup>1</sup>H NMR Spectrum of 3d

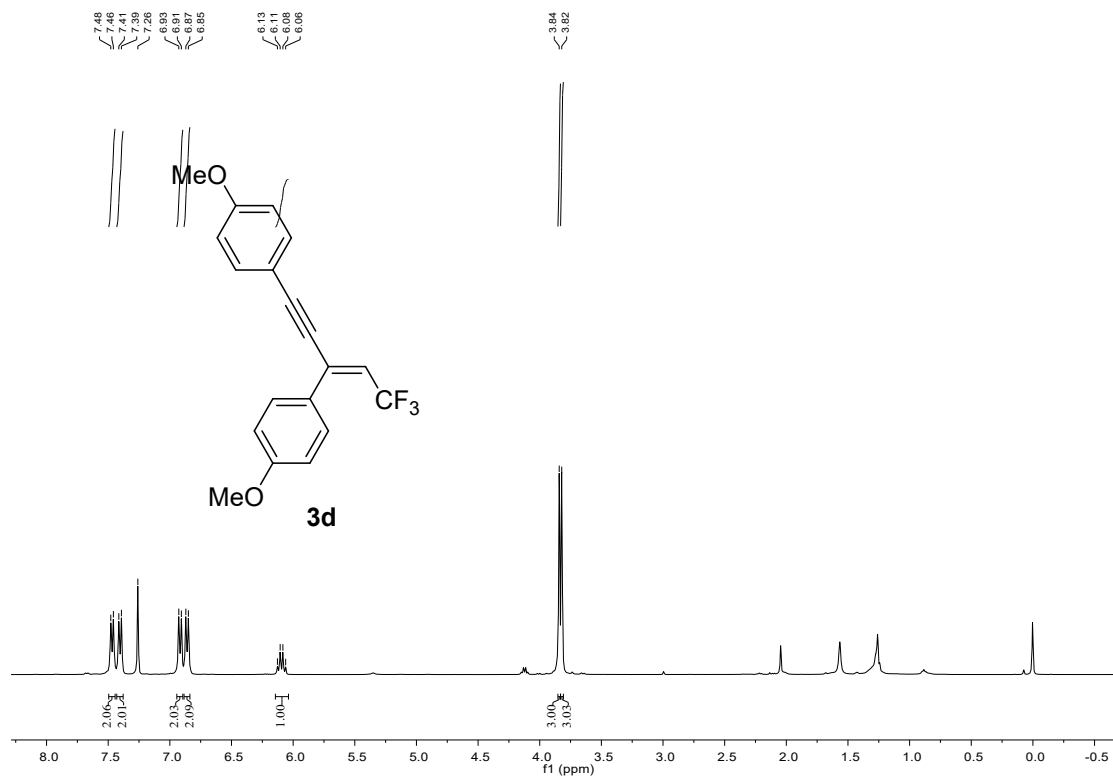

### <sup>13</sup>C NMR Spectrum of 3d

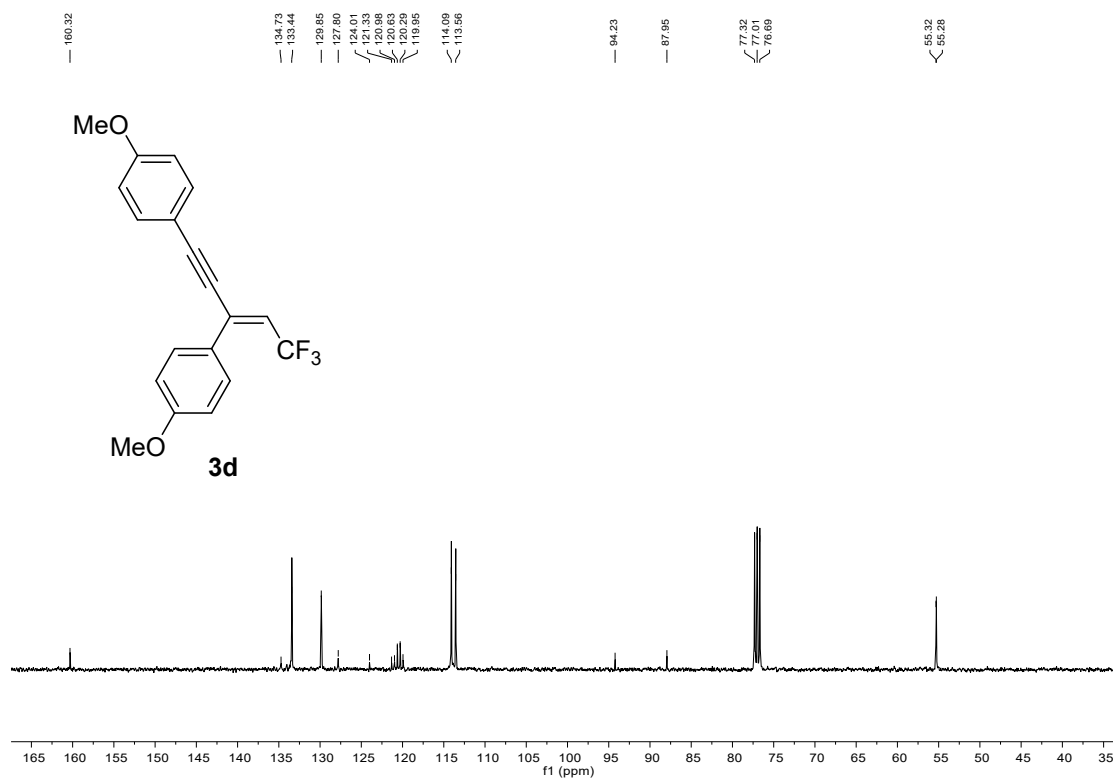

**<sup>19</sup>F NMR Spectrum of 3d**

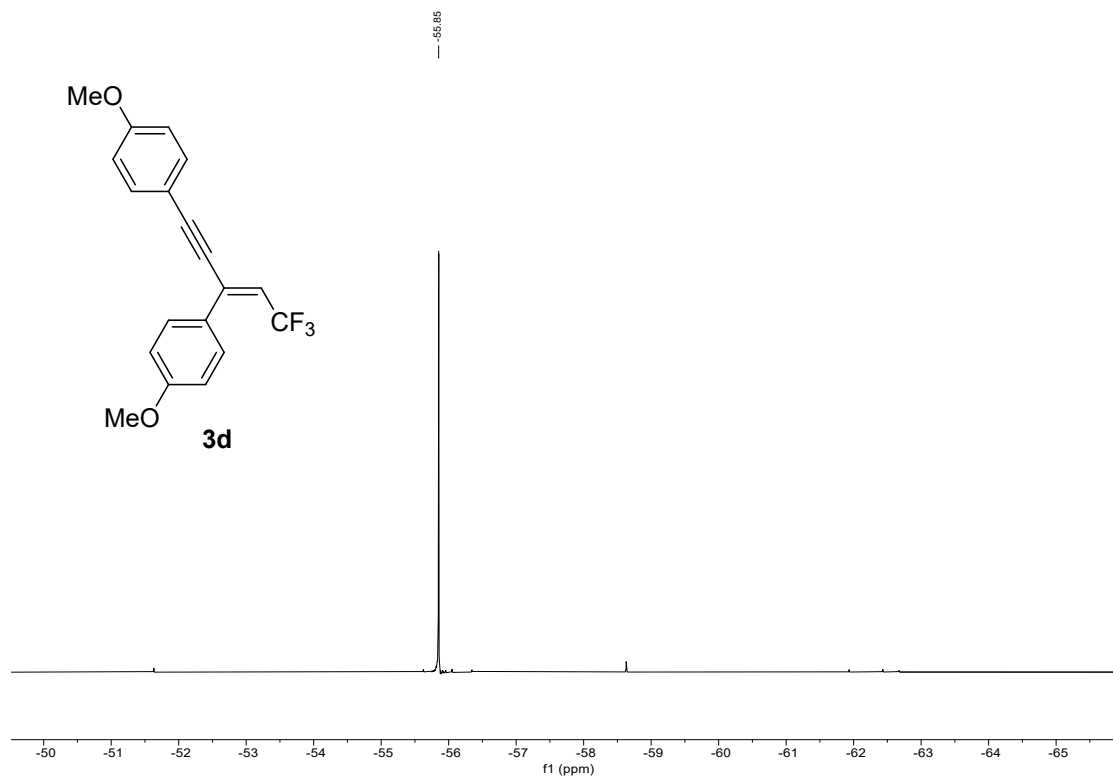

### <sup>1</sup>H NMR Spectrum of 3e

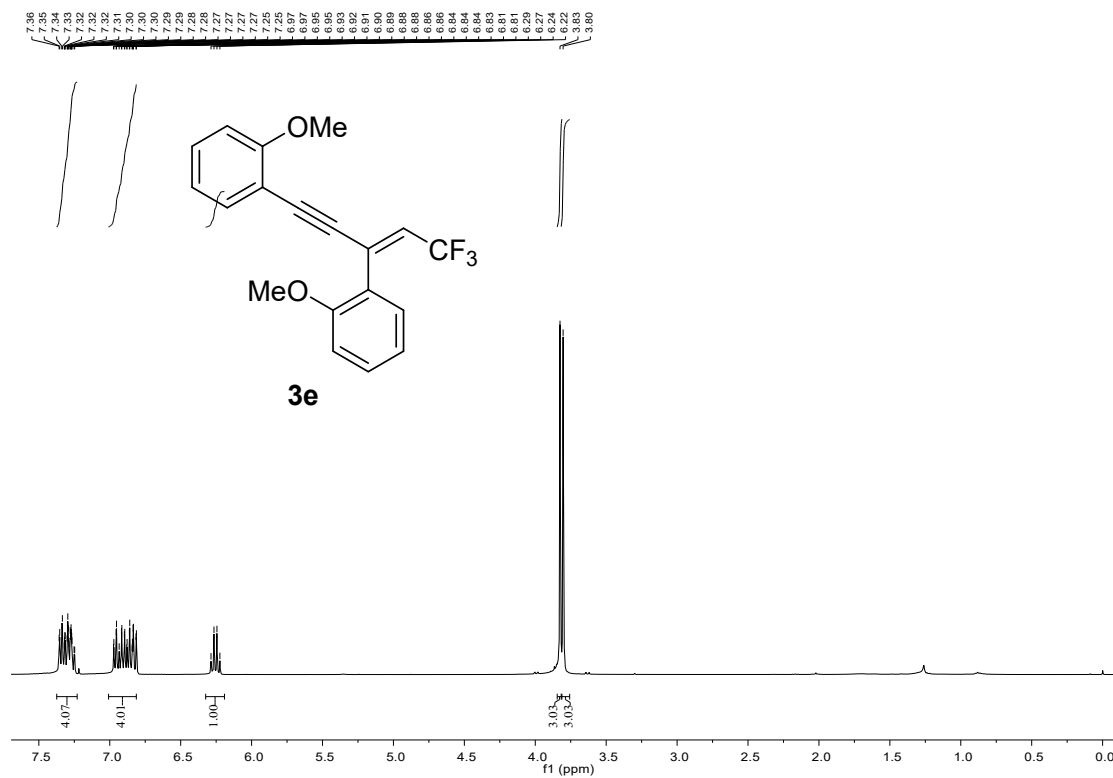

### <sup>13</sup>C NMR Spectrum of 3e

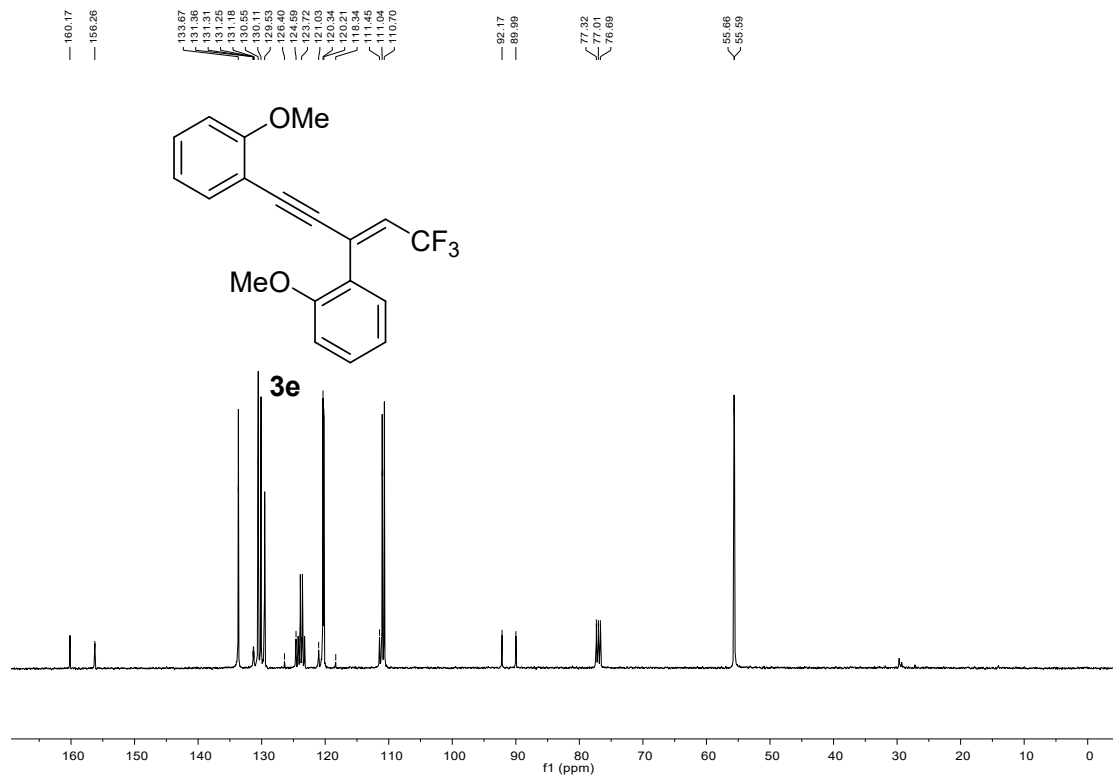

### <sup>19</sup>F NMR Spectrum of 3e

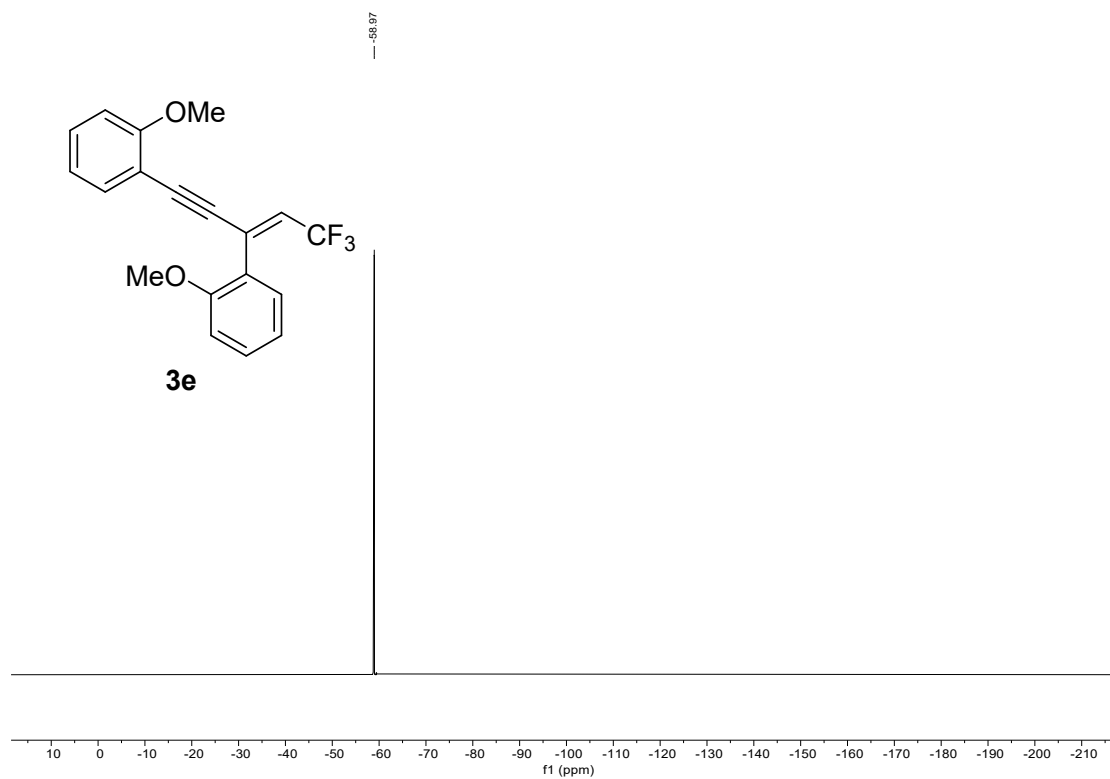

### <sup>1</sup>H NMR Spectrum of 3f

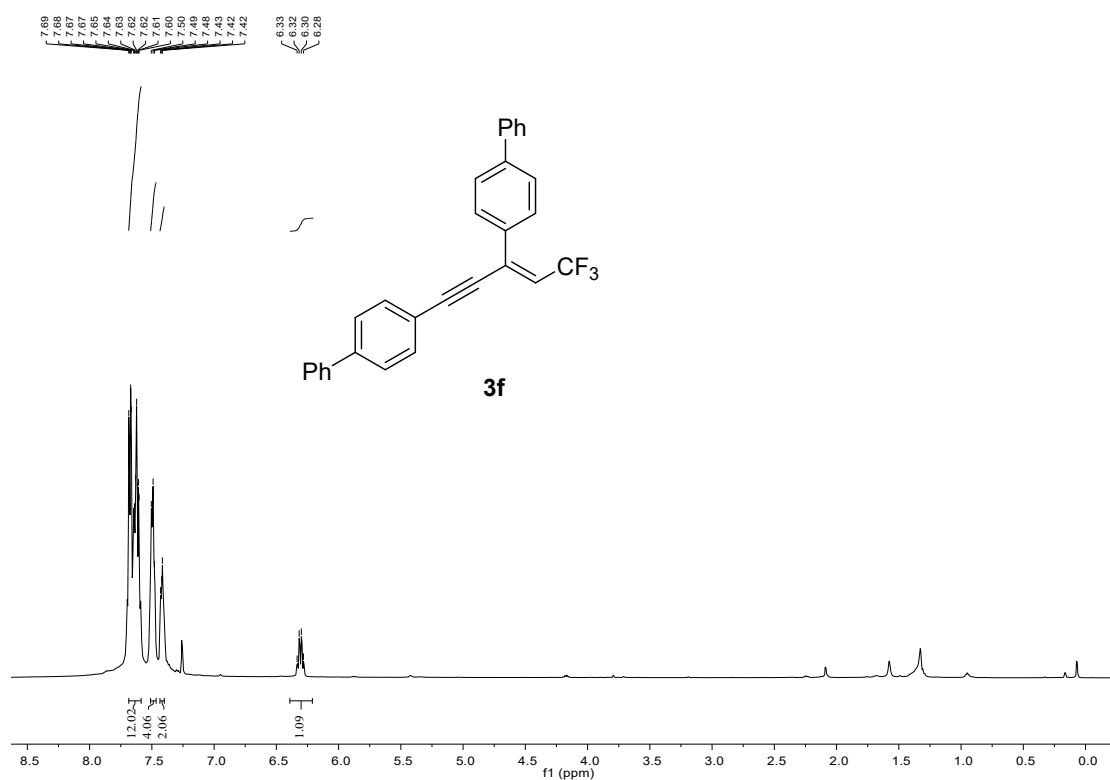

### <sup>13</sup>C NMR Spectrum of 3f

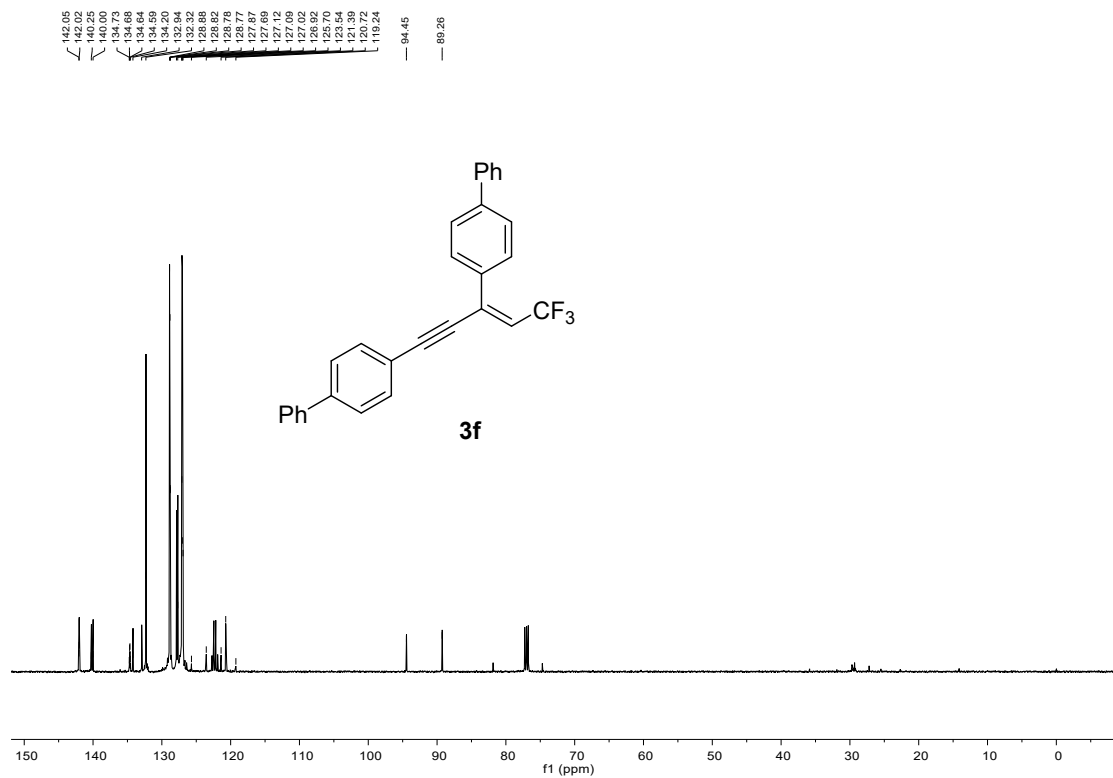

### <sup>19</sup>F NMR Spectrum of 3f



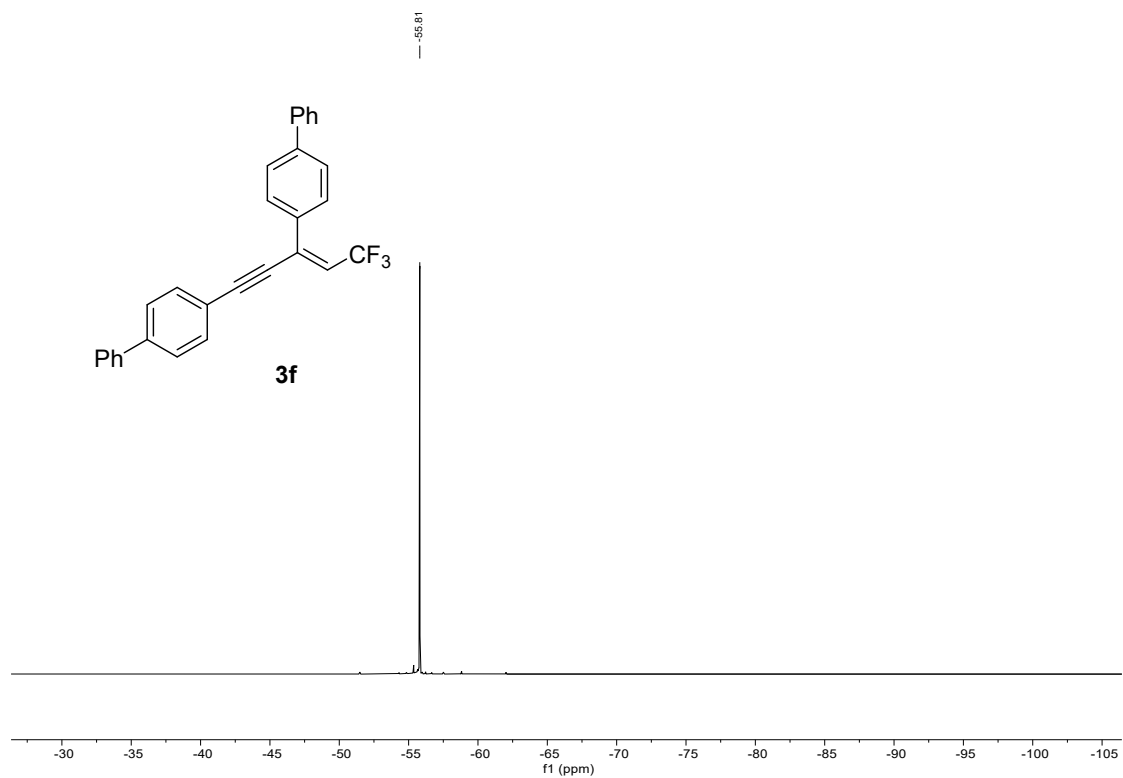

### <sup>1</sup>H NMR Spectrum of 3g

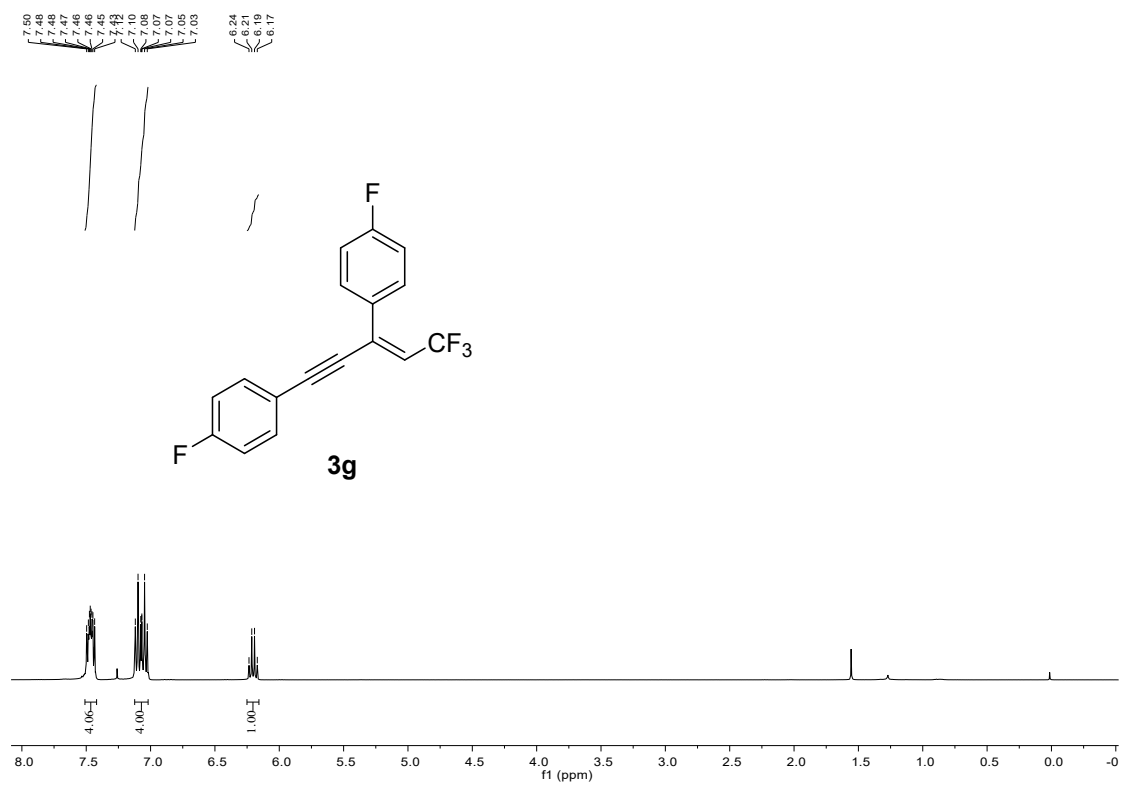

### <sup>13</sup>C NMR Spectrum of 3g

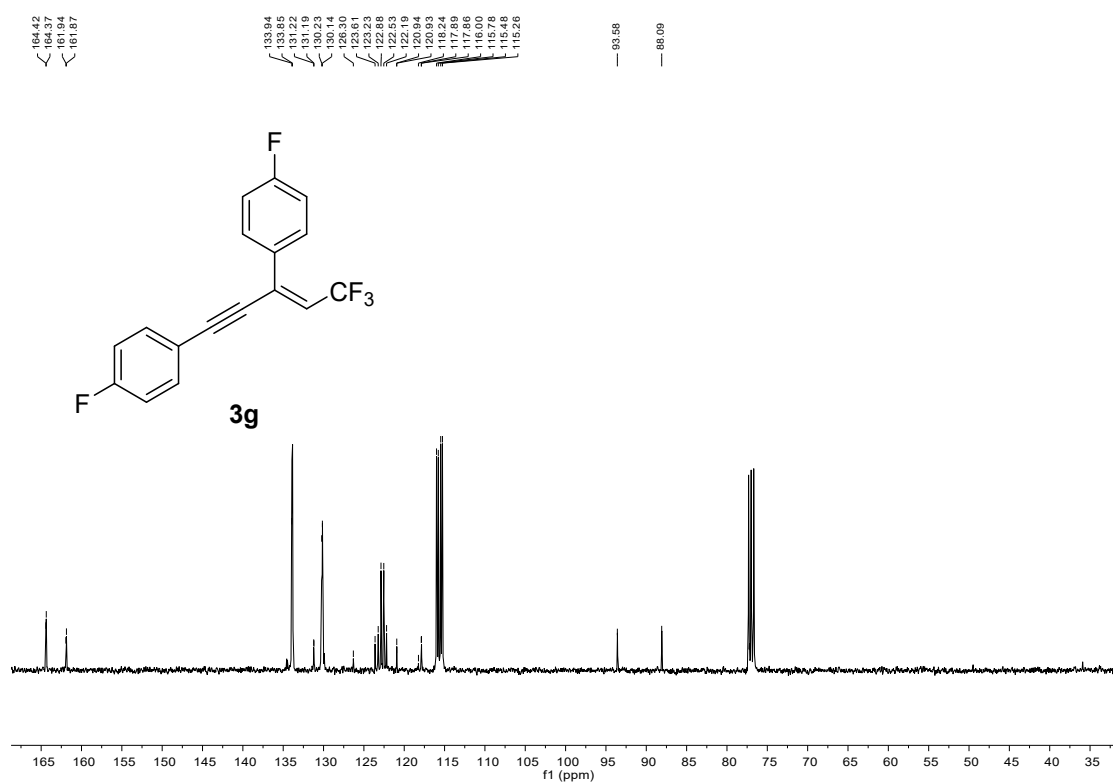

### <sup>19</sup>F NMR Spectrum of 3g

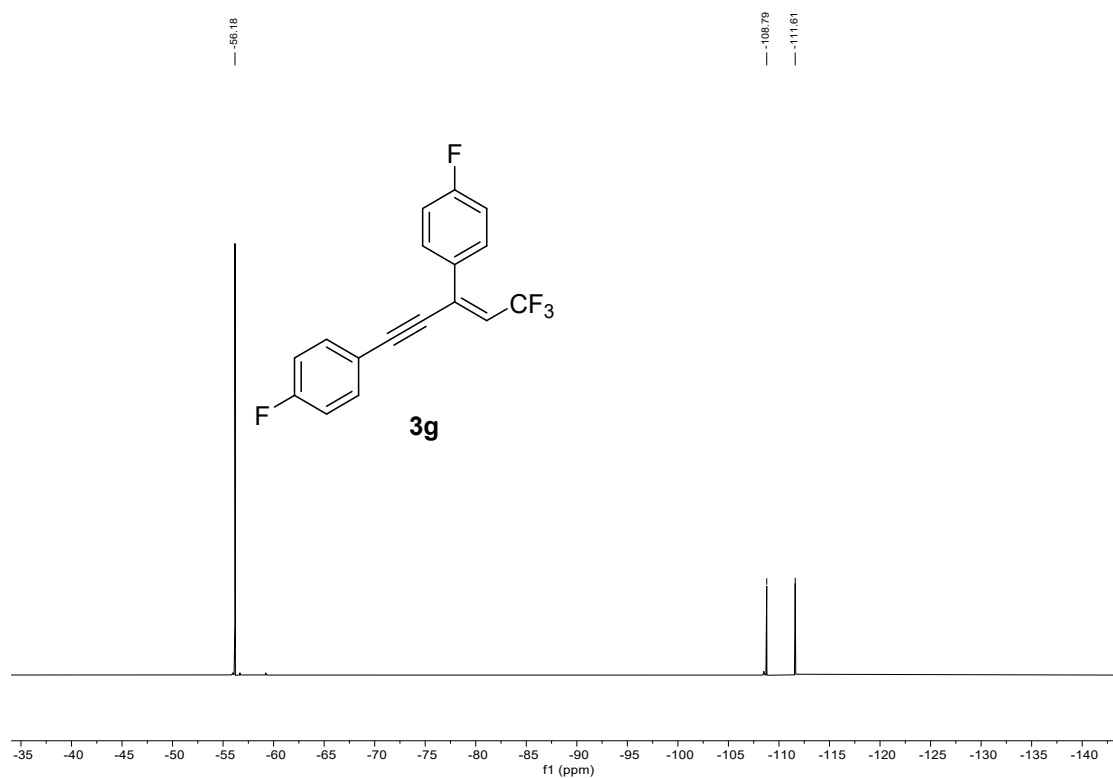

### <sup>1</sup>H NMR Spectrum of 3h

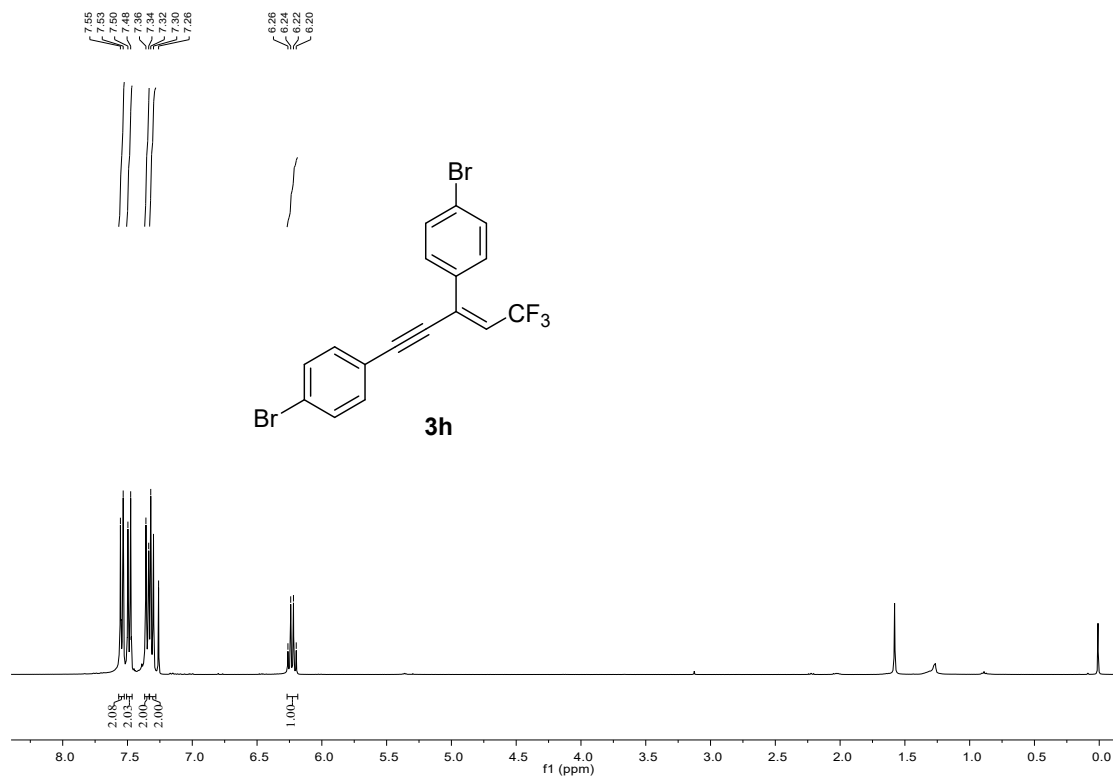

### <sup>13</sup>C NMR Spectrum of 3h

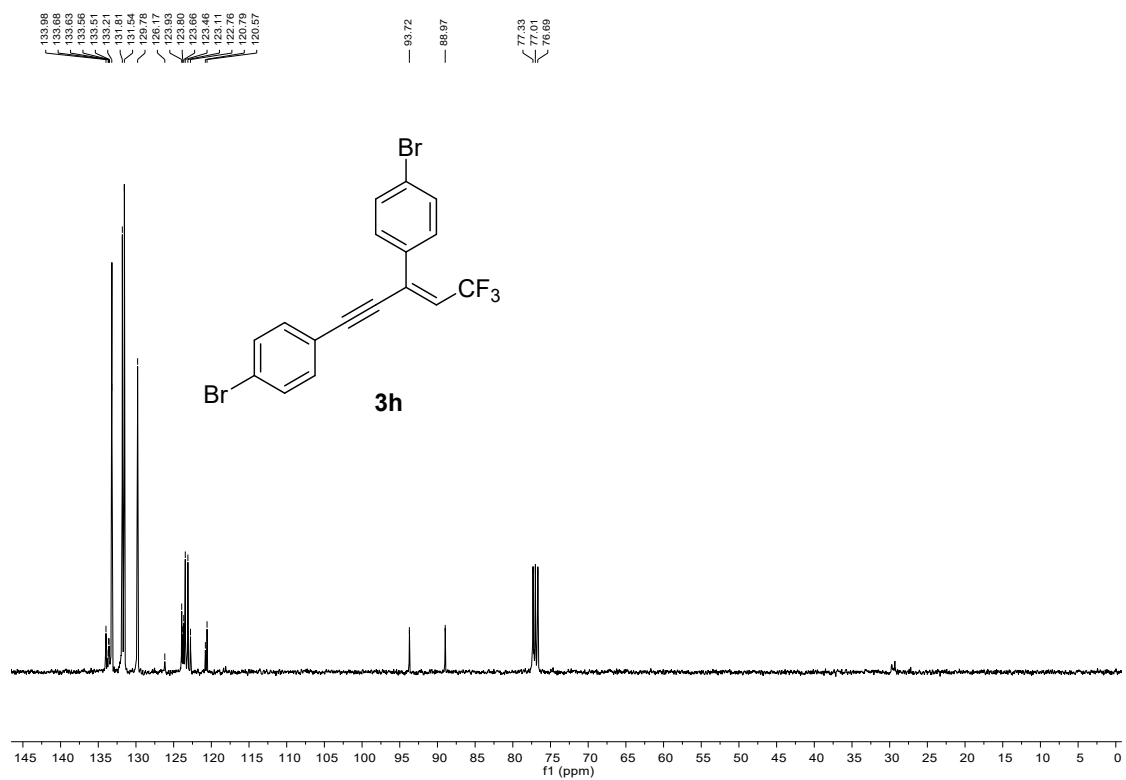

### <sup>19</sup>F NMR Spectrum of 3h

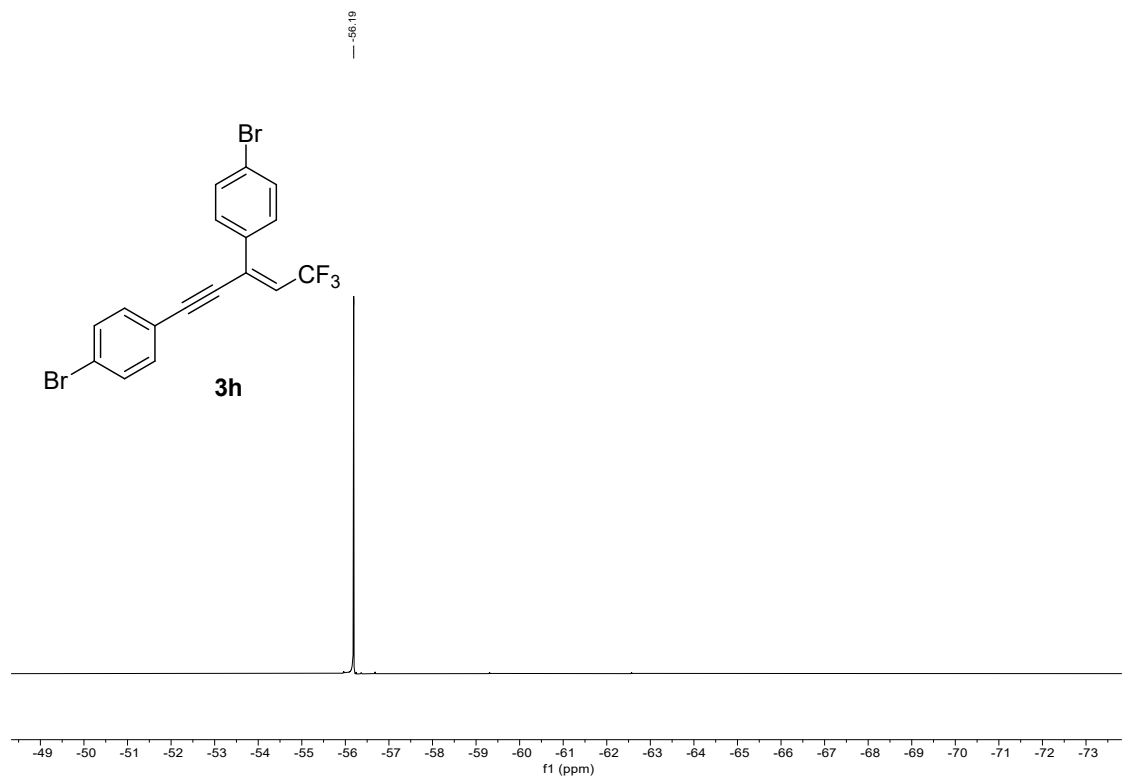

### <sup>1</sup>H NMR Spectrum of 3i

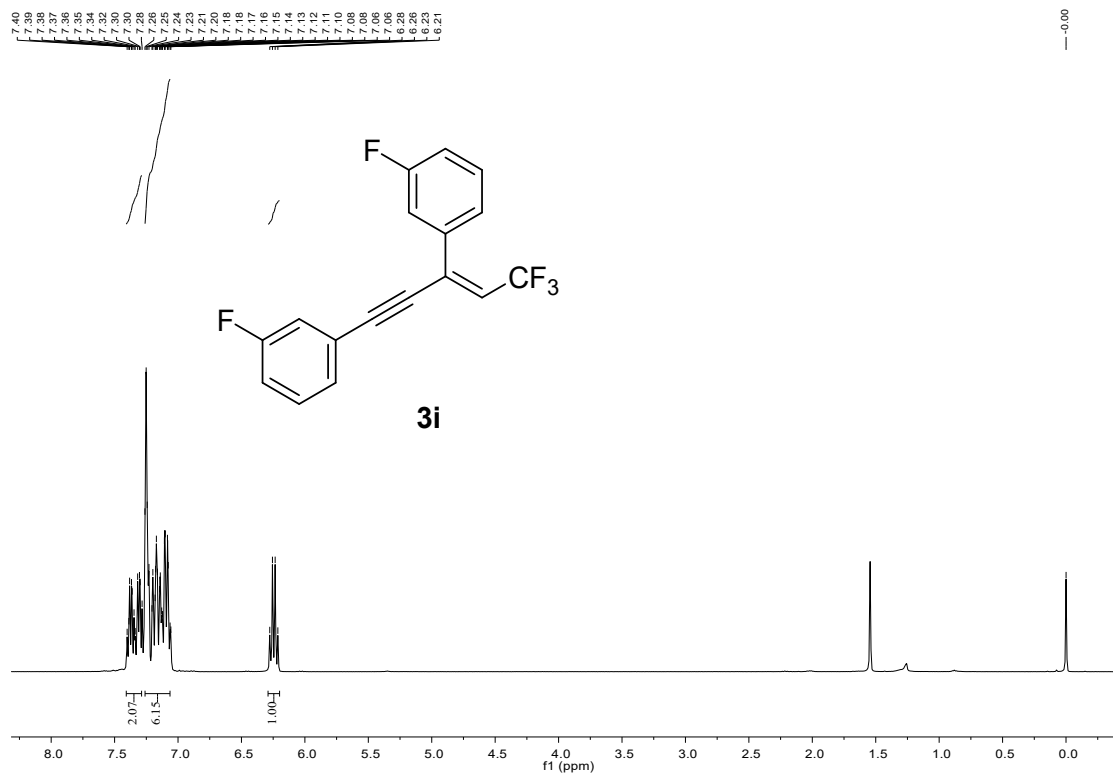

### <sup>13</sup>C NMR Spectrum of 3i

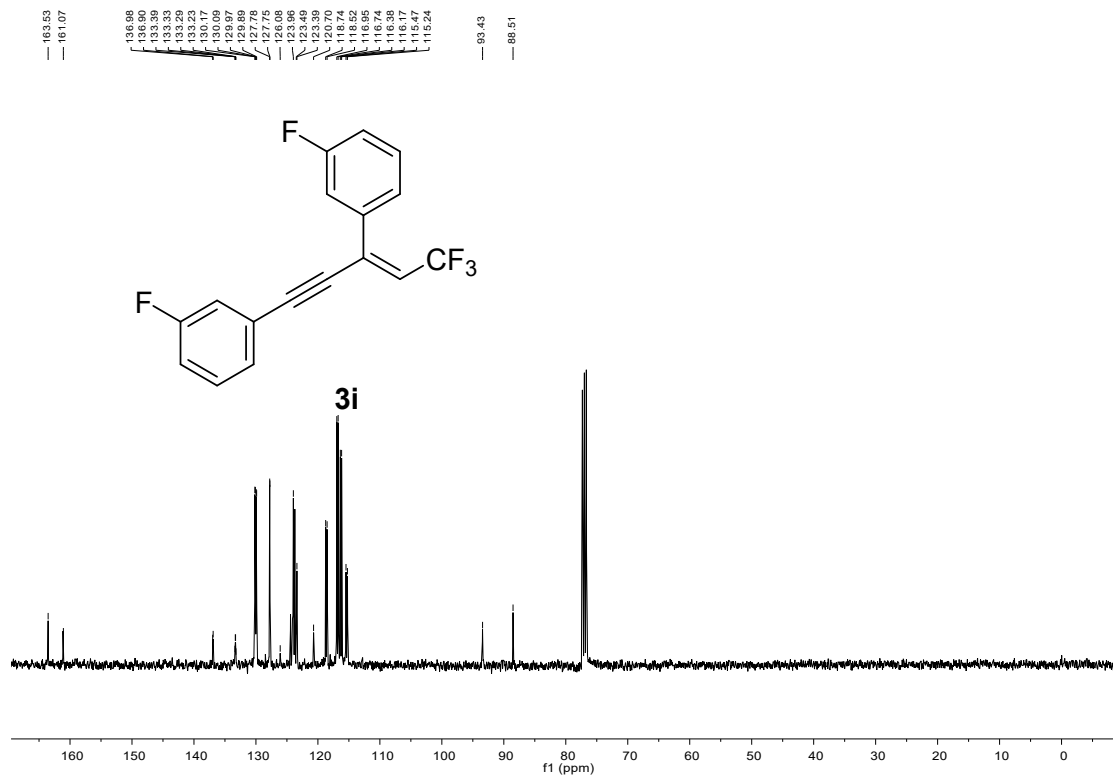

### <sup>19</sup>F NMR Spectrum of 3i

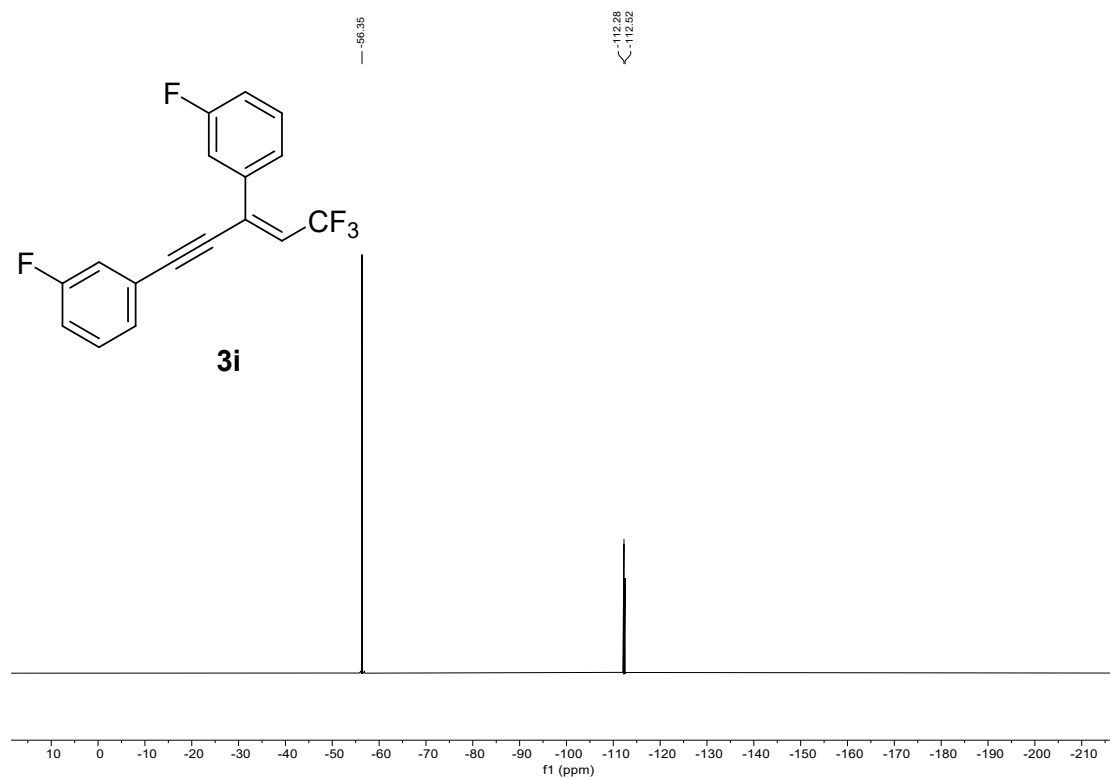

### <sup>1</sup>H NMR Spectrum of 3j

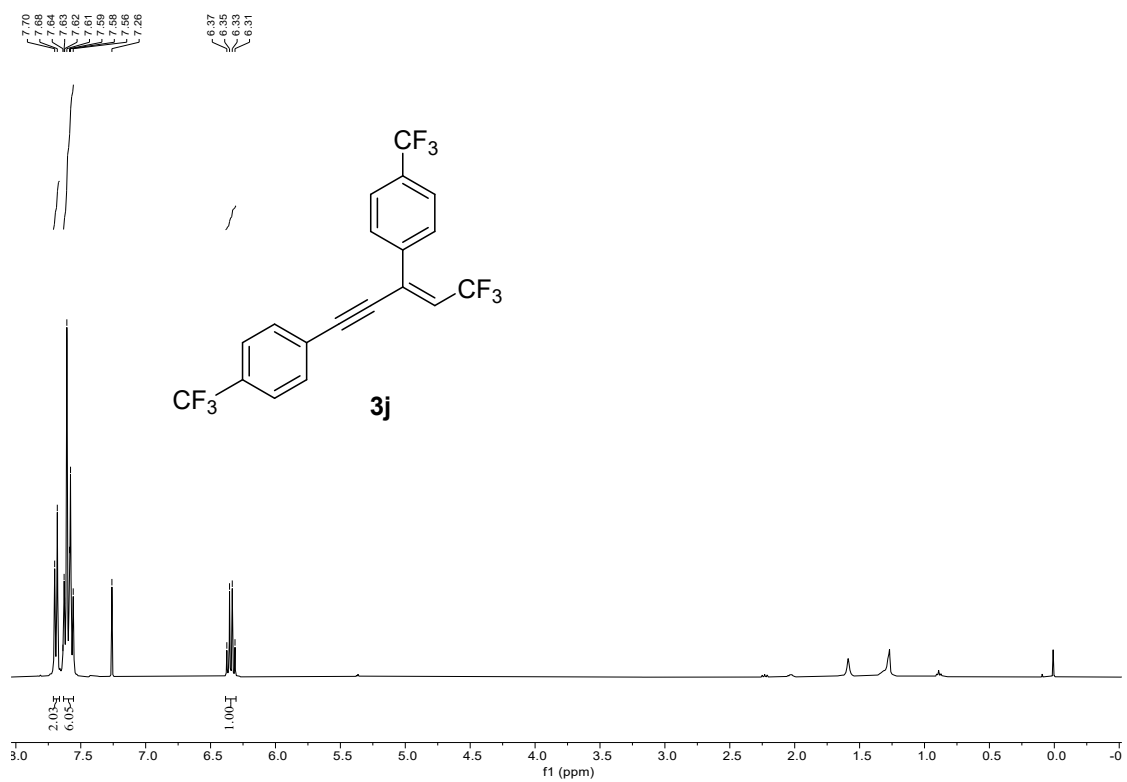

### <sup>13</sup>C NMR Spectrum of 3j

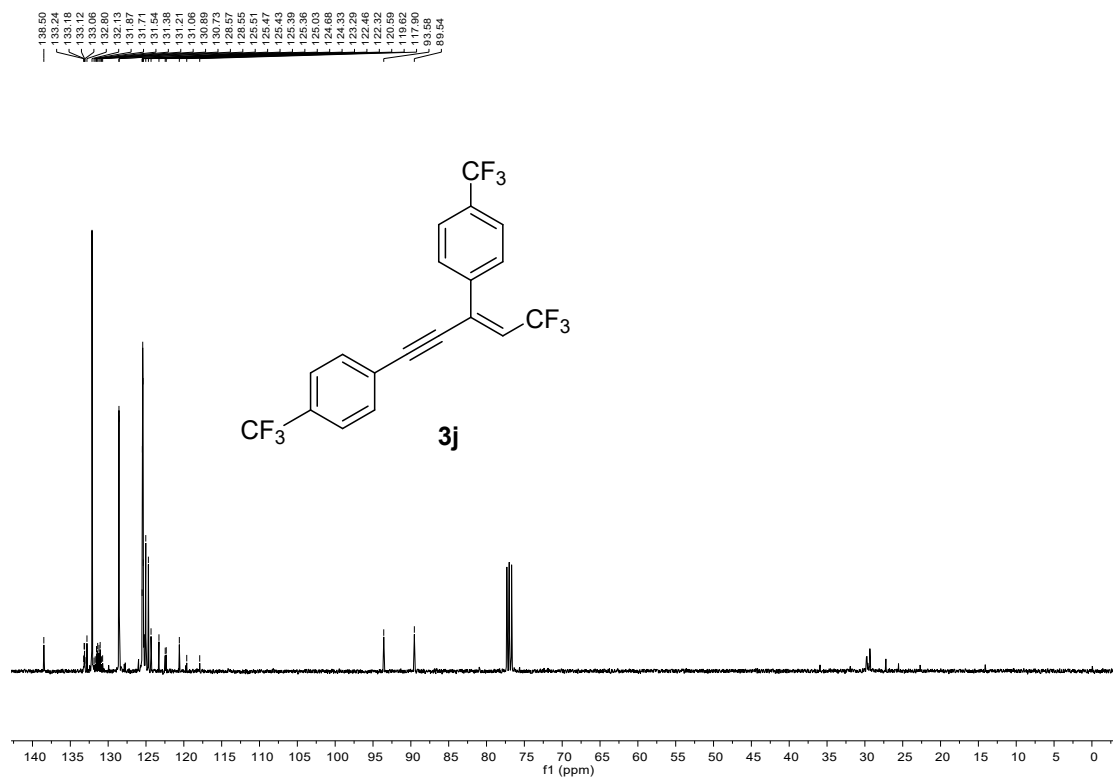

### <sup>19</sup>F NMR Spectrum of 3j

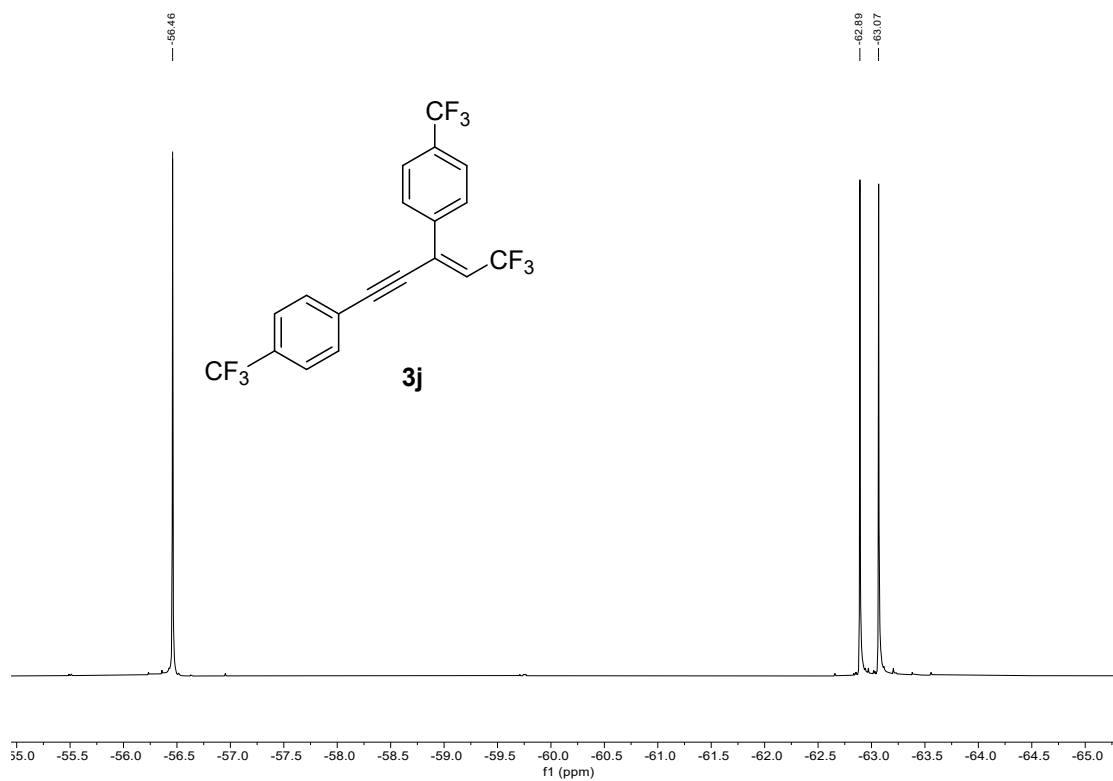

### <sup>1</sup>H NMR Spectrum of 3k

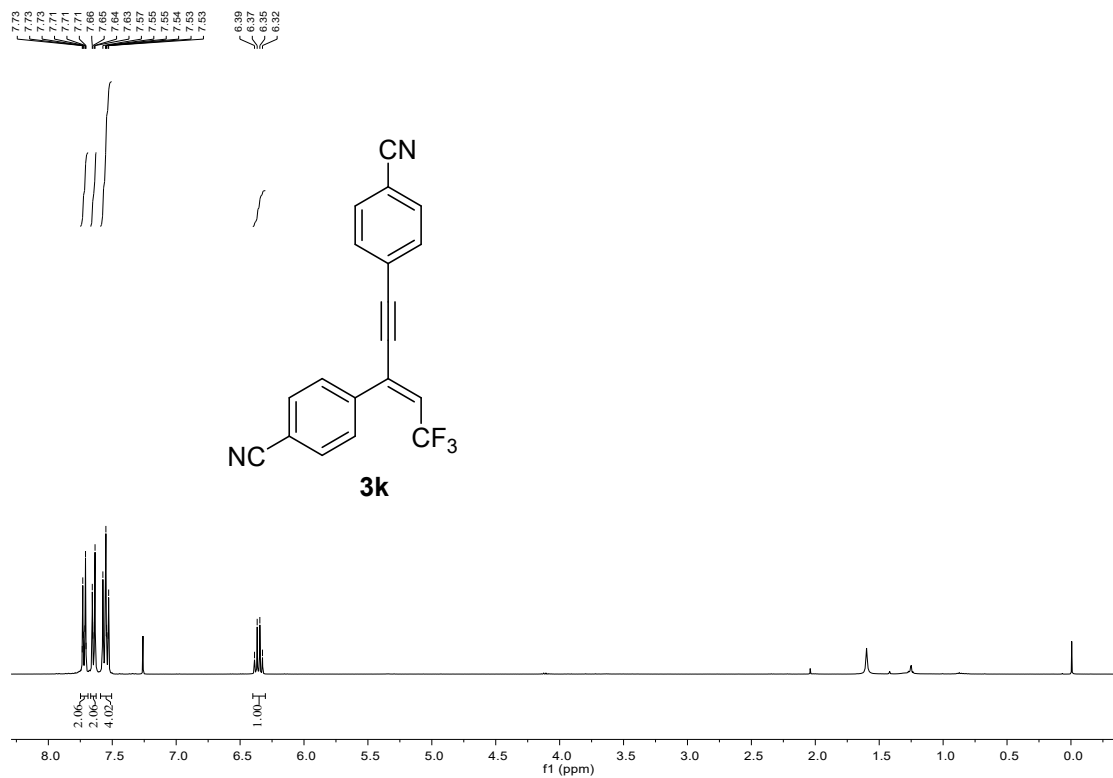

### <sup>13</sup>C NMR Spectrum of 3k

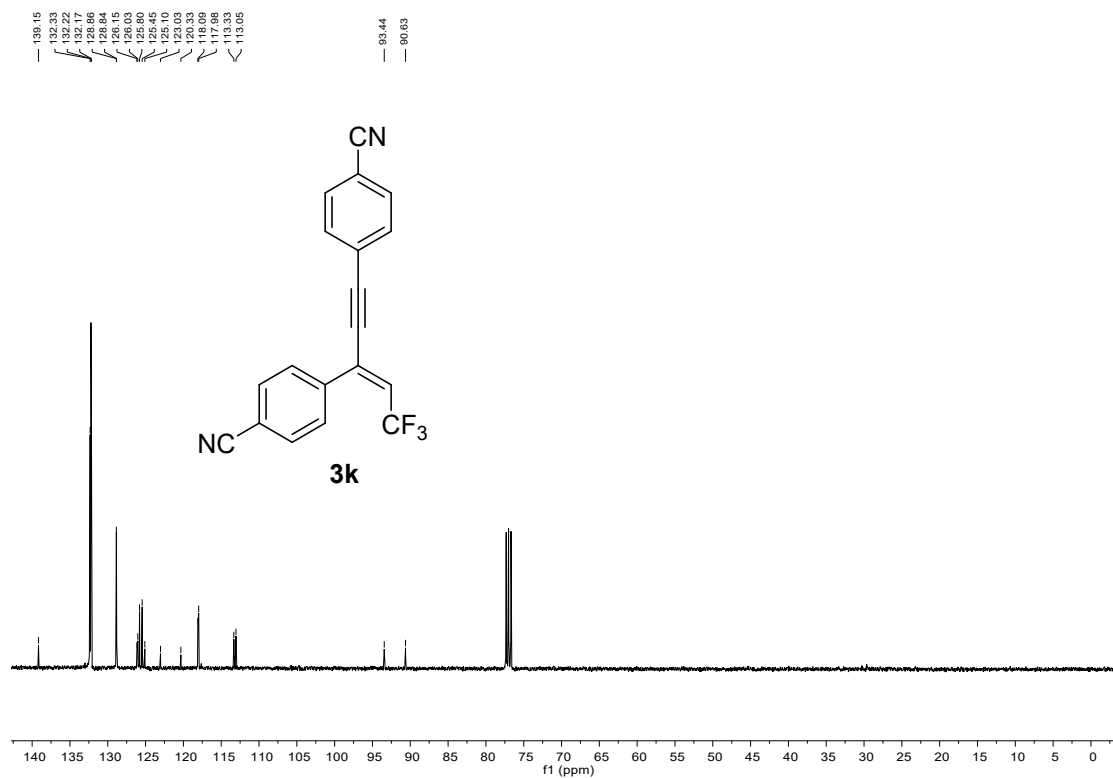



**<sup>19</sup>F NMR Spectrum of 3k**

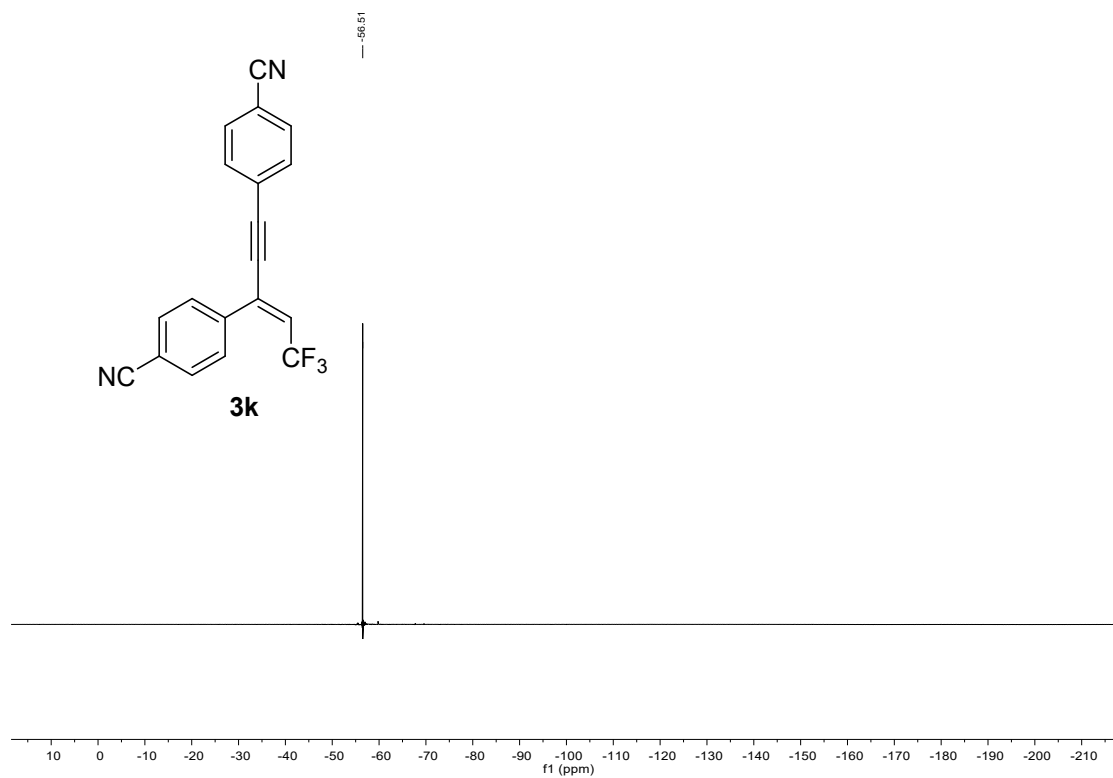

**<sup>1</sup>H NMR Spectrum of 3l**

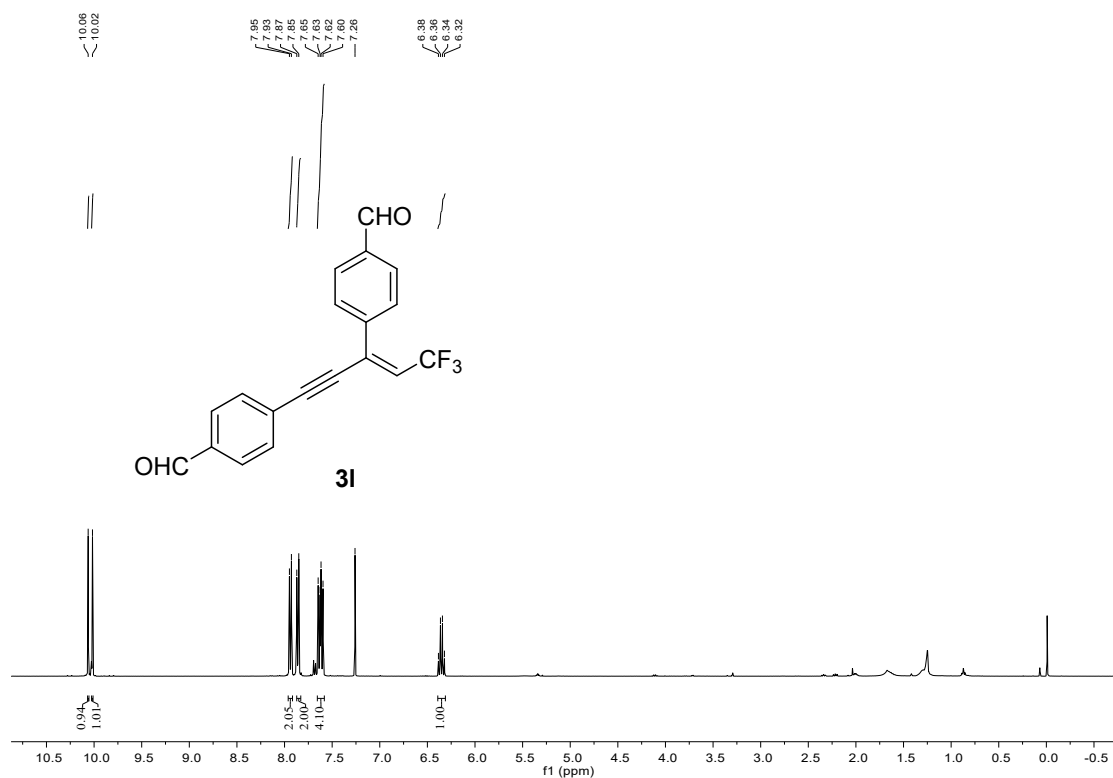

**<sup>13</sup>C NMR Spectrum of 3I**

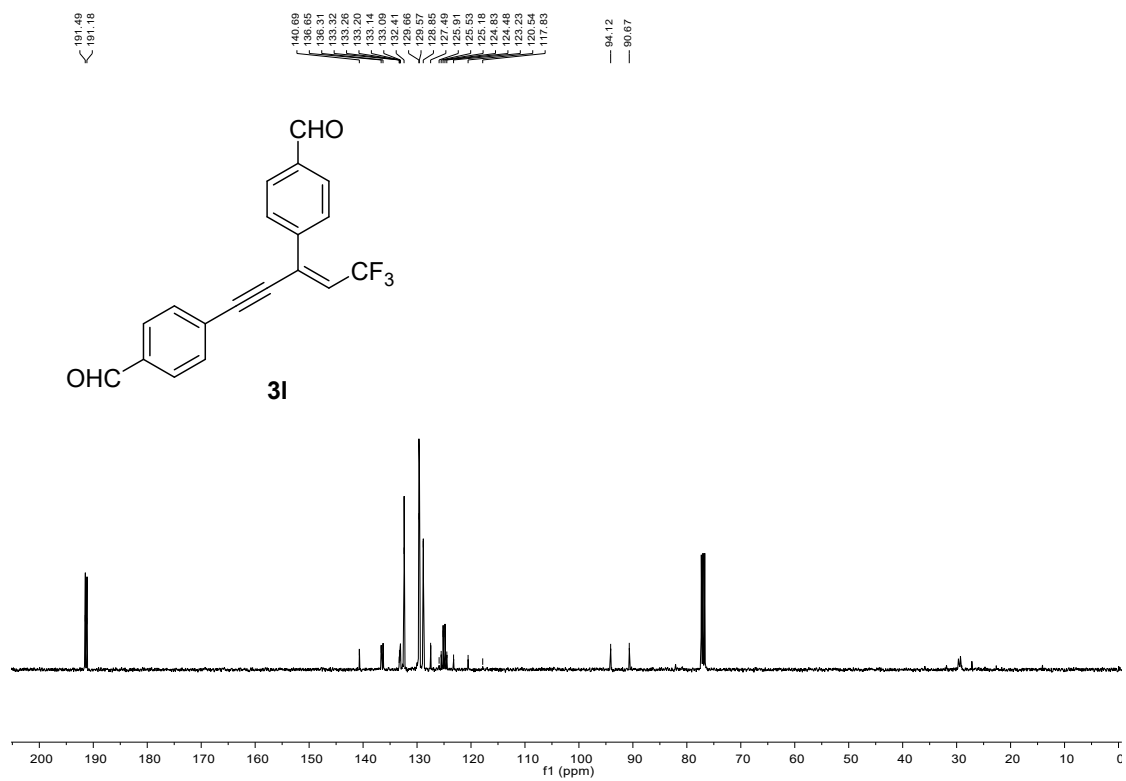

### <sup>19</sup>F NMR Spectrum of 3l

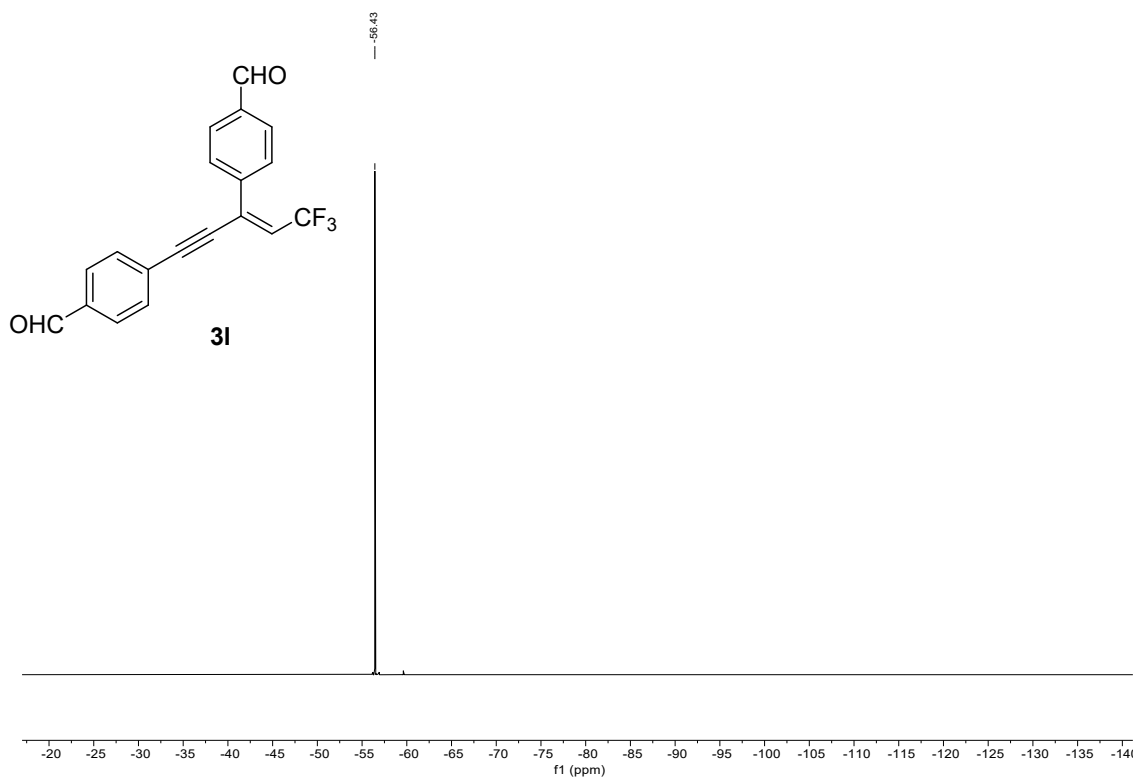

### <sup>1</sup>H NMR Spectrum of 3m

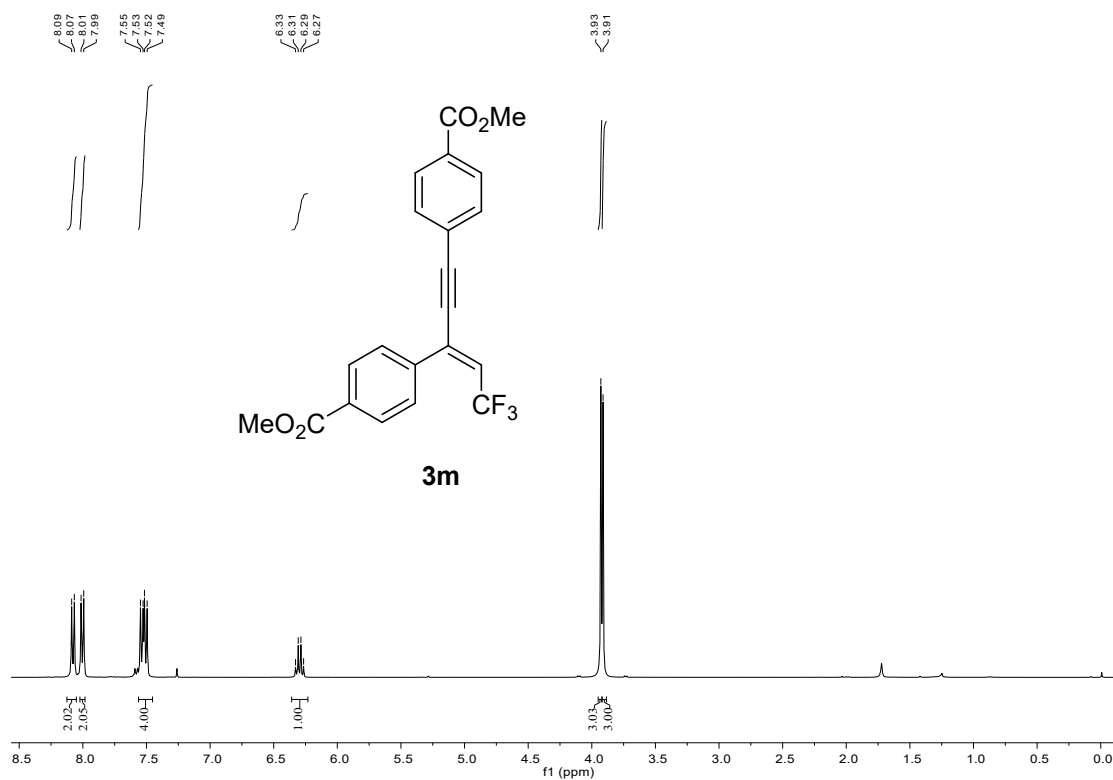

S67

CO<sub>2</sub>Me

### <sup>13</sup>C NMR Spectrum of 3m

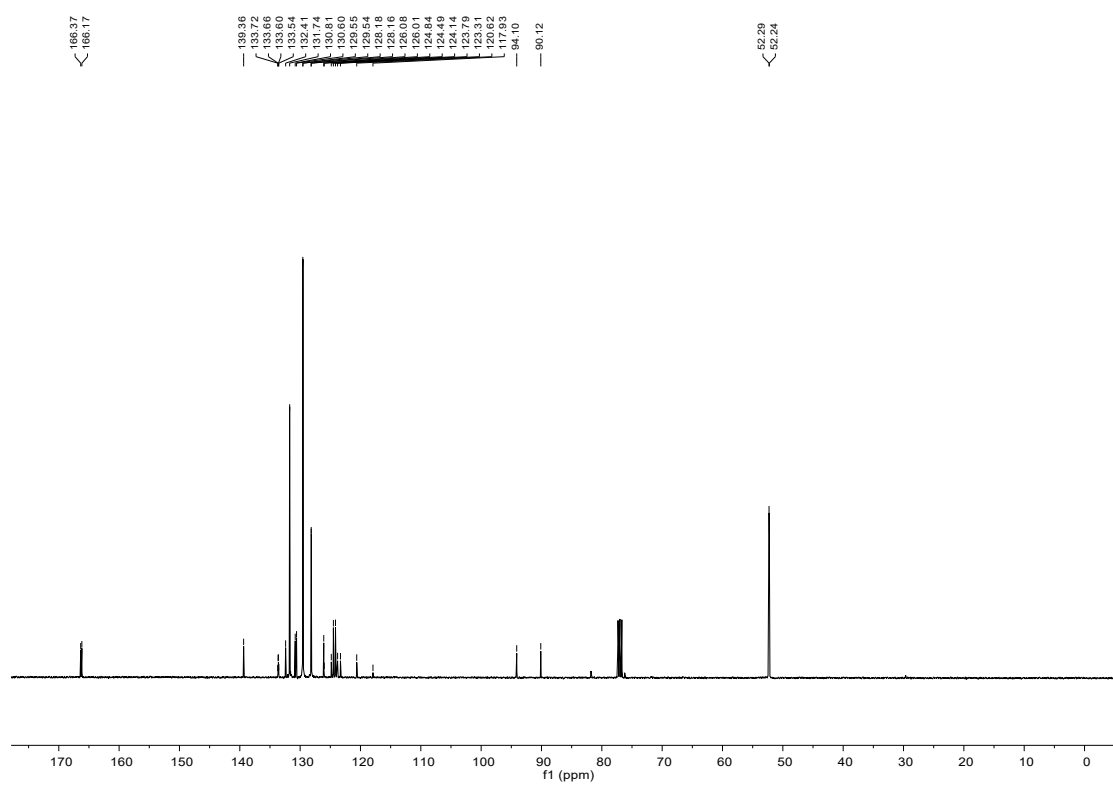

### <sup>19</sup>F NMR Spectrum of 3m

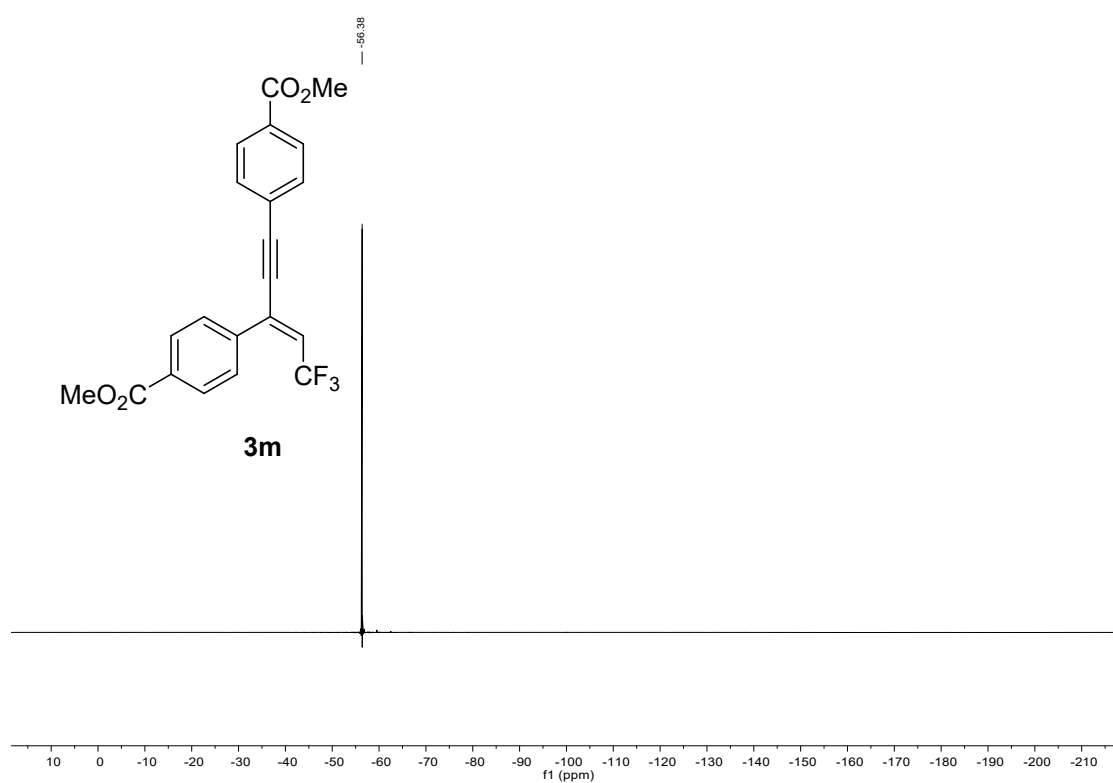

### <sup>1</sup>H NMR Spectrum of 3n

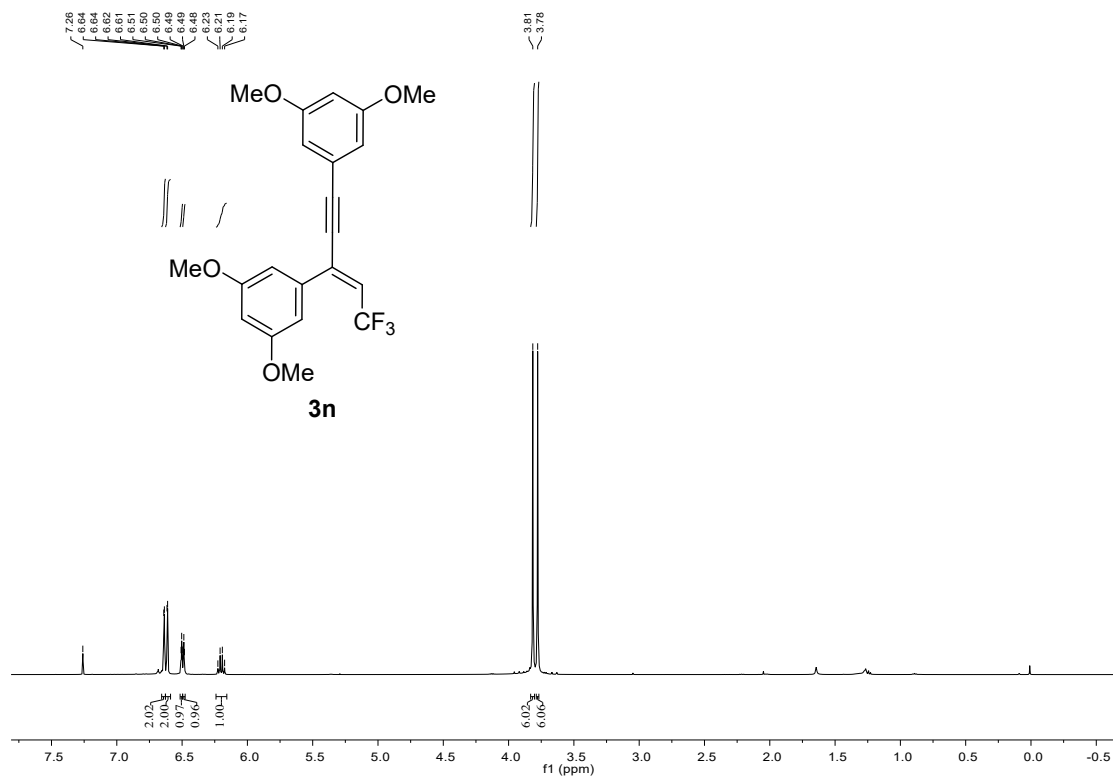

### <sup>13</sup>C NMR Spectrum of 3n

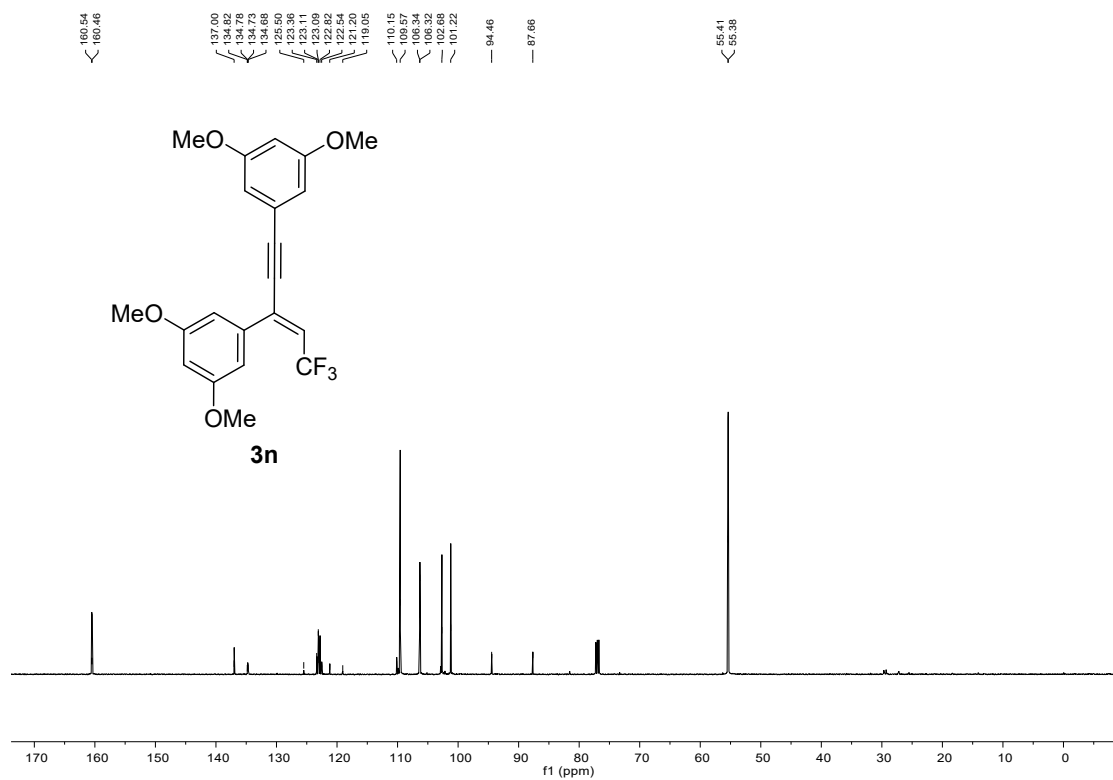

**<sup>19</sup>F NMR Spectrum of 3n**

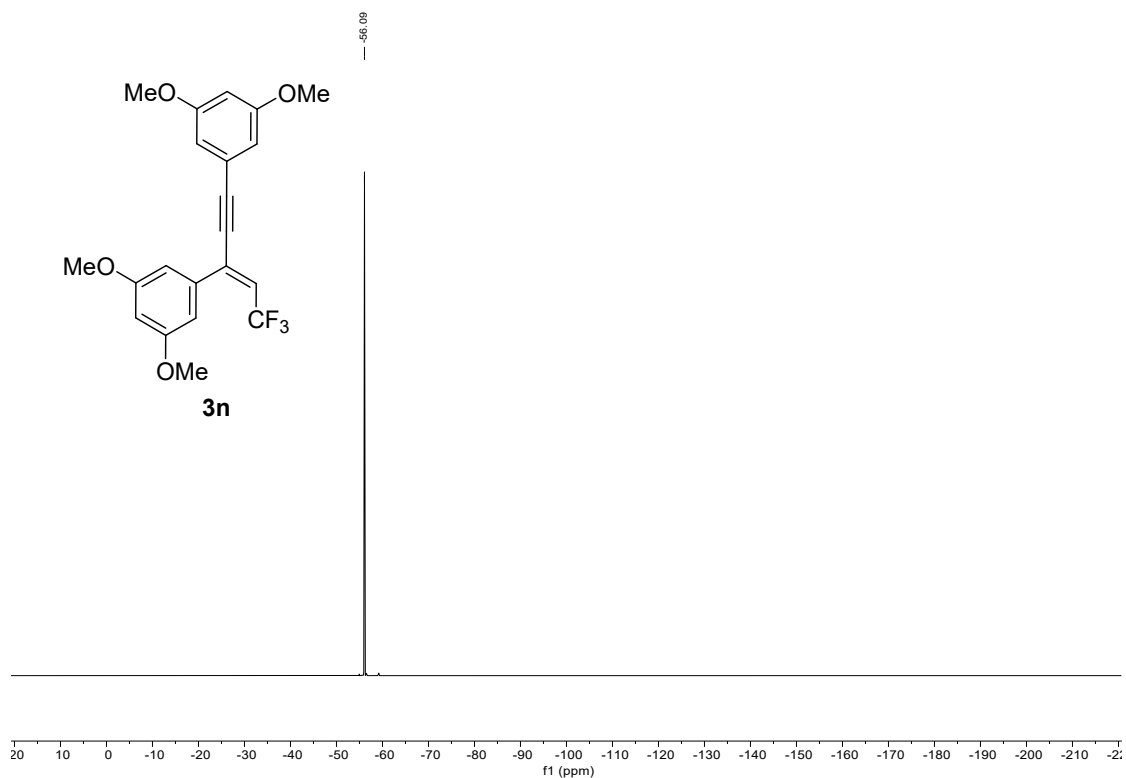

### <sup>1</sup>H NMR Spectrum of 3o

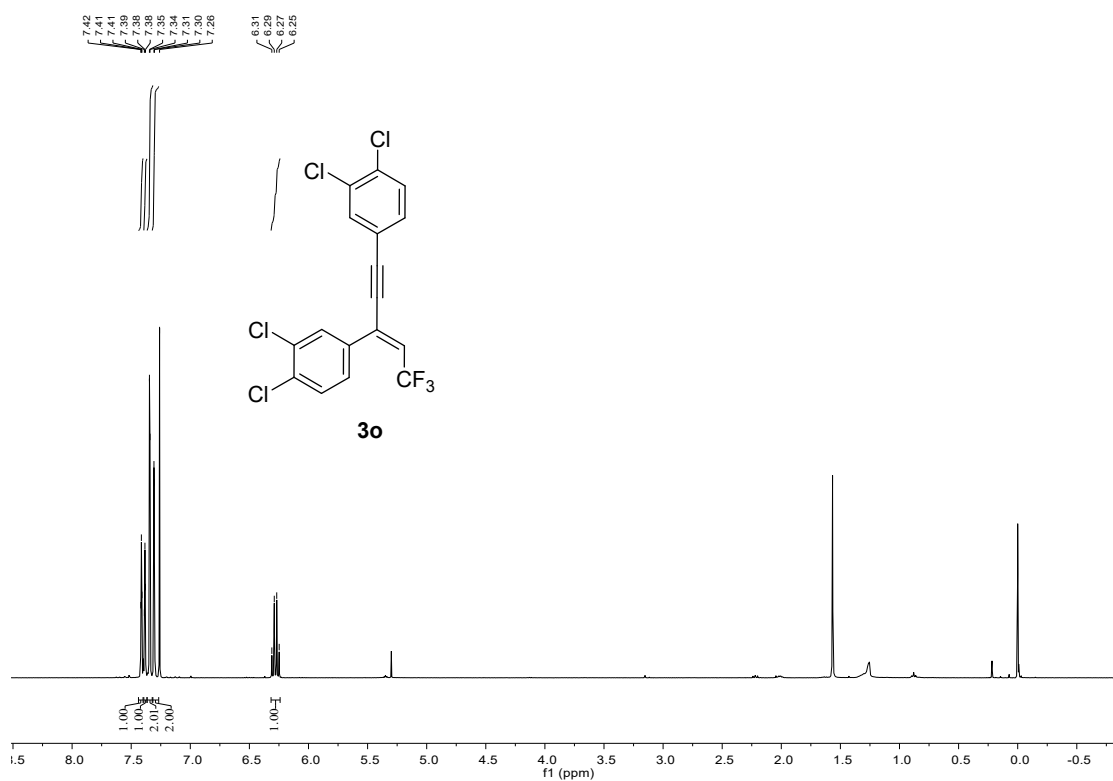

### <sup>13</sup>C NMR Spectrum of 3o

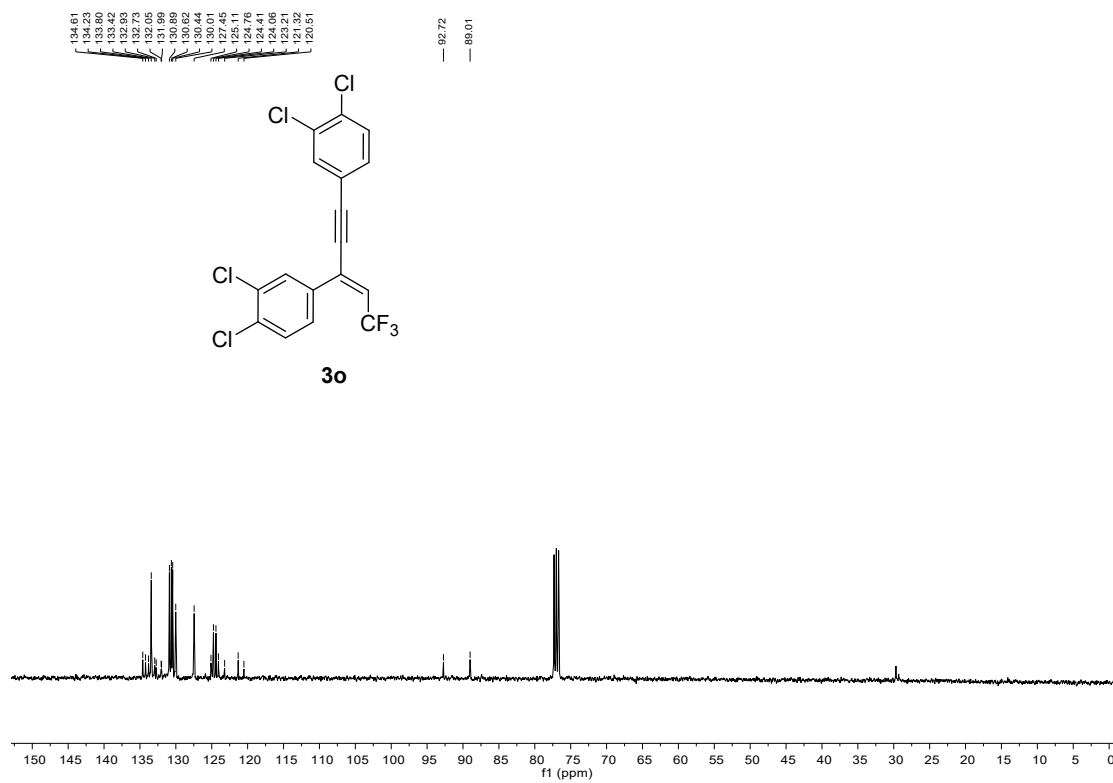

### <sup>19</sup>F NMR Spectrum of 3o

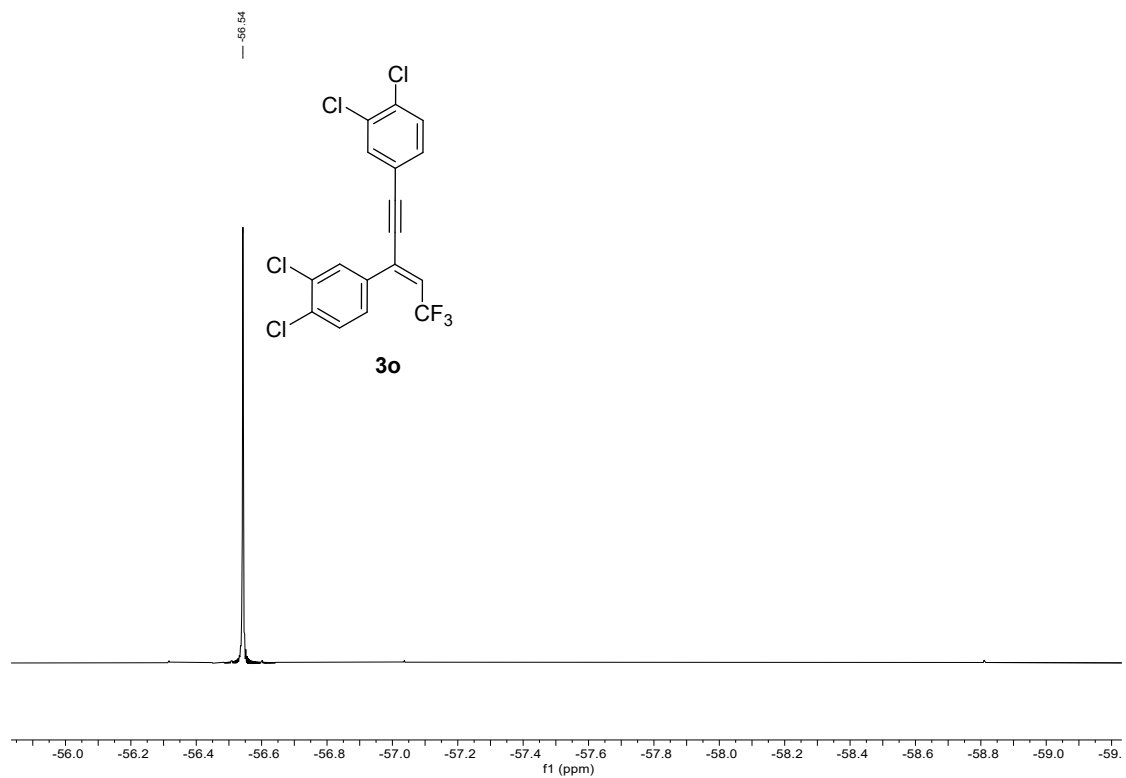

### <sup>1</sup>H NMR Spectrum of 3p

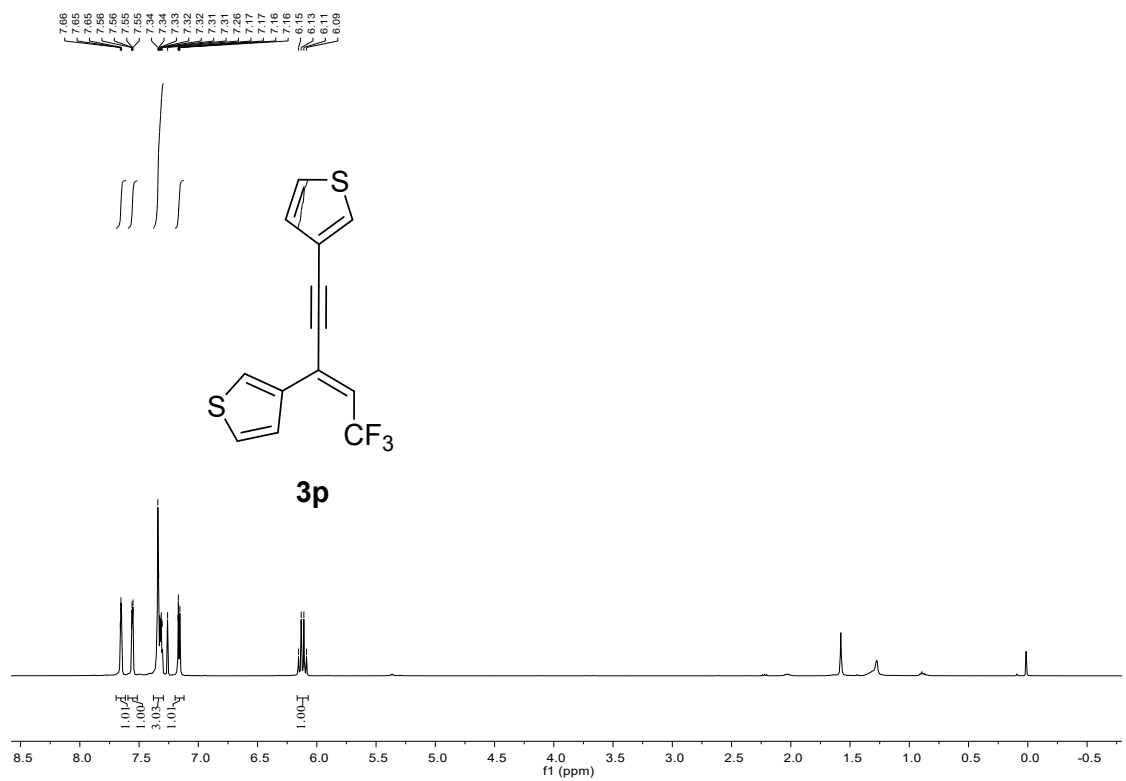



### <sup>13</sup>C NMR Spectrum of 3p

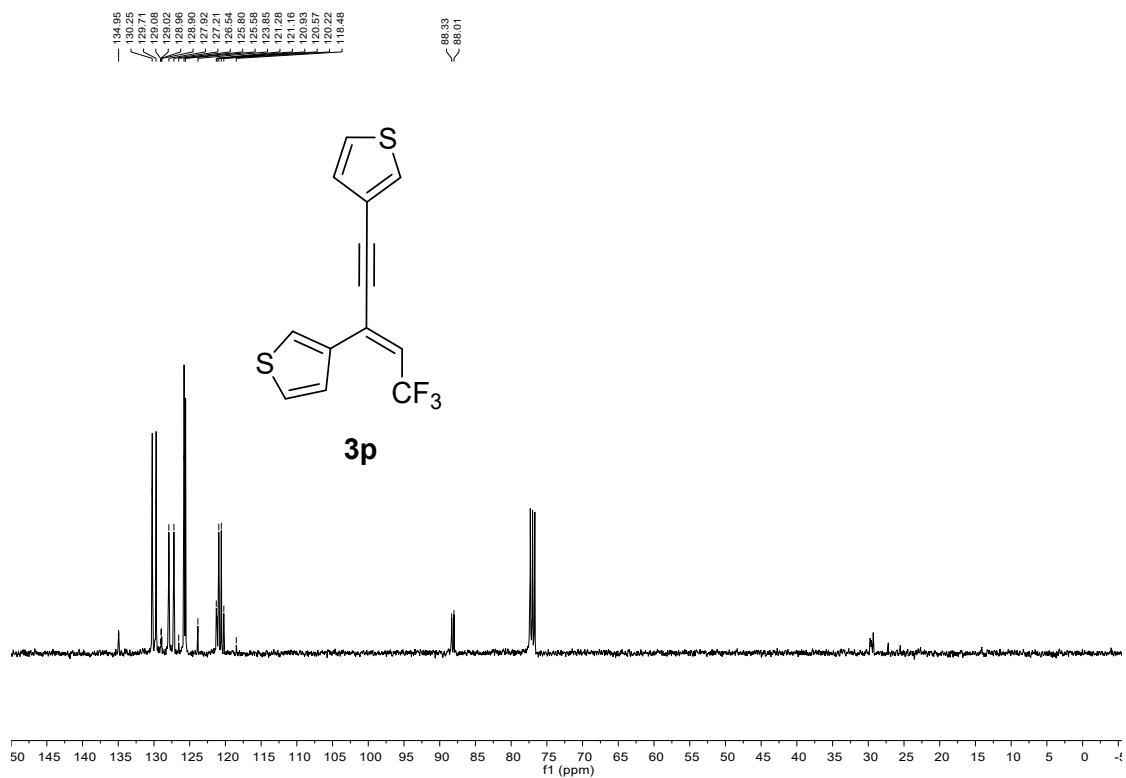

### <sup>19</sup>F NMR Spectrum of 3p

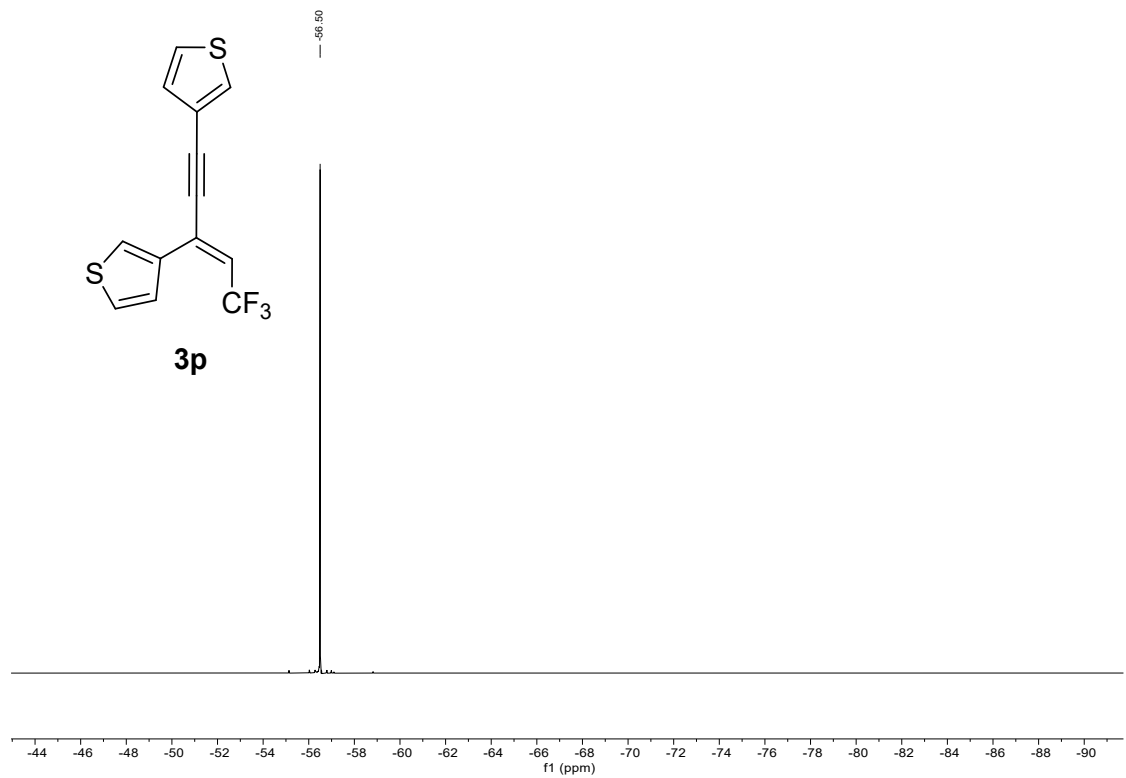

### <sup>1</sup>H NMR Spectrum of 3q

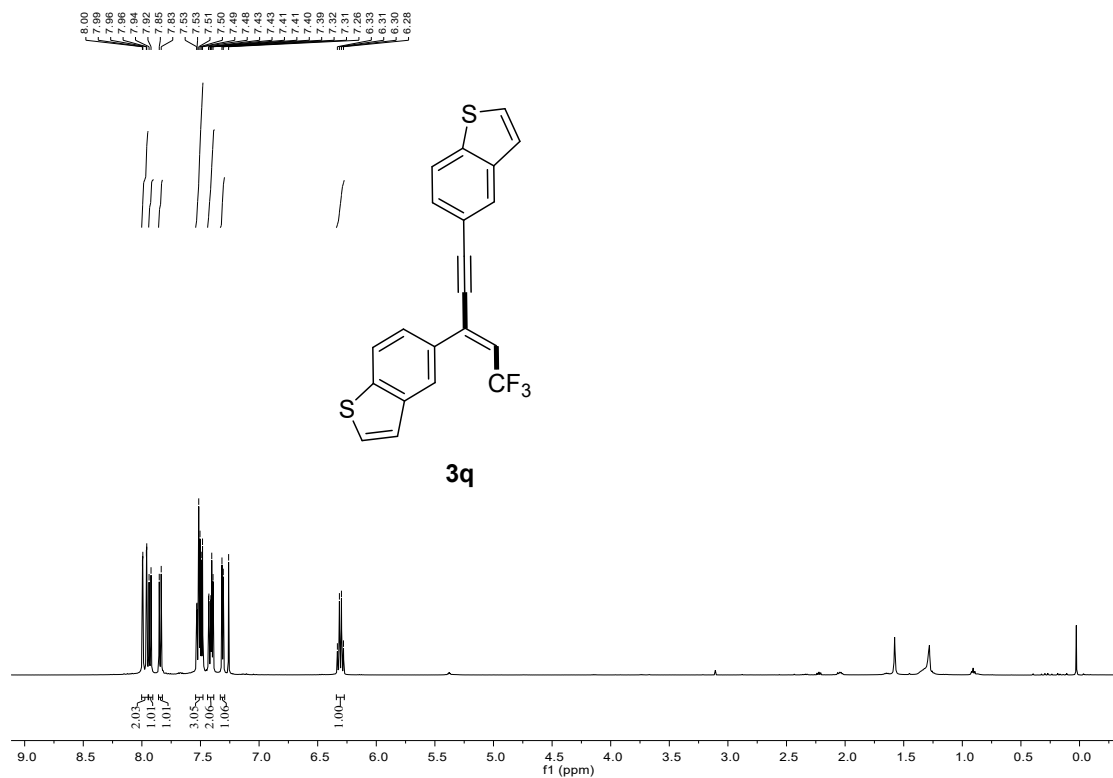

### <sup>13</sup>C NMR Spectrum of 3q

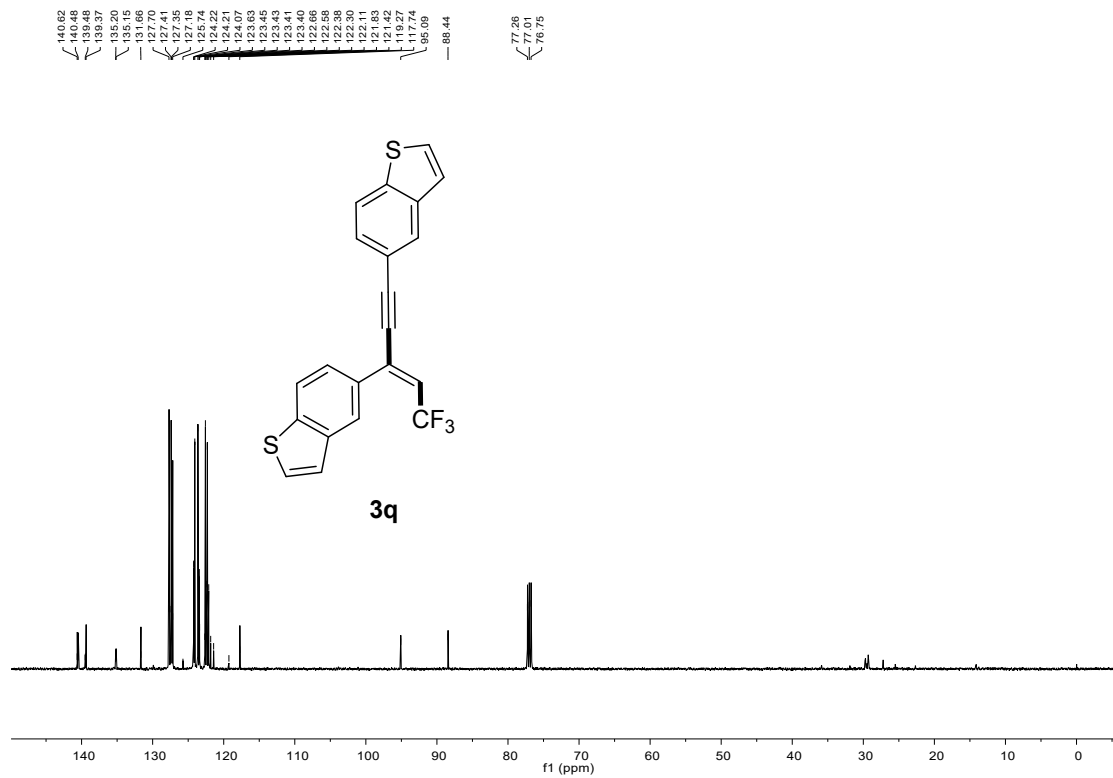

### <sup>19</sup>F NMR Spectrum of 3q

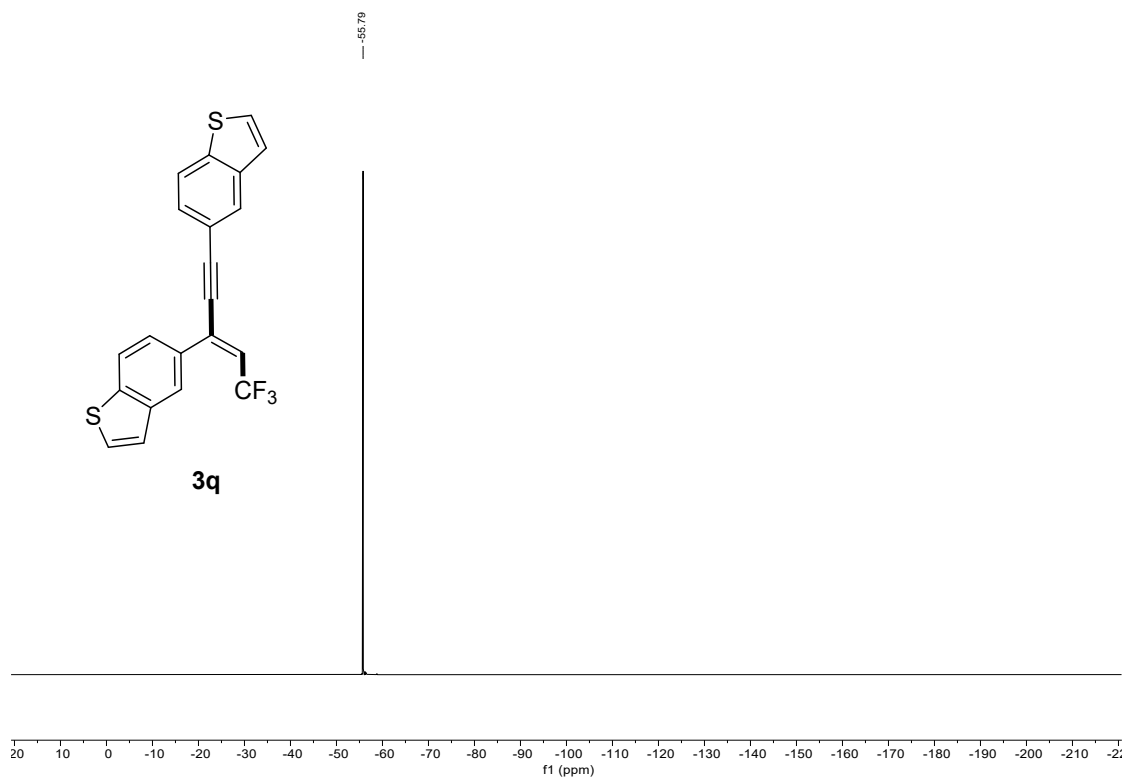

### <sup>1</sup>H NMR Spectrum of 3r

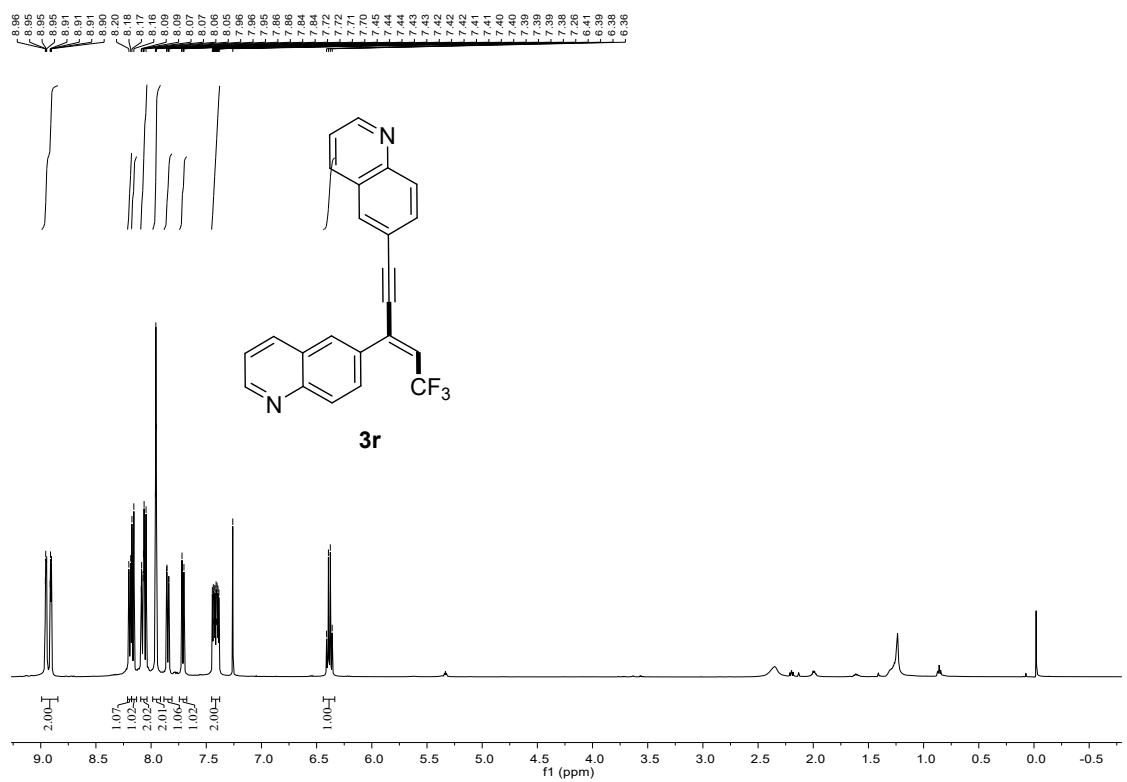

### <sup>13</sup>C NMR Spectrum of 3r

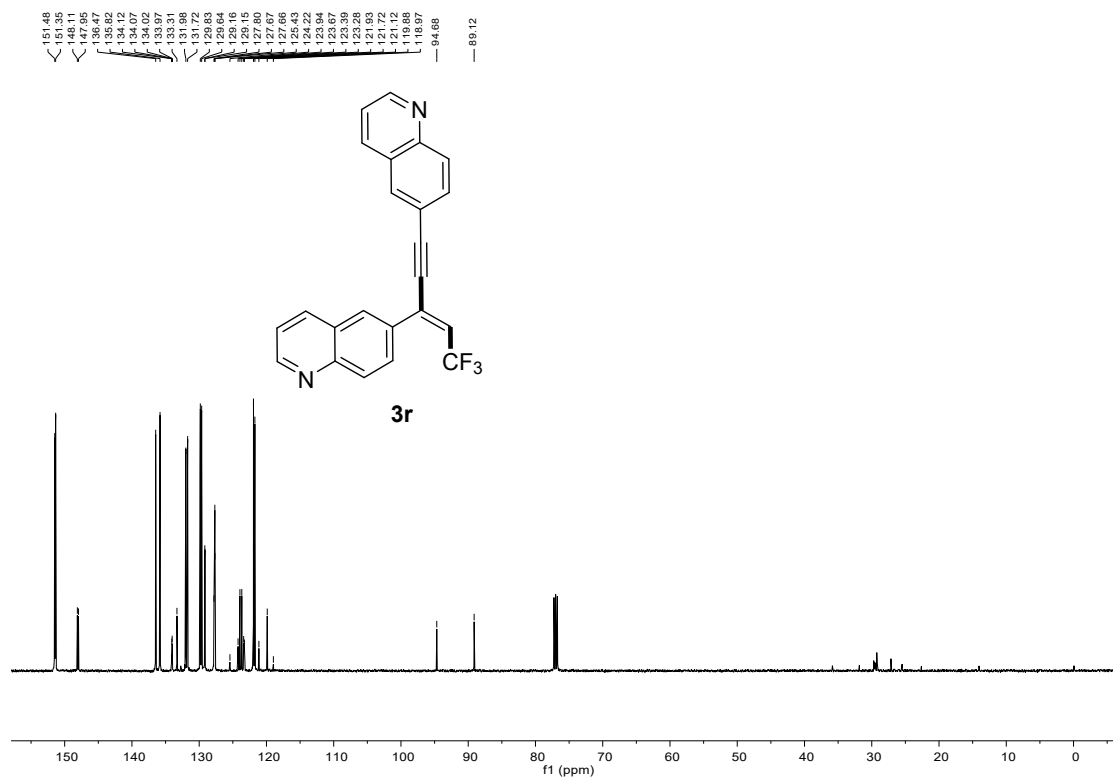

### <sup>19</sup>F NMR Spectrum of 3r

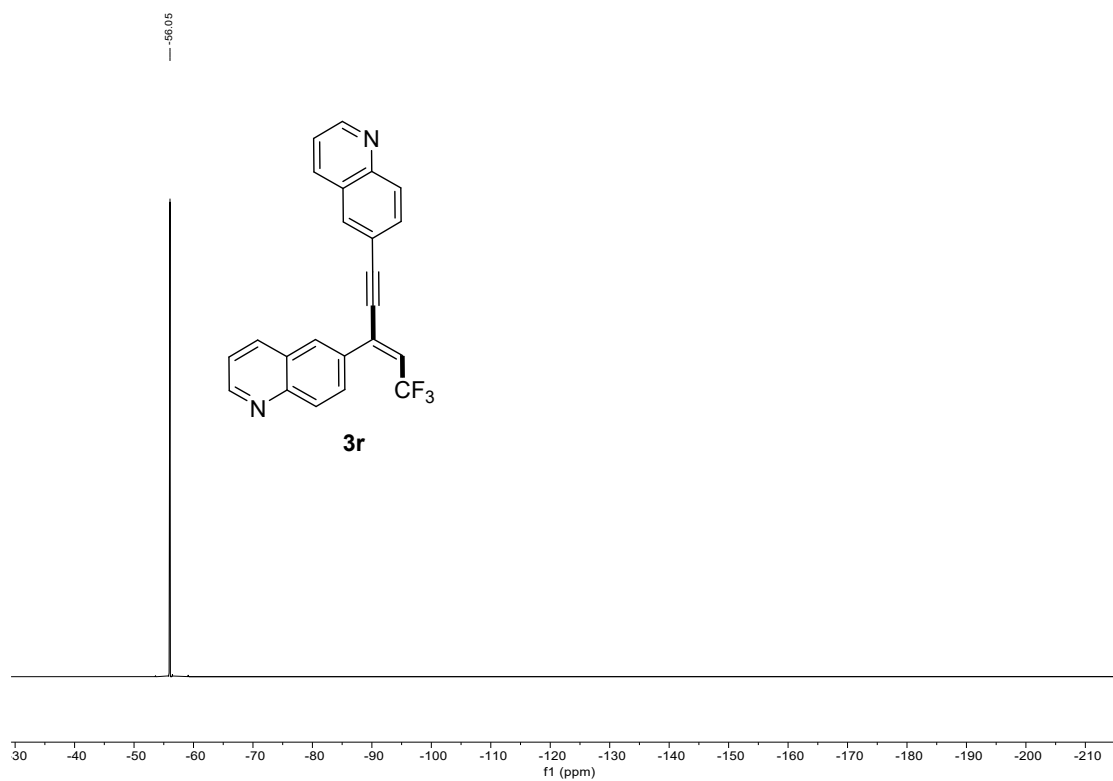

### <sup>1</sup>H NMR Spectrum of 3s

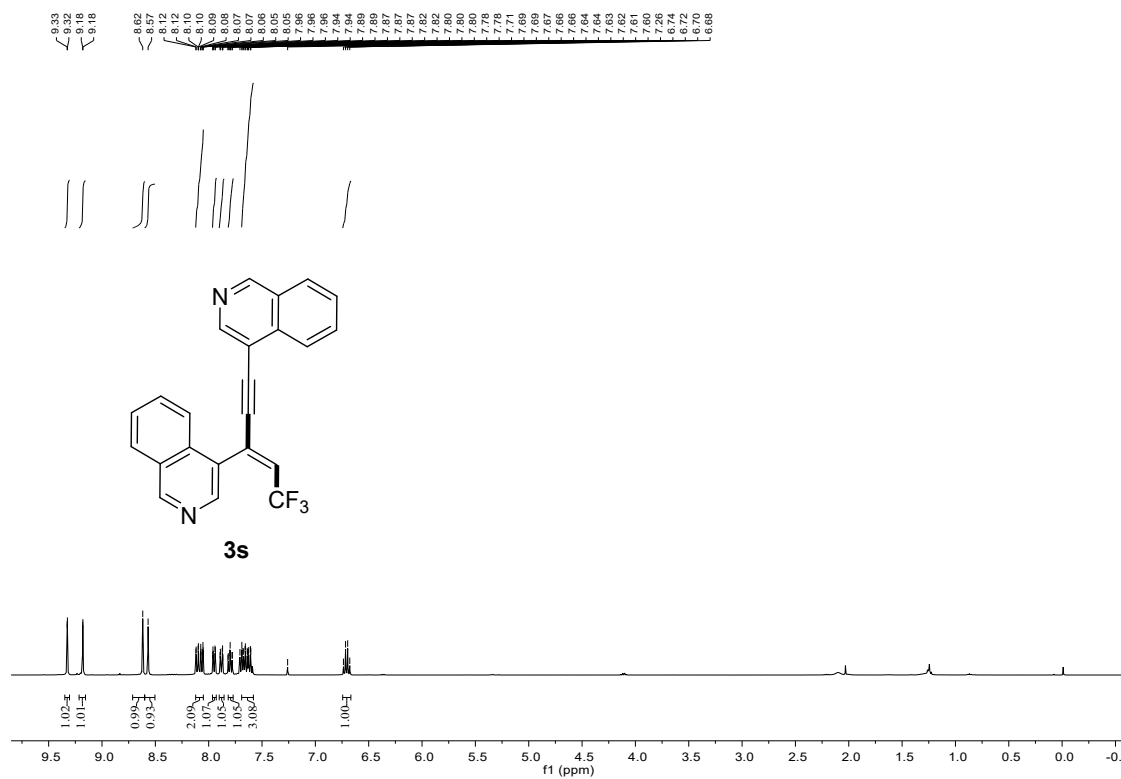

### <sup>13</sup>C NMR Spectrum of 3s

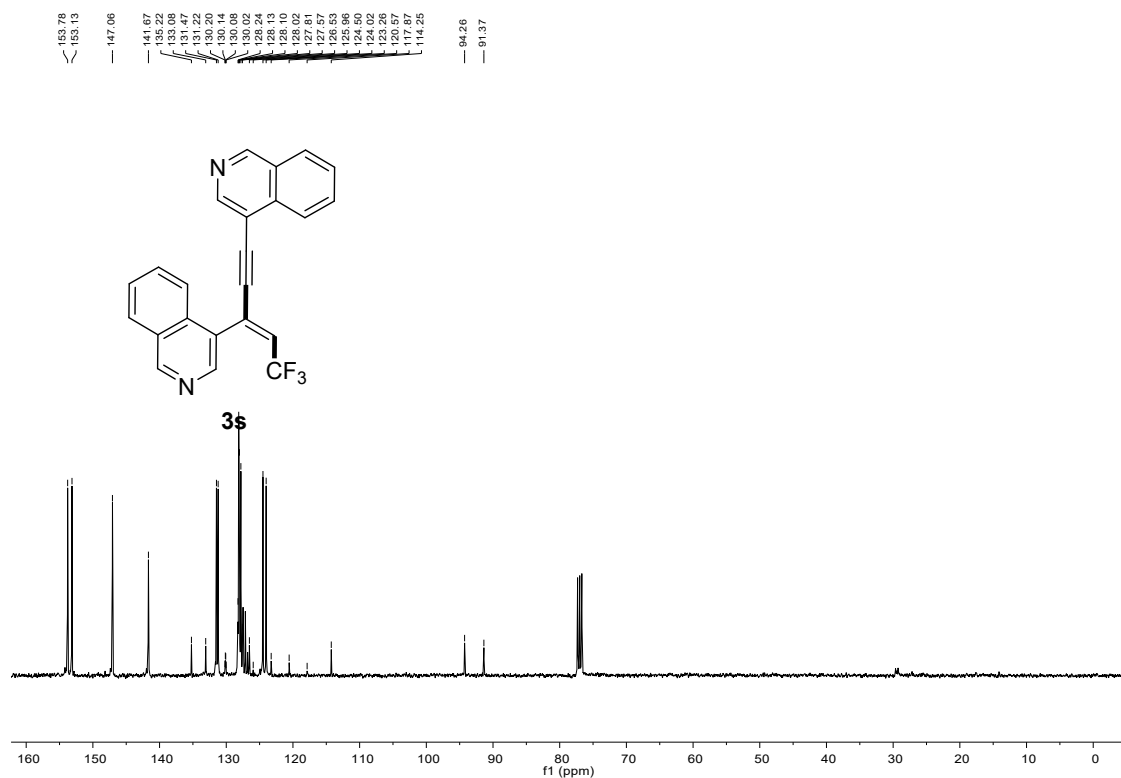

**<sup>19</sup>F NMR Spectrum of 3s**

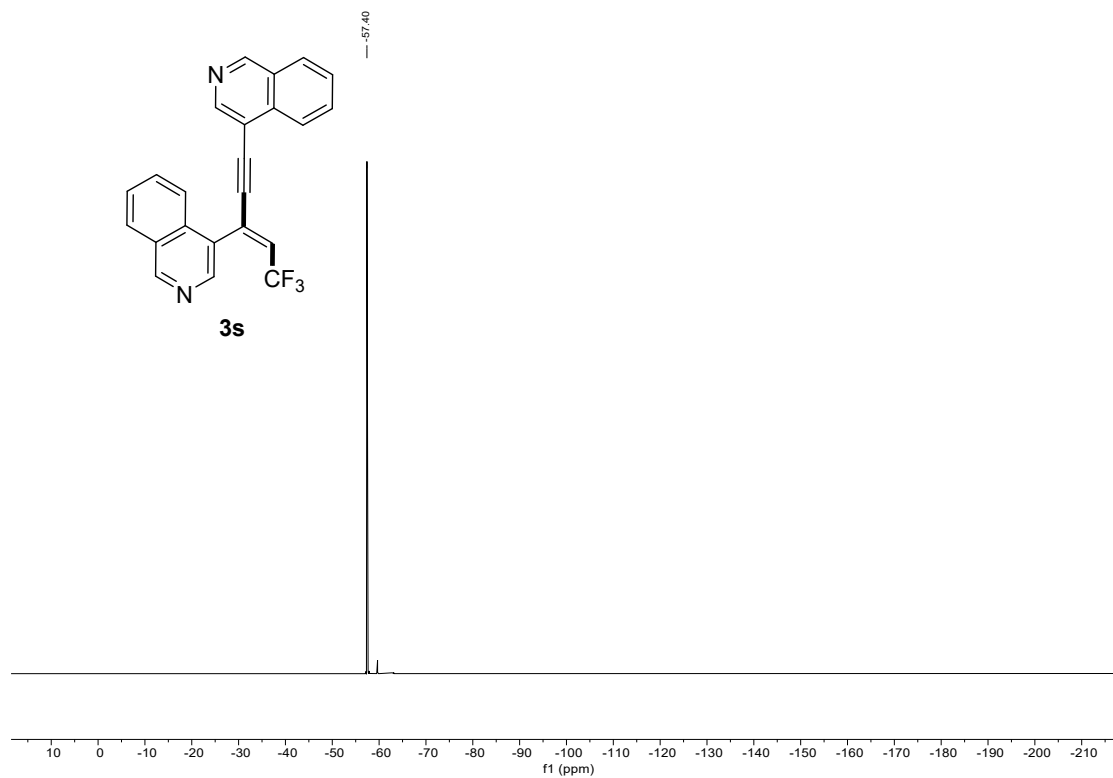

**<sup>1</sup>H NMR Spectrum of 3t**

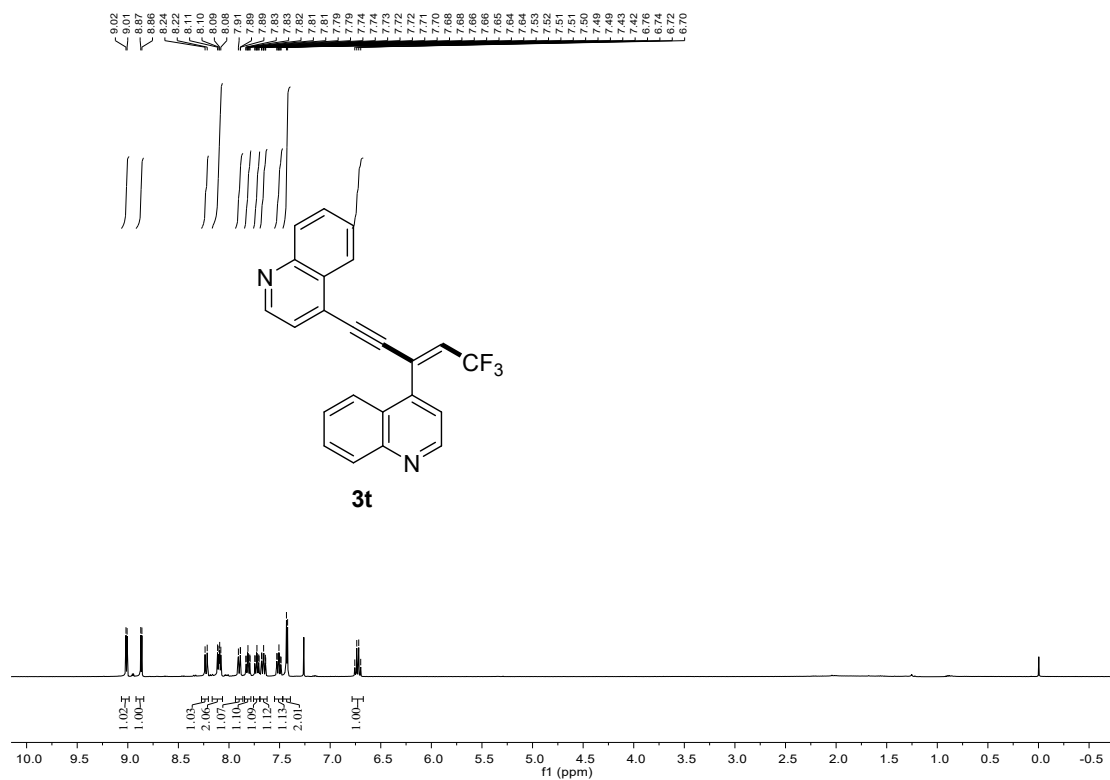

**<sup>13</sup>C NMR Spectrum of 3t**

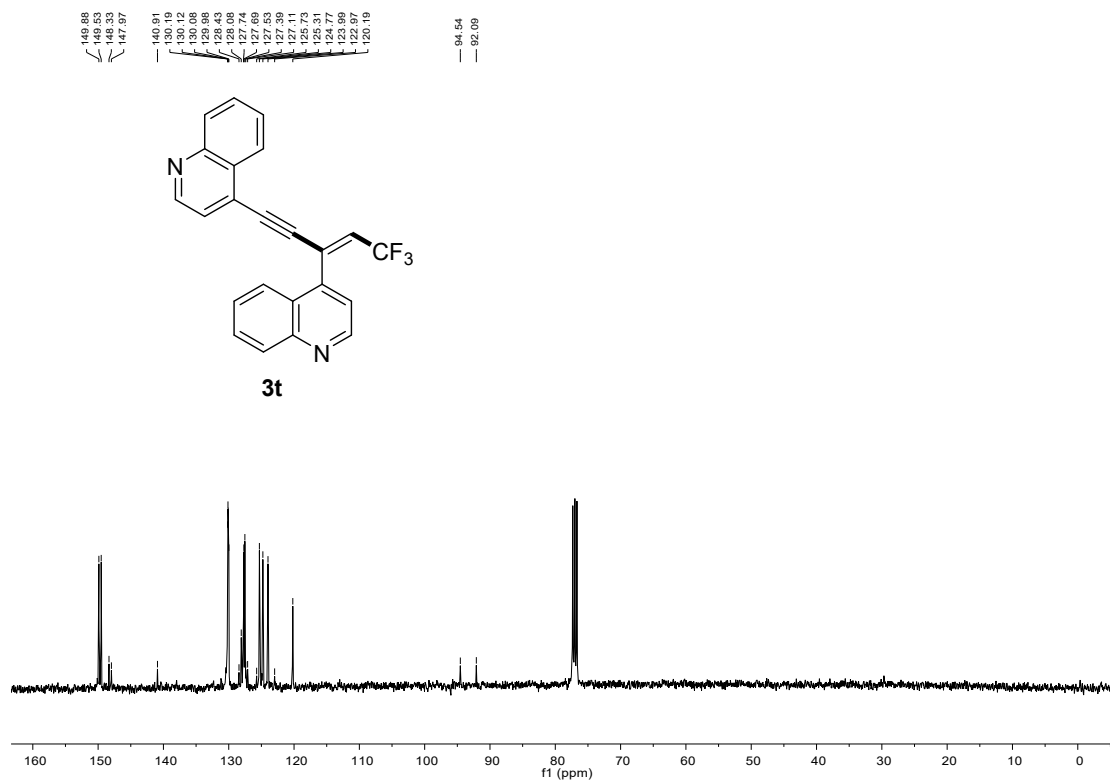

**<sup>19</sup>F NMR Spectrum of 3t**

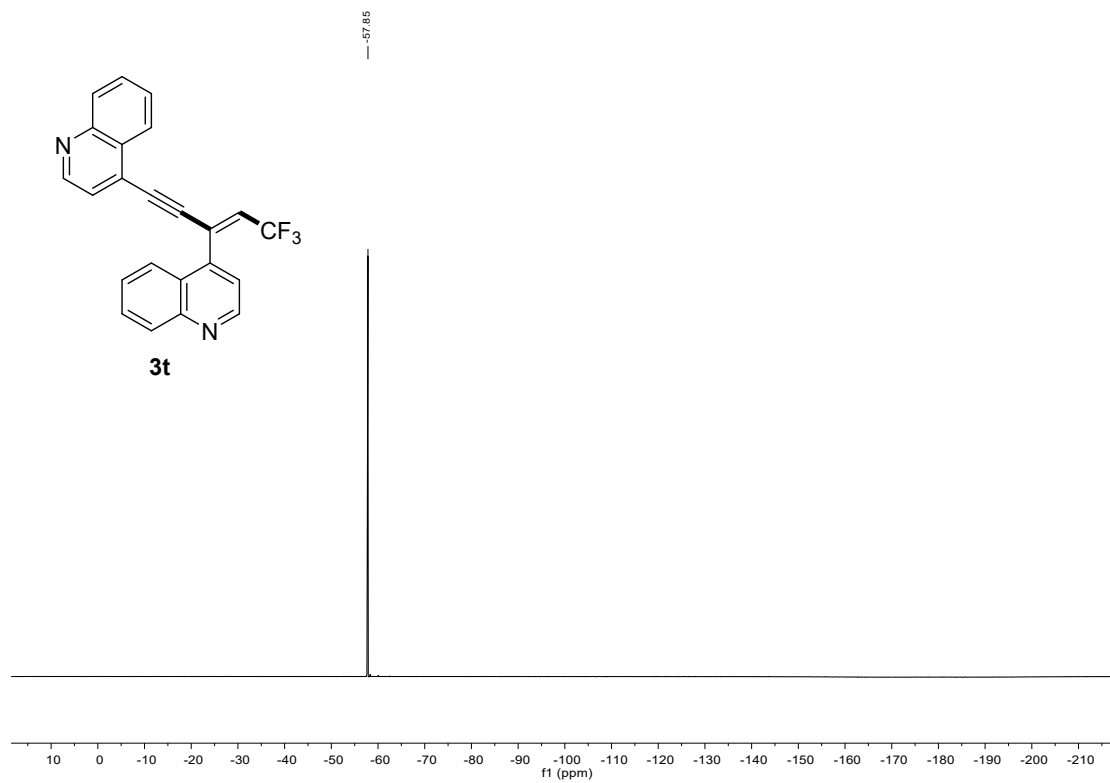

### <sup>1</sup>H NMR Spectrum of 3u

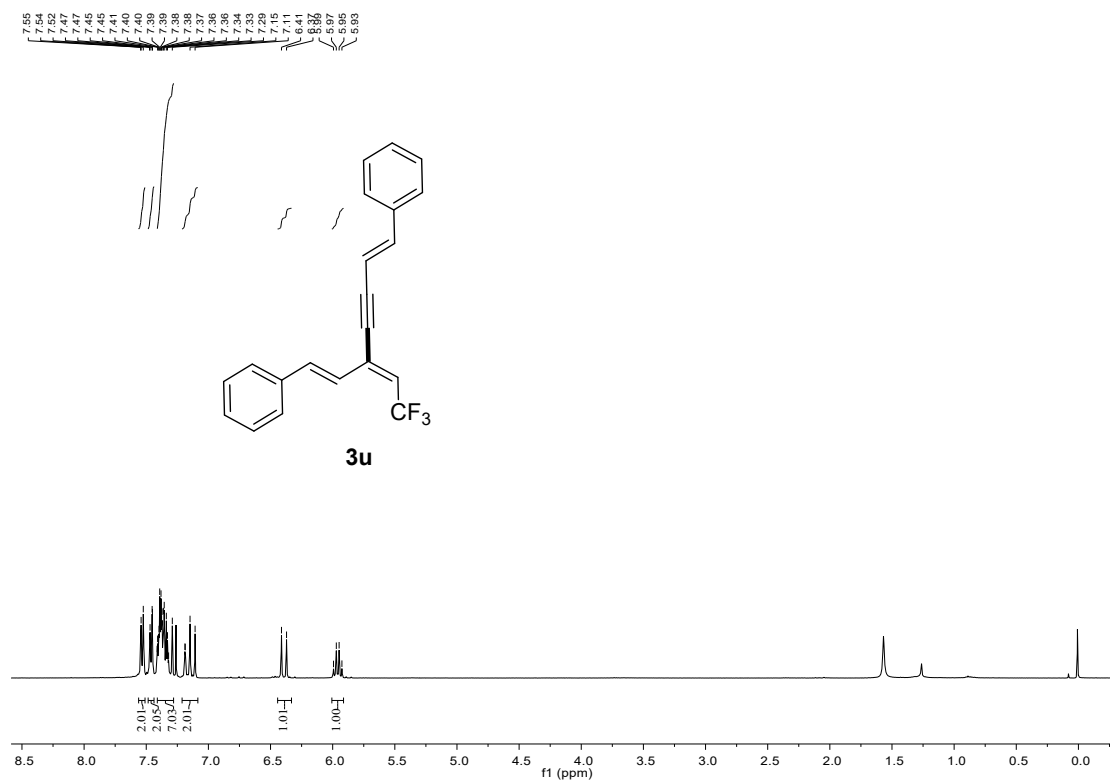

### <sup>13</sup>C NMR Spectrum of 3u



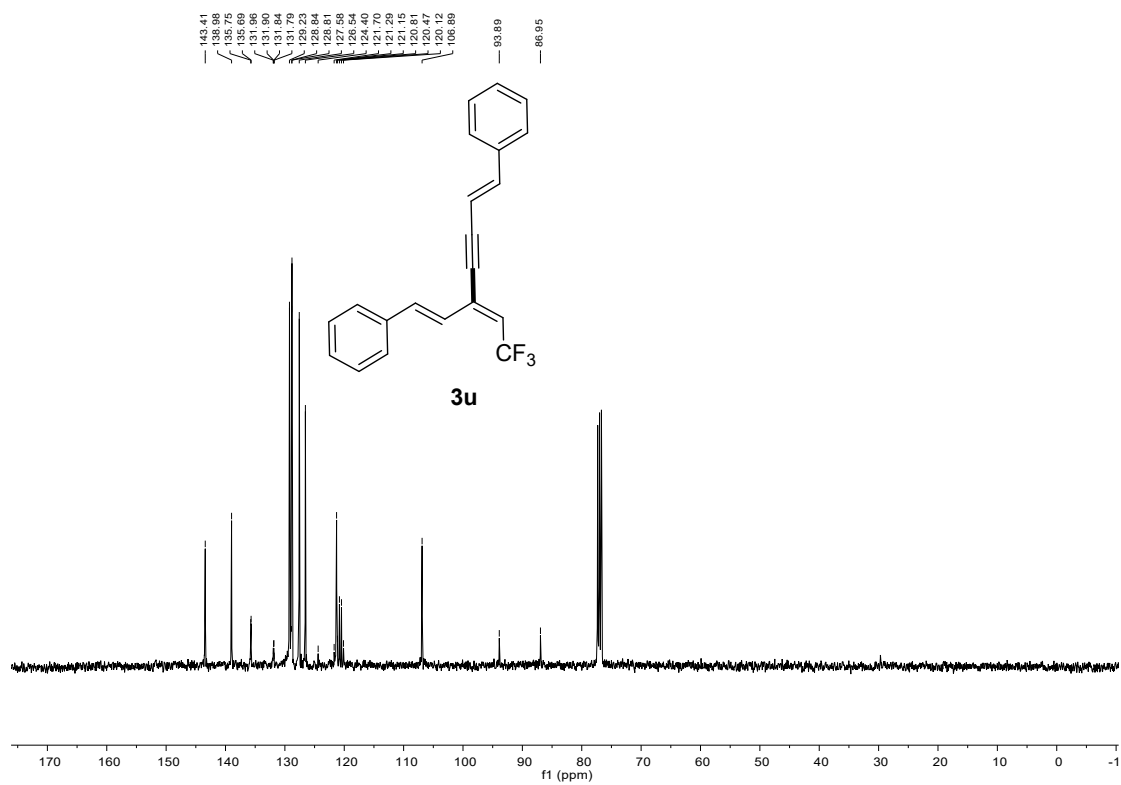

**<sup>19</sup>F NMR Spectrum of 3u**

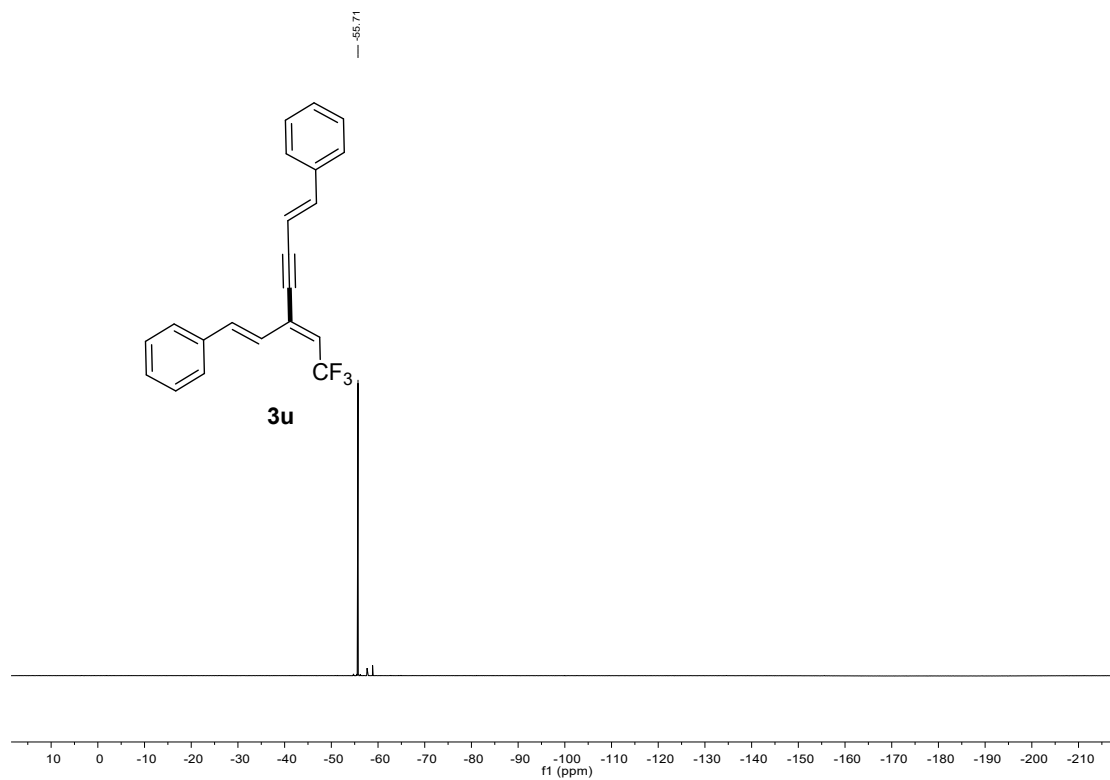

**<sup>1</sup>H NMR Spectrum of 3v**

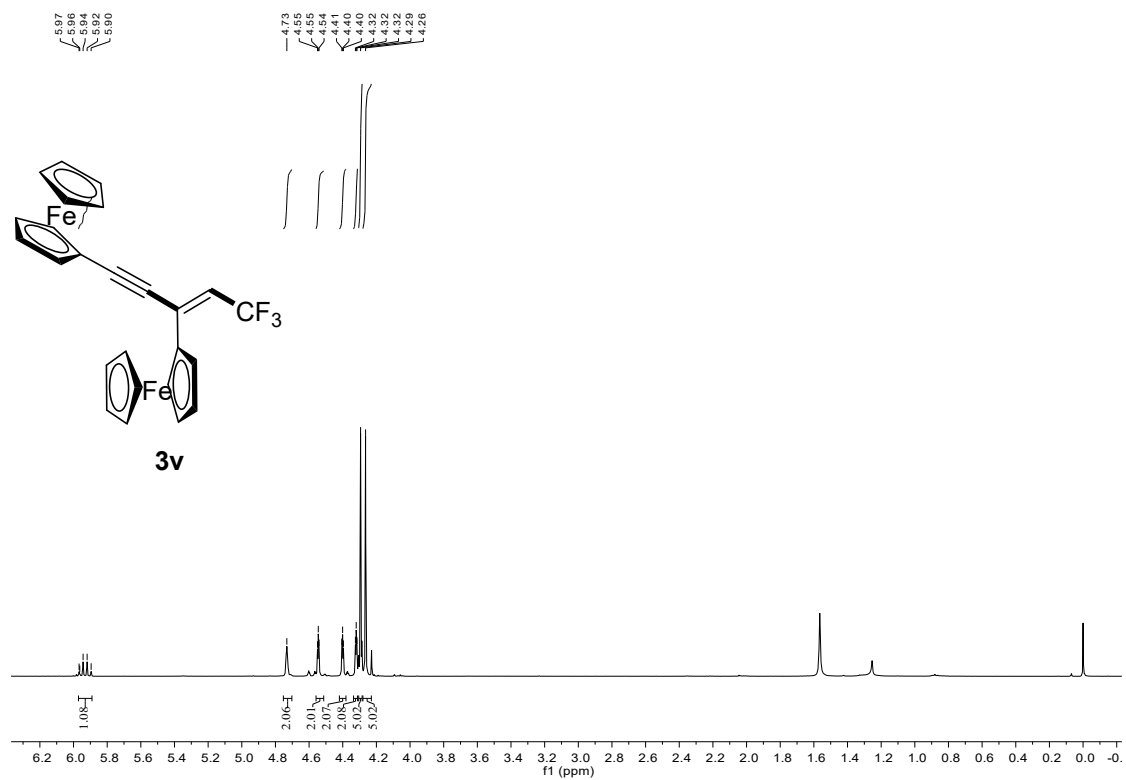

**<sup>13</sup>C NMR Spectrum of 3v**

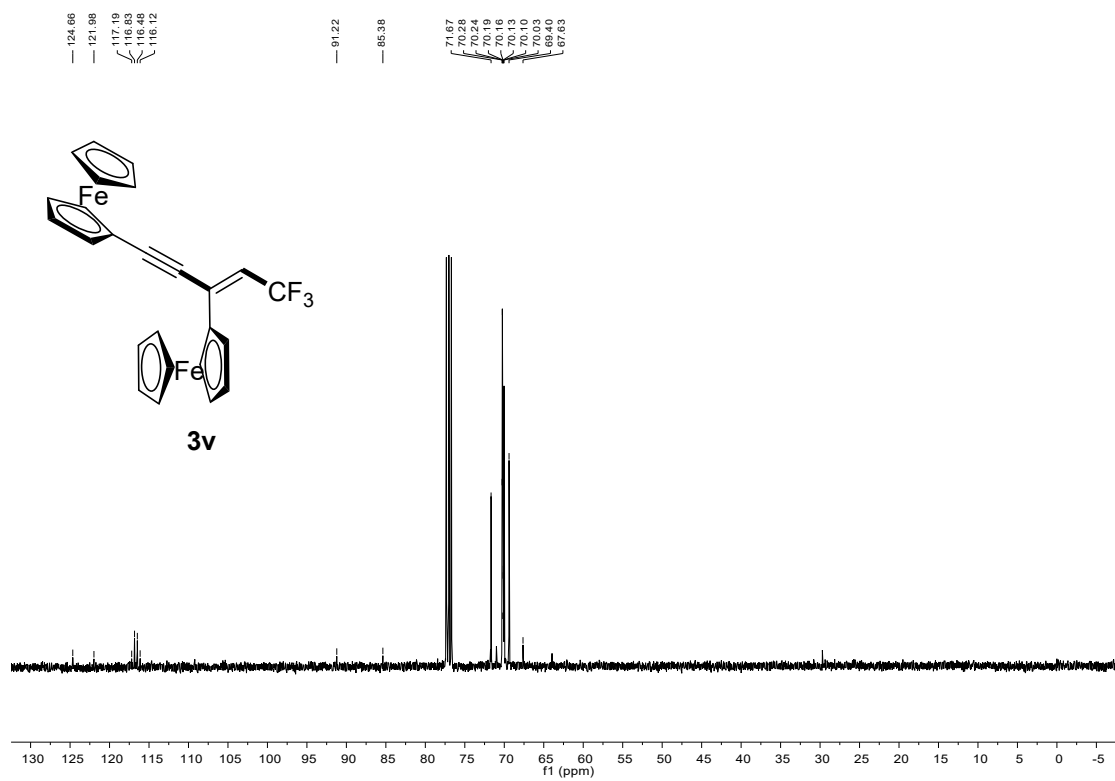

### <sup>19</sup>F NMR Spectrum of 3v

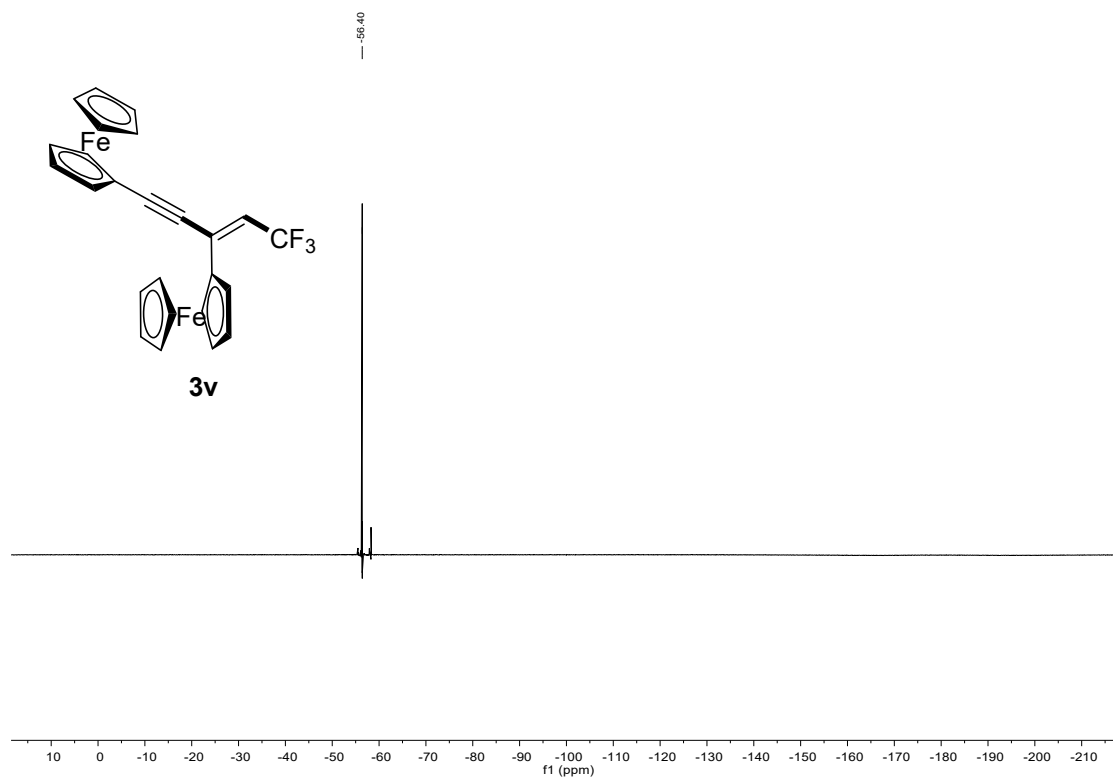

### <sup>1</sup>H NMR Spectrum of 3dj

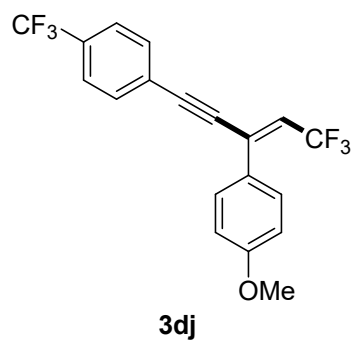

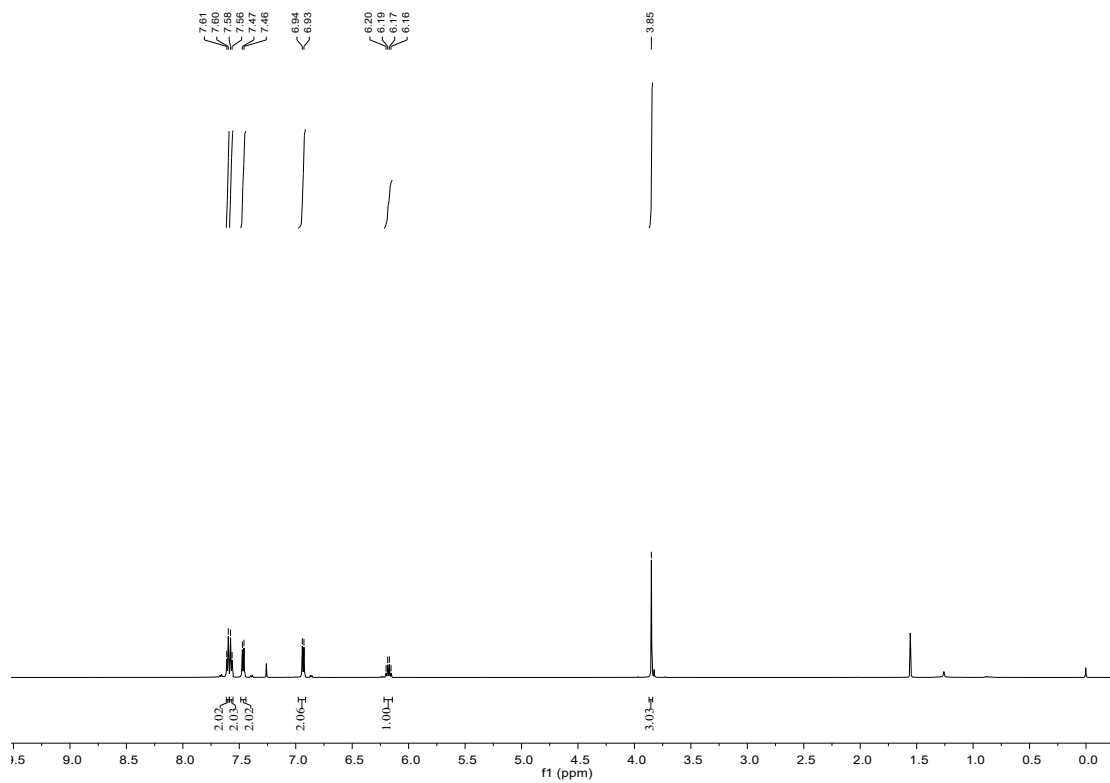

**<sup>13</sup>C NMR Spectrum of 3dj**

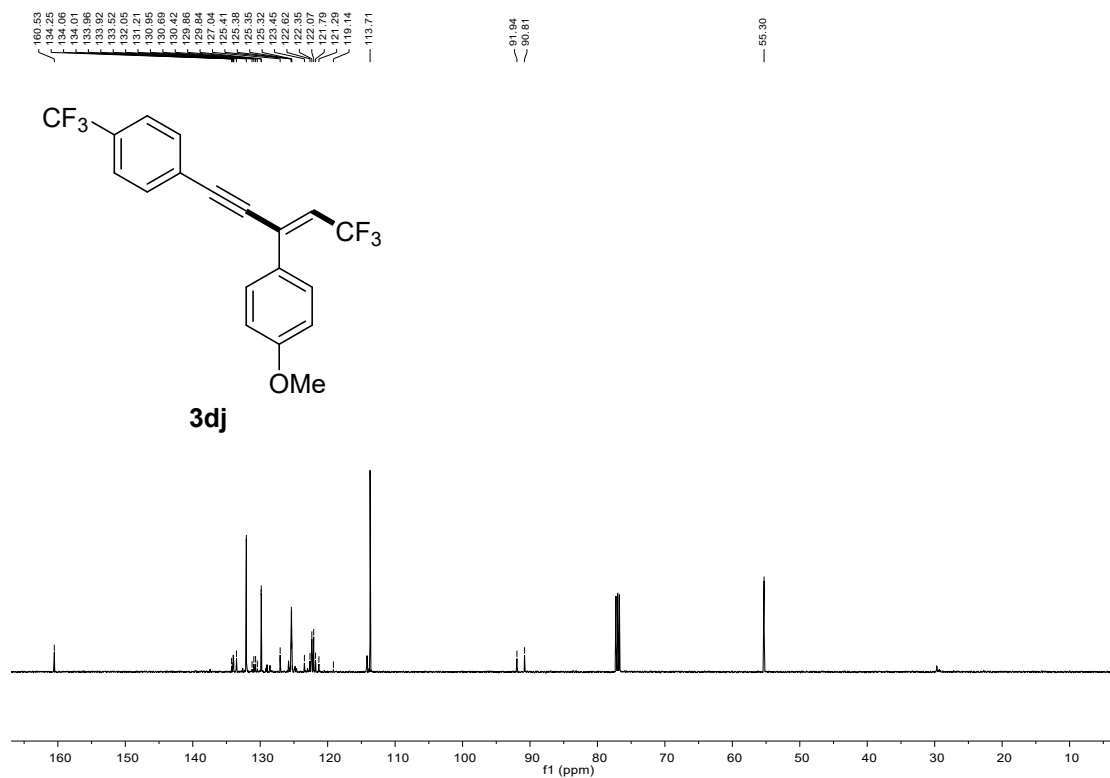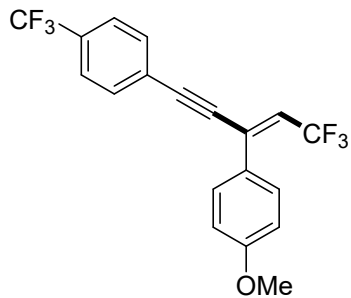

# <sup>19</sup>F NMR Spectrum of 3dj

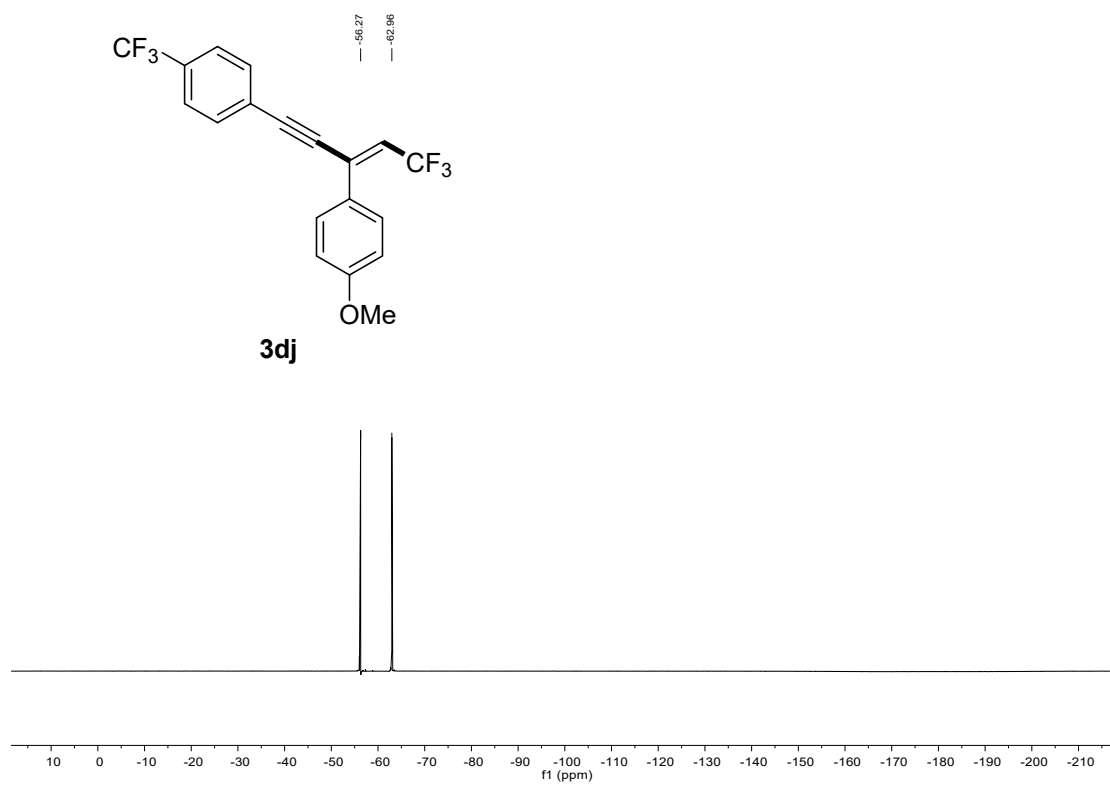

Supplement: d1qo01201k1.pdf [file d1qo01201k1.pdf]
